# Supplementary material for: Deletion of ARGLU1 causes global defects in alternative splicing in vivo and mouse cortical malformations primarily via apoptosis
Source: PubMed Central journal article supplement (PMC10447433; doi:10.1038/s41419-023-06071-w), 2023-08-23

Uncropped original western blots in Figure 4E

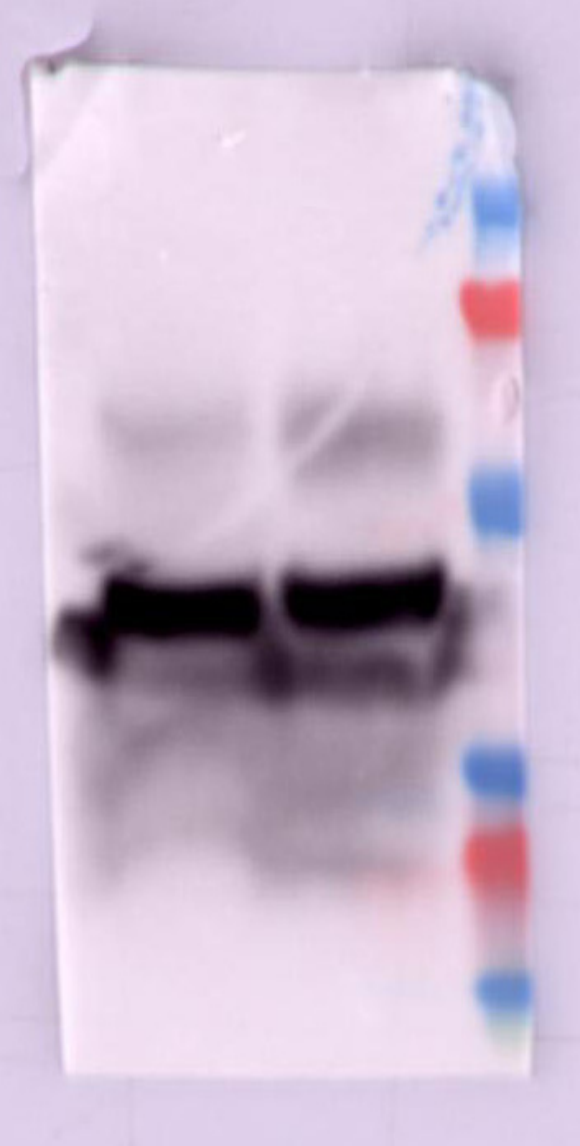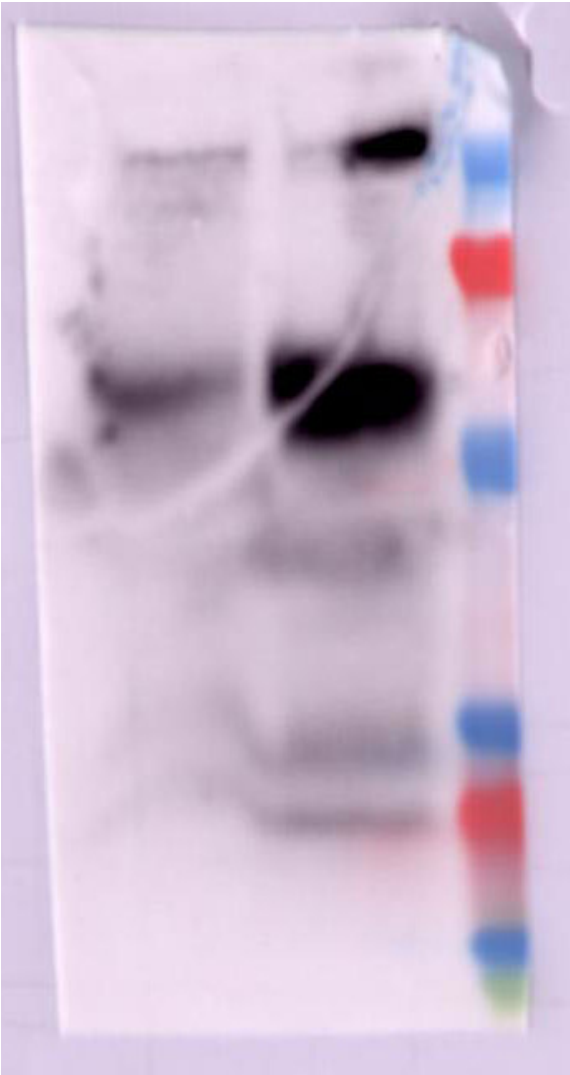

Uncropped original western blots in Figure 4G

**PUMA**

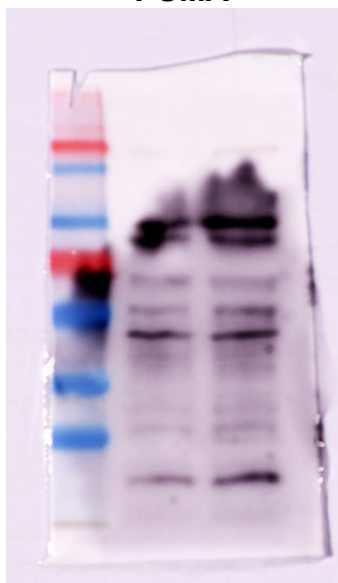

**Actin corresponding to PUMA**

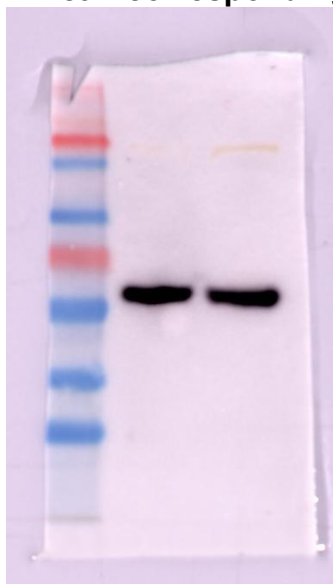

**NOX1**

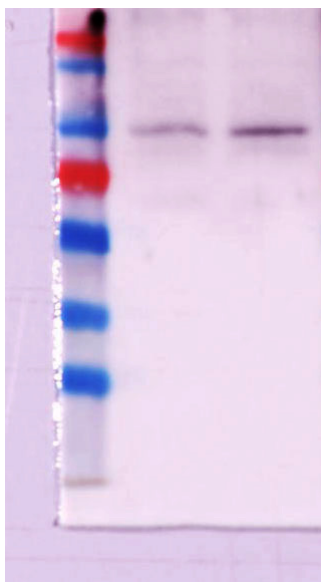

**Actin corresponding to NOX1**

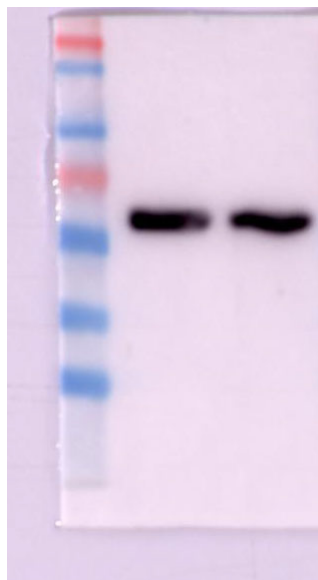

**P21**

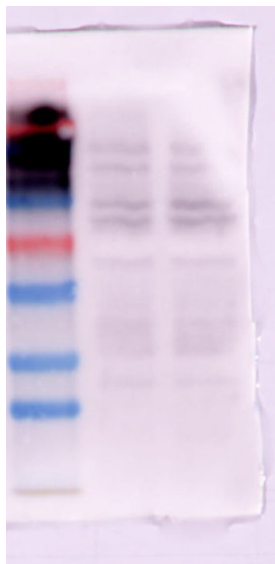

**Actin corresponding to P21**

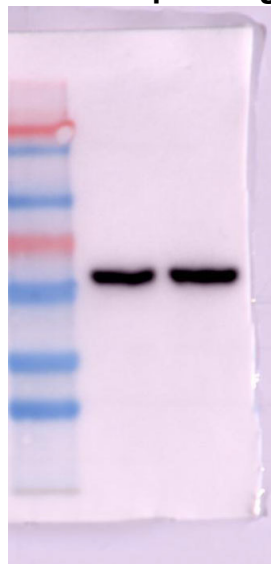

Uncropped original western blots in Figure 5G

Actin corresponding to Mdm2

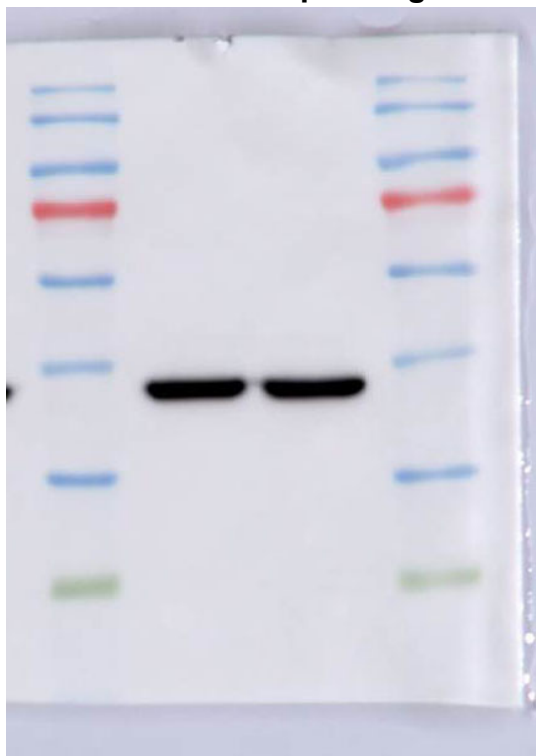

Mdm2

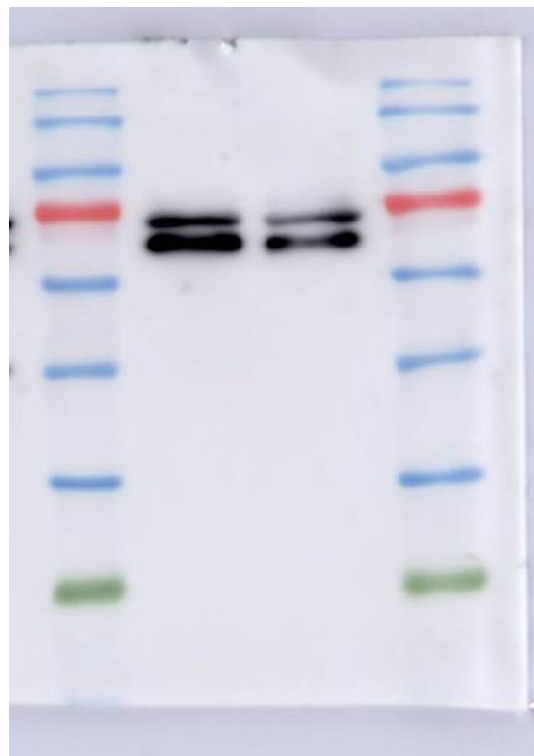

Actin corresponding to Mdm4

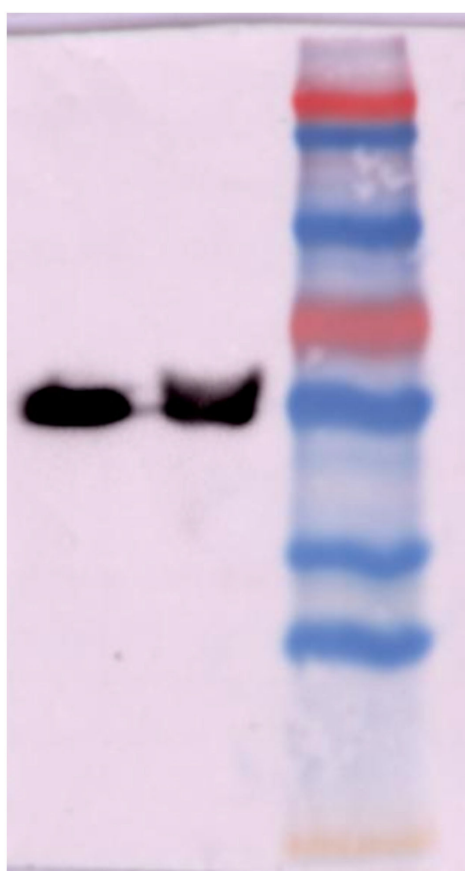

Mdm4

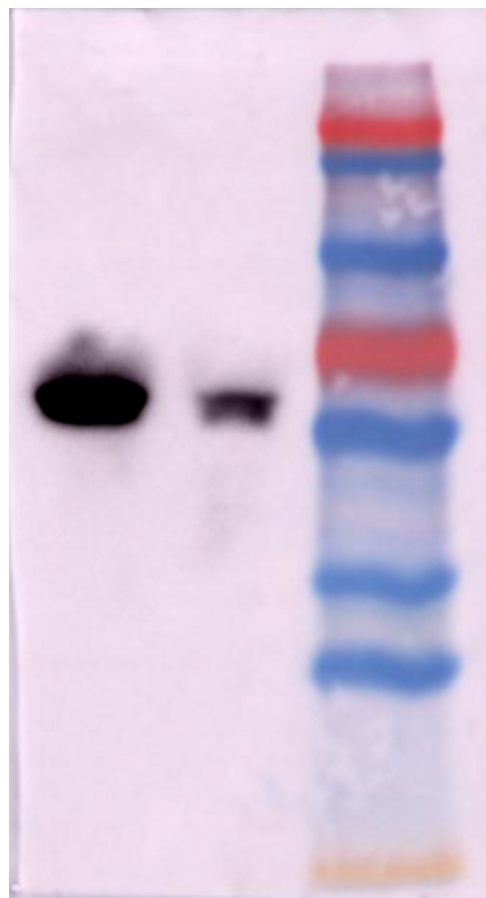

**Uncropped original western blots in Supplementary Figure 6B**

**p53**

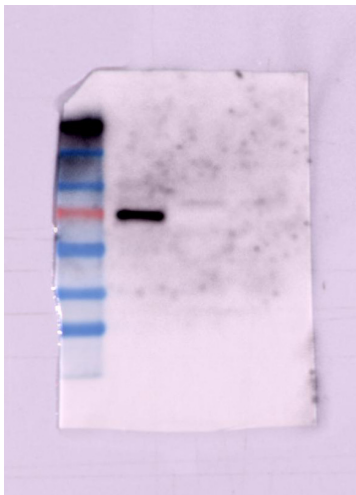

**Actin corresponding to p53**

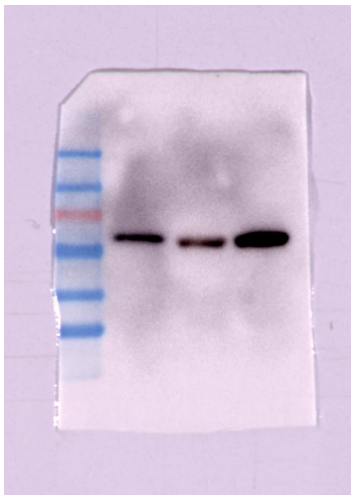

Uncropped original western blots in Supplementary Figure 9E

p53

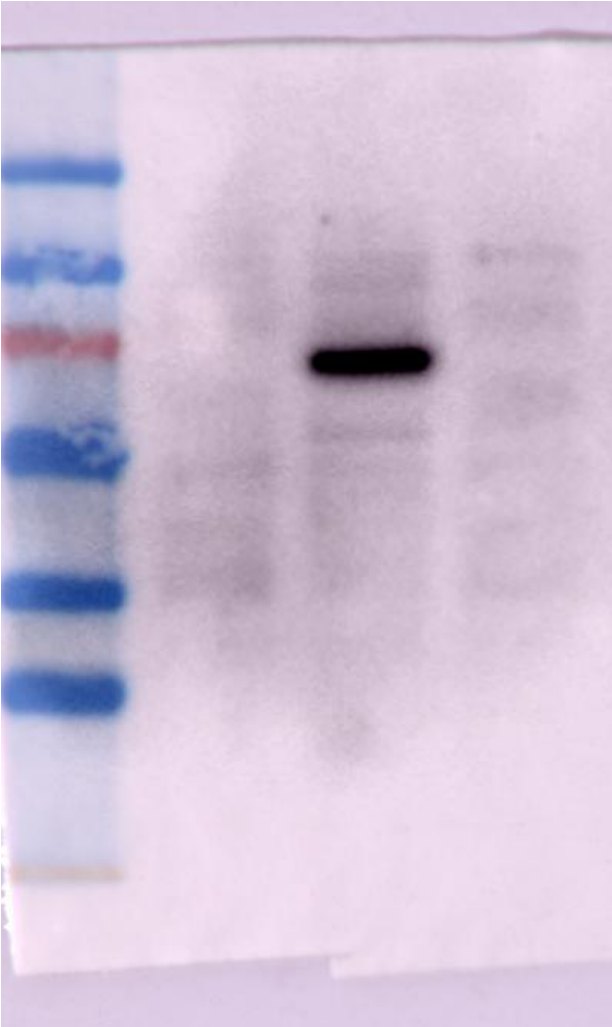

Actin corresponding to p53

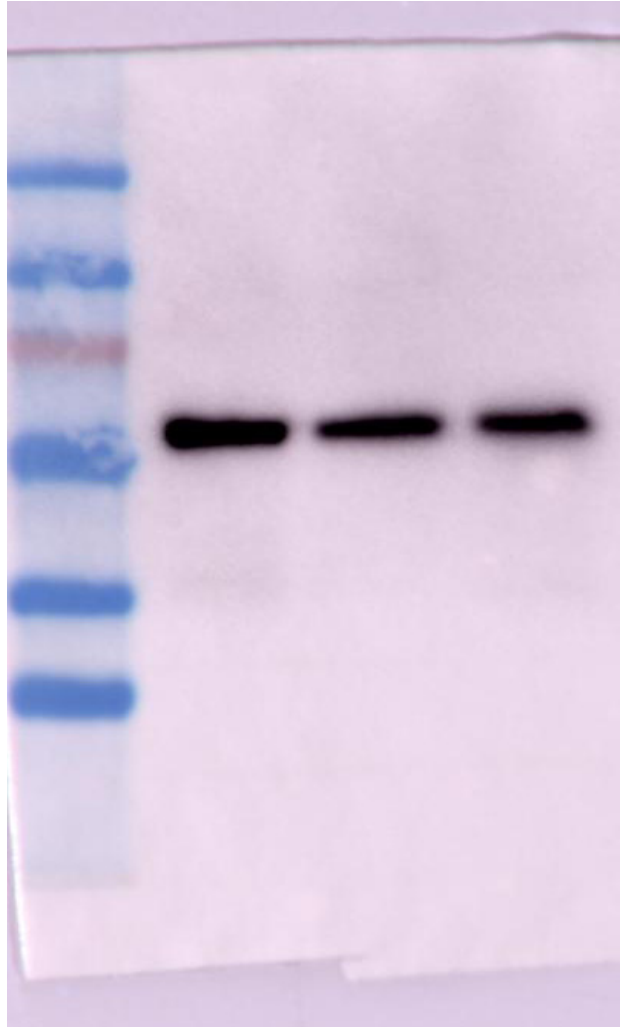

Supplement: 41419_2023_6071_MOESM2_ESM.pdf [file 41419_2023_6071_MOESM2_ESM.pdf]
