# Supplementary material for: Deletion of ARGLU1 causes global defects in alternative splicing in vivo and mouse cortical malformations primarily via apoptosis
Source: PubMed Central journal article supplement (PMC10447433; doi:10.1038/s41419-023-06071-w), 2023-08-23
Supplement: 41419_2023_6071_MOESM1_ESM.pdf [file 41419_2023_6071_MOESM1_ESM.pdf]

Deletion of ARGLU1 causes global defects in alternative splicing *in vivo* and mouse cortical malformations primarily via apoptosis

Fenyong Yao<sup>1,6</sup>, Shisheng Huang<sup>1,2,3,6</sup>, Jiahui Liu<sup>1,6</sup>, Chunhua Tan<sup>1,6</sup>, Mengqi Xu<sup>1</sup>, Dengkui Wang<sup>1</sup>, Maoqing Huang<sup>1</sup>, Yiyao Zhu<sup>4</sup>, Xingxu Huang<sup>1\*</sup>, and Shuijin He<sup>1,5\*</sup>

**Supplementary Figures:**

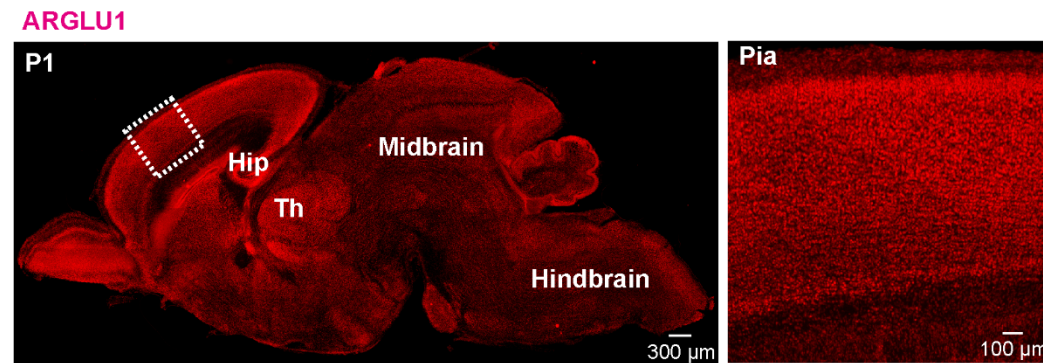

**Supplementary Figure 1: ARGLU1 expression in P1 mouse cortex.** Representative images of P1 cortices stained for ARGLU1 from WT mice. Right panel is expanded from the corresponding boxed region in the left. Hip, hippocampus; Th, thalamus; Pia, pia surface.

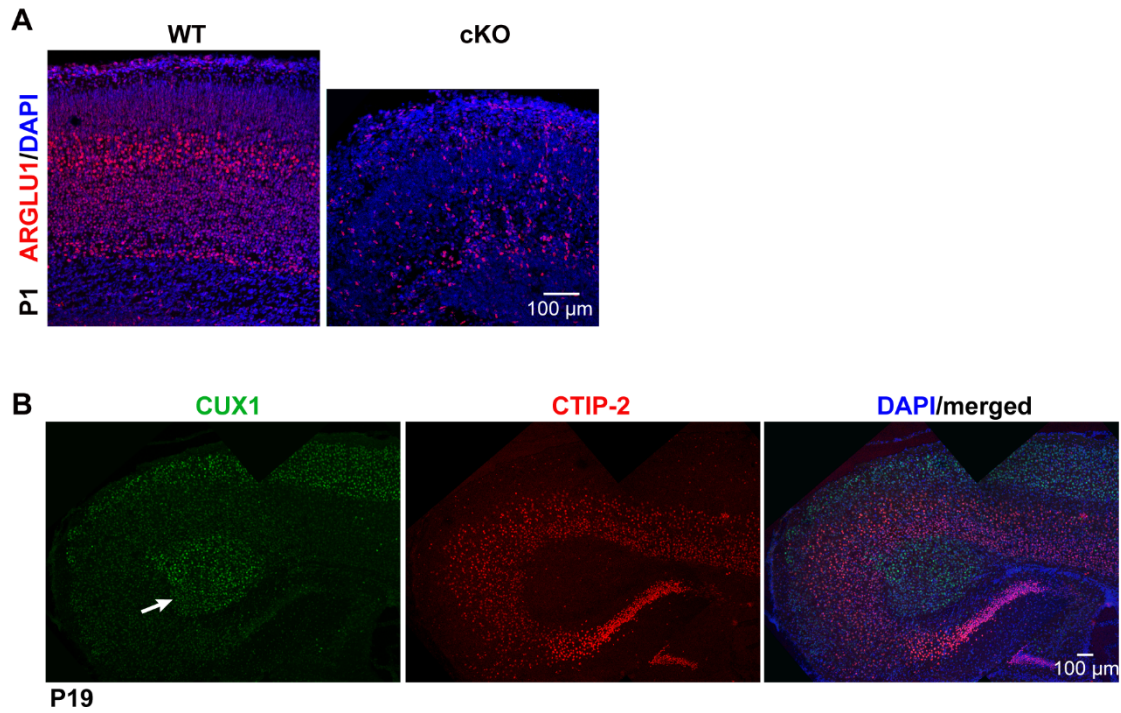

**Supplementary Figure 2: Validation of *Arglu1* deletion in the cortex.** (A) Representative images of P1 WT and cKO mouse cortices stained for ARGLU1. (B) Representative images showing a group of ectopic CUX1+ cells (arrow) located in the deep layer of cKO mouse cortex.

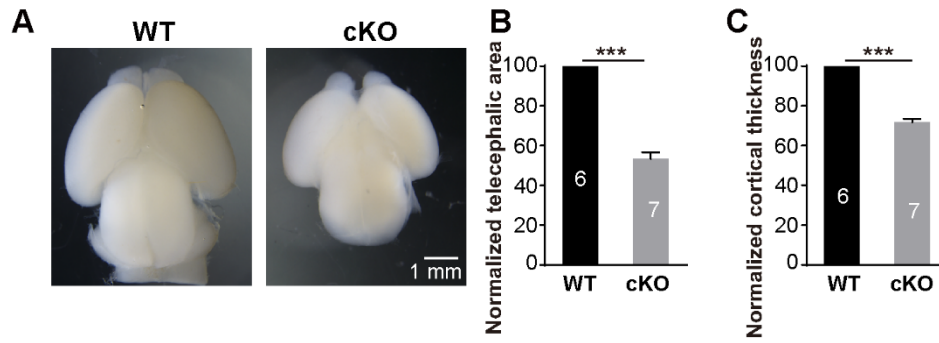

**Supplementary Figure 3: *Arglu1* deletion leads to reduced brain size at birth.** (A) Representative whole-mount images from WT and cKO mice at birth (P0.5). (B) Quantification of the telencephalic area of P0.5 WT and cKO brains (WT, n=6; cKO, n=7 mouse brains). (C) Quantification of cortical thickness of P0.5 WT and cKO mice (Cortex: WT, n=6; cKO, n=7 mouse brains). \*\*\*,  $P < 0.001$ , two-tailed student t-test.

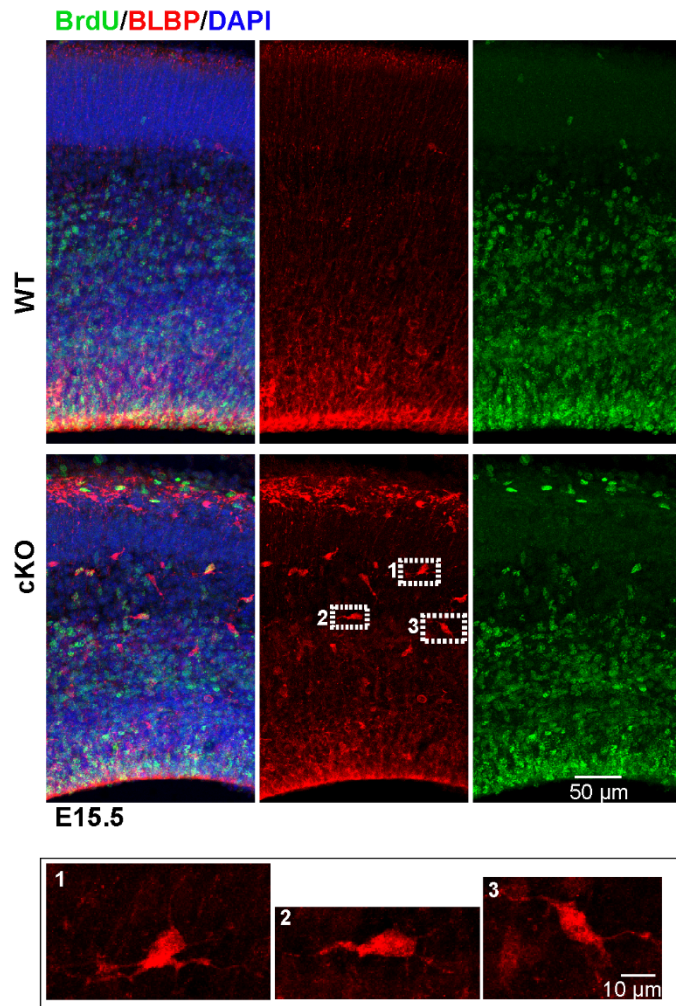

**Supplementary Figure 4: Delocalized BLBP-expressing cells in the cKO cortex.**

Mice were intraperitoneally injected with BrdU at E14.5. E15.5 embryo cortices were recovered for immunostaining of BLBP, a bona fide RG marker, and BrdU, showing that delocalized BLBP-expressing cells are positive for BrdU. The bottom panels enlarged from corresponding regions in the top cKO cortex show multipolar RGs.



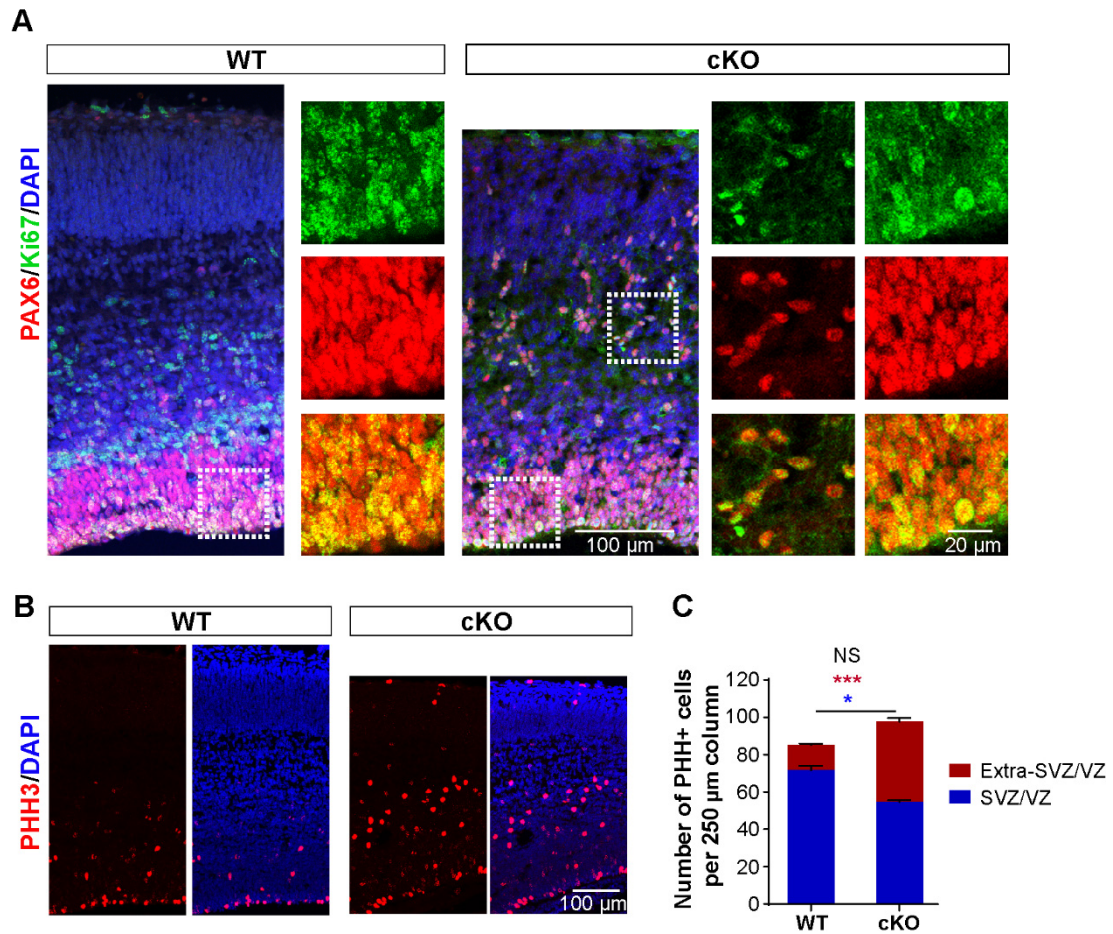

**Supplementary Figure 5: Ectopic RGs remain proliferative.** (A) Representative images of cortices stained for PAX6 and Ki67 in E16.5 WT and cKO brain sections. Boxed area are expanded into right panels. Arrow heads indicate delocalized RGs expressing PAX6 and Ki67 in cKO mice, suggesting that they are proliferative. (B, C) Representative images and quantification of a mitotic marker PHH3-positive cells in the cortices of E16.5 WT and cKO mice (WT, n=7; cKO, n=8 mouse brains). P values indicate significant differences of the number of total PHH3+ cells (*black*), in the VZ/SVZ (*blue*), and in the extra-VZ (*red*) between WT and cKO mice. Note that PHH3+ cells are delocalized in the cortical plate and the intermediate zone of cKO mice. \*,  $P < 0.05$ ; \*\*\*,  $P < 0.001$ , two-tailed student t-test. NS, not significant. Bar graph data are represented as mean  $\pm$  SEM.

## Supplementary Figure 6

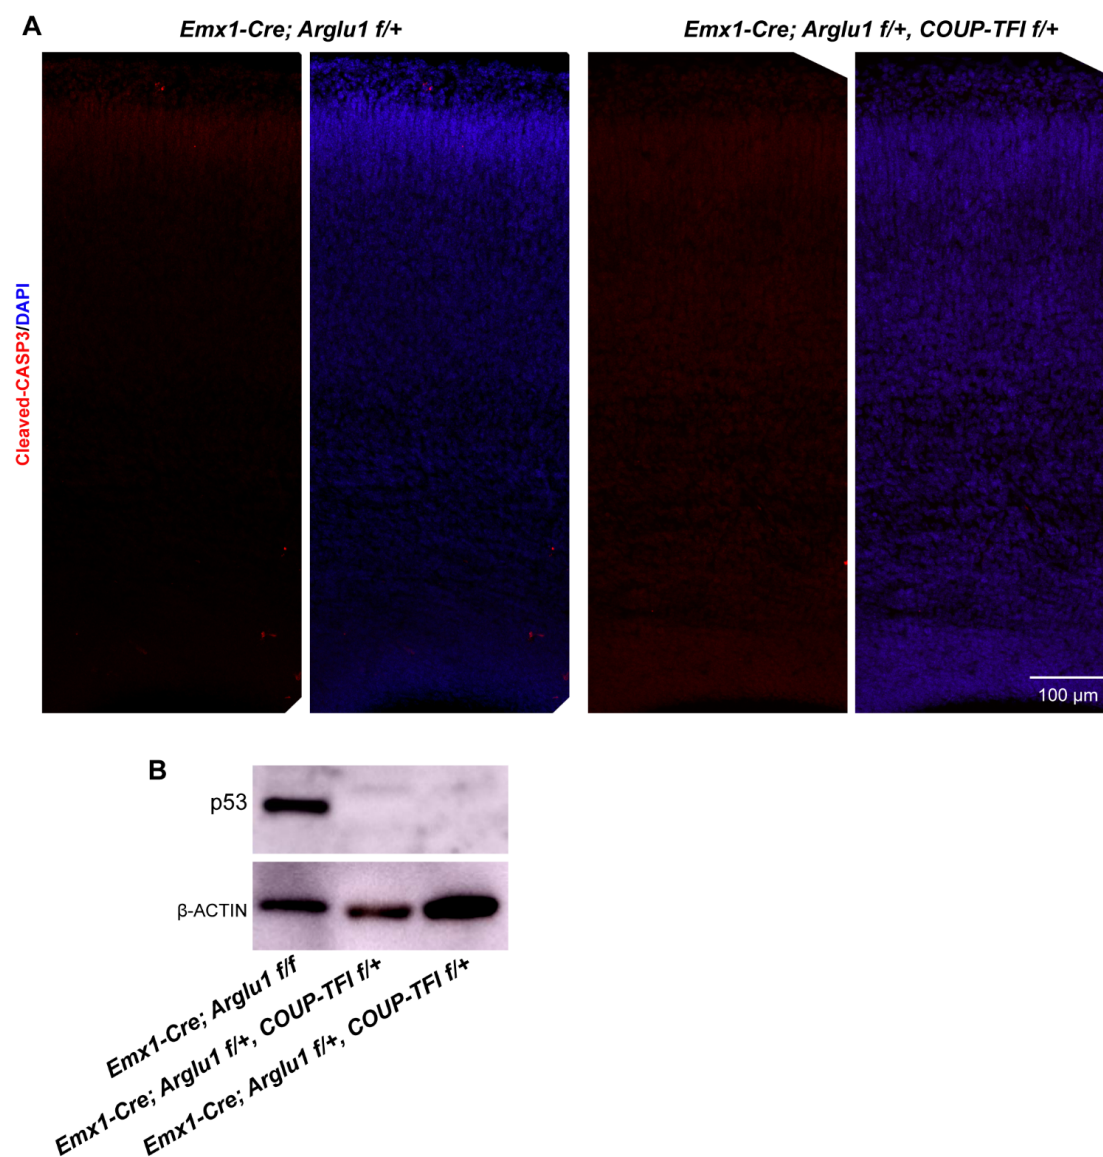

**Supplementary Figure 6: Emx1-Cre-dependent recombination does not induce cell apoptosis.** (A) Representative images of cortices stained for cleaved caspase-3 in E16.5 *Emx1-Cre;Arglu1<sup>f/+</sup>* or *Emx1-Cre;Arglu1<sup>f/+</sup>; COUP-TFI<sup>f/+</sup>* mouse brain sections. (B) Sample images of immunoblots of P0.5 cortical homogenates with antibody against p53 in *Emx1-Cre;Arglu1<sup>f/f</sup>*, *Emx1-Cre;Arglu1<sup>f/+</sup>* or *Emx1-Cre;Arglu1<sup>f/+</sup>; COUP-TFI<sup>f/+</sup>* mice. Experiments are replicated for 3 mice. Note that p53 is only expressed in *Arglu1* cKO mice other than the heterozygous mice containing the same number of loxp sites.

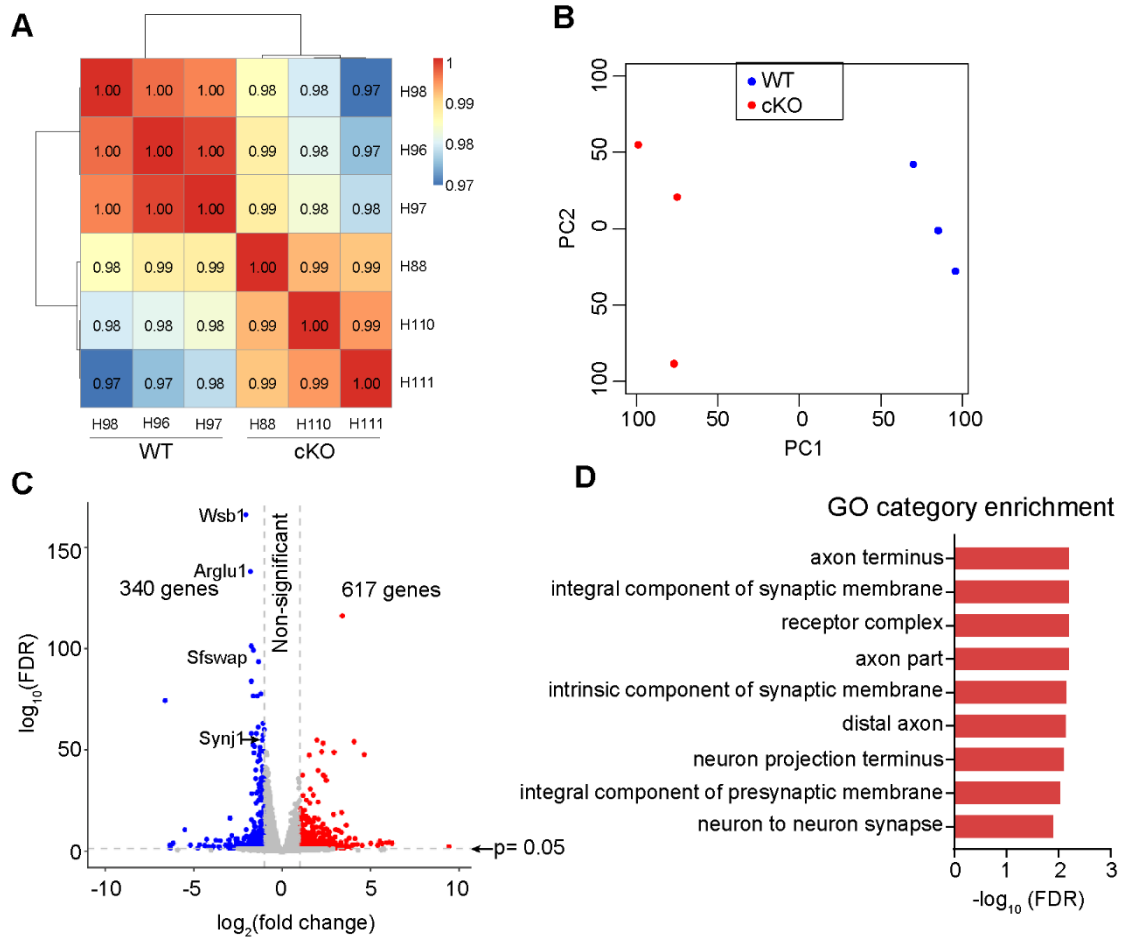

**Supplementary Figure 7: ARGLU1 regulates gene transcription *in vivo*.** Cluster (A) and principle analyses (B) show a significant correlation for data sets within WT or cKO groups, but not between WT and cKO groups, indicating RNA-seq data of good quality. (C) Volcano plot of  $\log_{10}(\text{FDR})$  versus  $\log_2(\text{fold change})$  for differentially expressed genes (also see Suppl. Table 1). Significance is defined as  $\text{Padj} < 0.05$ . Significant regulated genes are highlighted by red (Upregulated) and blue (Downregulated). (D) Gene ontology analyses of differential expressed genes showing enrichments in neuronal functions only for downregulated genes in cKO mice.

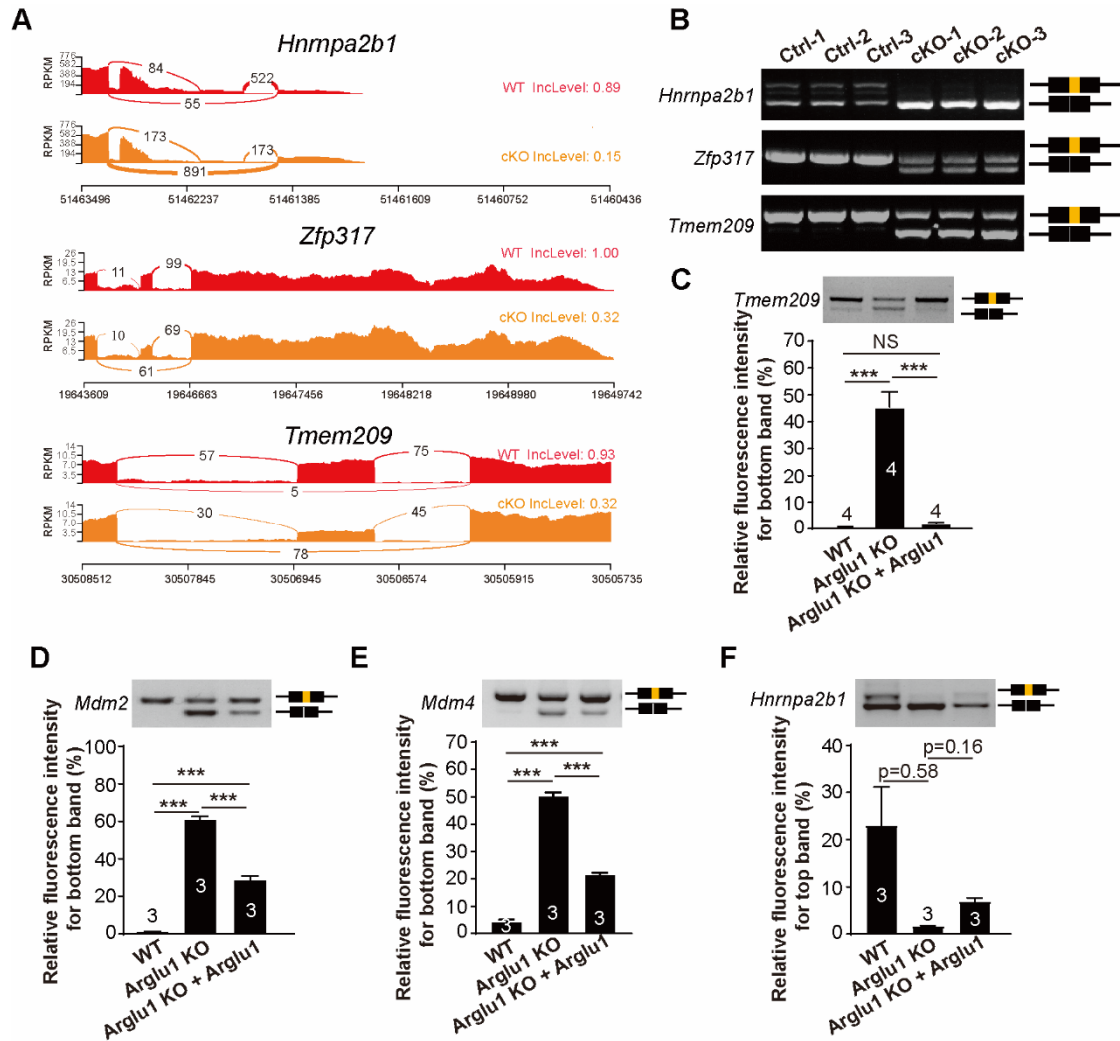

**Supplementary Figure 8: Re-expression of ARGLU1 partially rescues differential alternative splicing.** (A) Sashimi plots from bulk analyses showing alternatively spliced exons of *Hnrnpa2b1*, *Zfp317*, and *Tmem209*. (B) RT-PCR validation of *Hnrnpa2b1*, *Zfp317*, and *Tmem209*. (C-F) Representative images (*Top*) and quantification (*Bottom*) of RT-PCR showing alternatively spliced *Tmem209* (C), *Mdm2* (D), *Mdm4* (E), and *Hnrnpa2b1* (F) rescued by re-expression of ARGLU1 in *Arglu1* KO N2a cells. N number represents the number of experiments. \*\*\*,  $P < 0.001$ , one-way ANOVA with *post hoc* Bonferroni test. NS, not significant. Bar graphs are represented as mean  $\pm$  SEM.



## Supplementary Figure 9

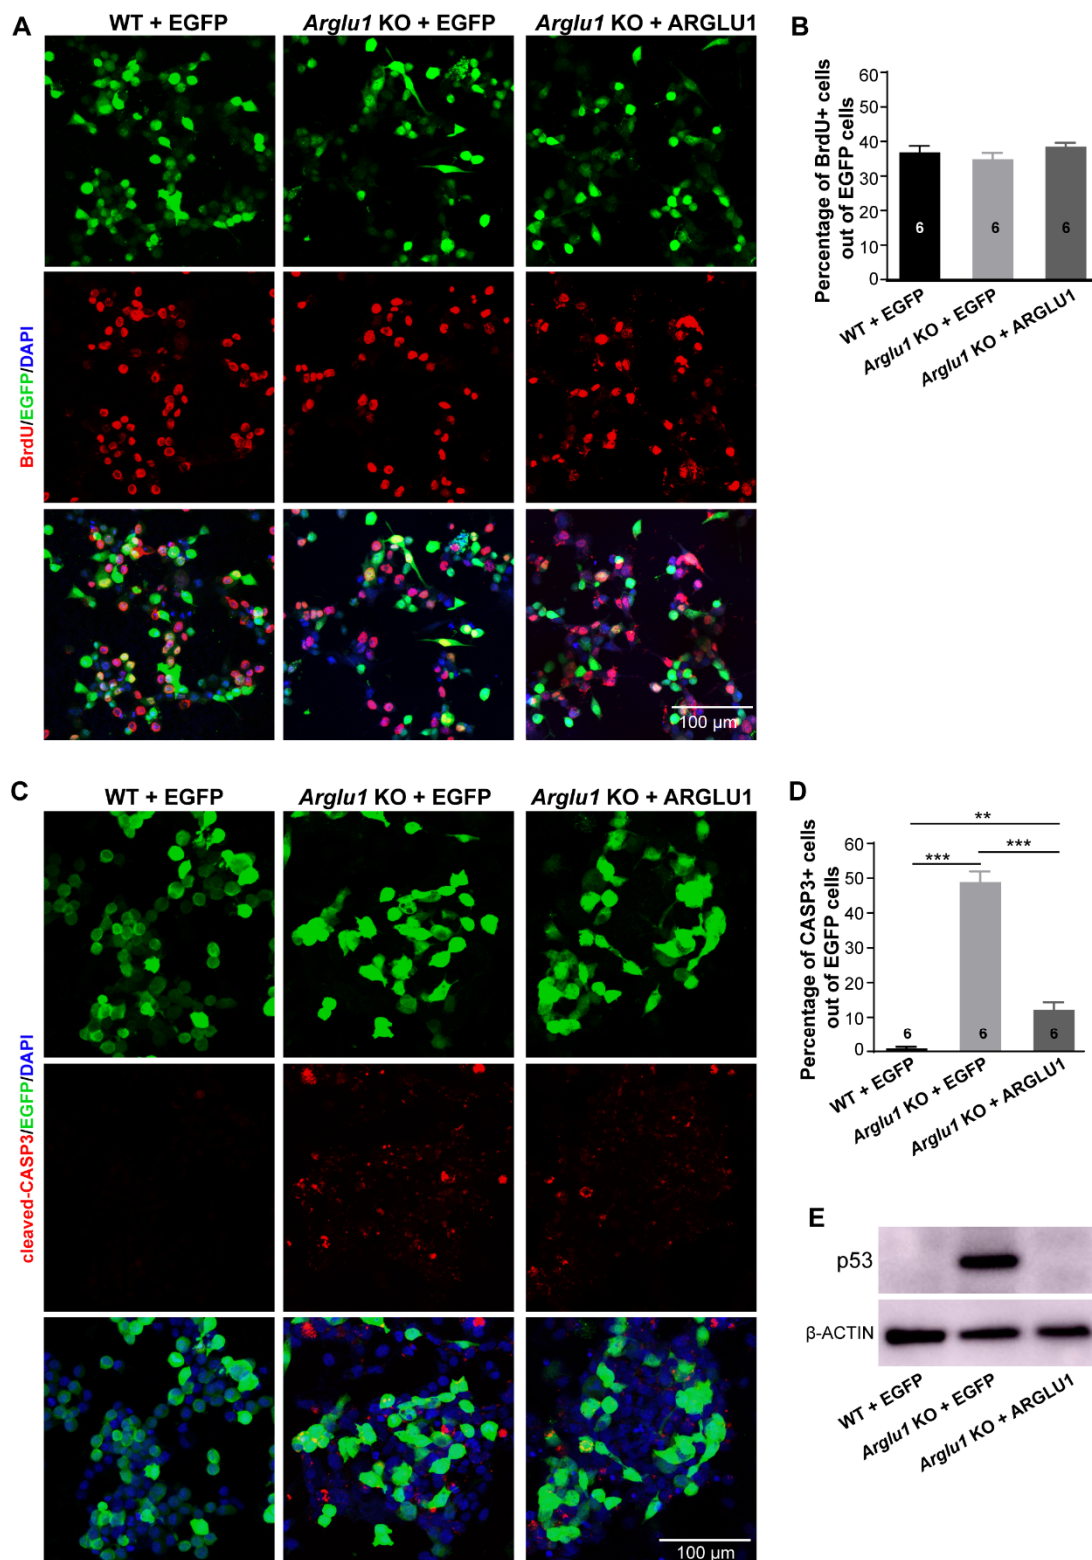

**Supplementary Figure 9: Re-expression of ARGLU1 largely rescues cell apoptosis in *Arglu1* KO N2a cells.** (A-D) Representative images of WT and *Arglu1* KO N2a cells with antibodies against BrdU (A), cleaved CASP3 (C) and quantification of percentage of BrdU+ cells (B) or CASP3+ cells (D) out of EGFP cells (B). N2a cells were fixed

with 4% PFA 36 hrs after transfection with plasmids expressing EGFP only or Arglu1-IRES-EGFP (WT EGFP, n=6; KO EGFP, n=6; KO ARGLU1-EGFP, n=6 cell cultures). (E) Representative images of immunoblots of N2a cell homogenates with antibody against p53 showing a complete rescue of p53 expression after re-expression of ARGLU1 in KO cells (3 cell culture replicates). \*\*, P < 0.01; \*\*\*, P < 0.001, one-way ANOVA with *post hoc* Bonferroni test. Bar graphs are represented as mean  $\pm$  SEM.

**Supplementary Table 1. The list of upregulated genes.**

| Gene Name     | log2FoldChange | padj      |
|---------------|----------------|-----------|
| B230216N24Rik | 3.40105948     | 7.27E-117 |
| Tmem86b       | 1.971829128    | 1.53E-55  |
| Slc15a3       | 4.062542664    | 9.43E-55  |
| Gm30223       | 2.318404022    | 6.02E-54  |
| Tgfbr3l       | 2.244854303    | 9.97E-50  |
| Gm5601        | 2.935021736    | 1.65E-49  |
| Dqx1          | 4.642375033    | 2.54E-48  |
| Gstm7         | 1.532875237    | 5.47E-48  |
| Fam107a       | 2.03500832     | 1.46E-40  |
| Gm5466        | 2.327137681    | 2.72E-38  |
| Gm14204       | 1.148928191    | 3.12E-38  |
| LOC105242595  | 2.385575029    | 9.93E-38  |
| Eda2r         | 2.491593107    | 1.30E-35  |
| LOC102640779  | 1.591950103    | 2.25E-31  |
| Psrc1         | 1.758597968    | 1.88E-28  |
| H19           | 1.177613119    | 3.11E-28  |
| Fuz           | 1.362938123    | 6.33E-26  |
| LOC105246114  | 2.037167756    | 7.23E-25  |
| Hif3a         | 1.564170676    | 1.90E-24  |
| Rbp1          | 1.047626508    | 1.51E-21  |
| P2ry1         | 1.262310779    | 6.03E-21  |
| Mbd3l2        | 3.363095719    | 9.49E-20  |
| Mt1           | 1.033002775    | 1.17E-19  |
| Htr3a         | 1.103036244    | 2.02E-19  |
| LOC108168236  | 2.907509145    | 8.90E-19  |
| Sult1a1       | 1.17887808     | 1.98E-18  |
| Nxph2         | 1.347366535    | 5.74E-18  |
| Net1          | 1.055191607    | 8.70E-18  |
| Peg10         | 1.05847877     | 2.78E-17  |
| Gm30807       | 1.836485794    | 4.37E-17  |
| Gm14634       | 1.482758493    | 7.97E-17  |
| Mttp          | 1.318404427    | 1.06E-16  |
| Msh5          | 2.053592956    | 1.59E-16  |
| Isl1          | 1.084196553    | 1.63E-16  |
| Cd163         | 1.560870416    | 4.09E-16  |
| 4930581F22Rik | 1.759471864    | 2.85E-15  |
| 2810468N07Rik | 1.439817897    | 5.28E-15  |
| Mc5r          | 1.619075527    | 6.30E-15  |
| Fam71e1       | 1.006178146    | 7.02E-15  |
| Zfp503        | 1.074826546    | 1.90E-14  |
| Gm32178       | 2.313065869    | 4.28E-14  |
| Rpa3          | 1.295895523    | 9.30E-14  |
| Vax1          | 1.138318185    | 1.17E-13  |
| Gm40668       | 3.6210356      | 1.69E-13  |
| Gm40346       | 1.712196644    | 1.02E-12  |
| 4933421O10Rik | 1.009675367    | 1.37E-12  |
| Lrrc29        | 1.948794344    | 1.53E-12  |
| Tas1r3        | 2.181284019    | 1.59E-12  |
| Gm40688       | 1.830536153    | 1.91E-12  |
| Gm41409       | 2.495349674    | 9.99E-12  |
| Gm15517       | 2.331347351    | 2.13E-11  |



|               |             |          |
|---------------|-------------|----------|
| Hspb8         | 1.182500473 | 2.63E-11 |
| LOC108167641  | 3.028097051 | 2.79E-11 |
| Jpx           | 1.065479212 | 4.15E-11 |
| Ms4a6c        | 1.732996508 | 4.91E-11 |
| Piwil2        | 3.172638012 | 5.52E-11 |
| Gm38524       | 1.047433536 | 1.24E-10 |
| Ssc4d         | 1.757688824 | 1.33E-10 |
| Gm39534       | 2.632103813 | 2.28E-10 |
| Sp3os         | 1.062153173 | 3.69E-10 |
| Gm32214       | 2.67896897  | 4.23E-10 |
| Lacc1         | 1.351486762 | 5.54E-10 |
| Gm12312       | 3.350734291 | 6.13E-10 |
| Avil          | 2.064802015 | 6.87E-10 |
| Trim72        | 2.646139561 | 7.88E-10 |
| Gm13251       | 1.758549811 | 8.12E-10 |
| Gm40721       | 1.497256332 | 8.76E-10 |
| Myrf          | 1.762981977 | 9.36E-10 |
| Gm32896       | 1.537825384 | 1.17E-09 |
| Gm41901       | 2.290431175 | 1.43E-09 |
| Alox15        | 1.064485289 | 1.50E-09 |
| Pdk4          | 1.356264461 | 4.63E-09 |
| Dlk1          | 1.217144205 | 5.43E-09 |
| Gm38639       | 1.603186635 | 6.08E-09 |
| Gm34696       | 1.085045277 | 6.18E-09 |
| Tmem176a      | 1.225216443 | 6.80E-09 |
| Gm15834       | 1.596919021 | 7.08E-09 |
| Map3k6        | 1.434371414 | 1.00E-08 |
| Ccdc122       | 2.442424398 | 1.08E-08 |
| Spp1          | 1.131700681 | 1.90E-08 |
| Gm4285        | 1.369281517 | 2.23E-08 |
| Wbscr27       | 1.114356649 | 2.30E-08 |
| Gm39099       | 1.872292949 | 2.42E-08 |
| Galnt4        | 1.009937313 | 2.96E-08 |
| Gm38504       | 1.193327203 | 4.20E-08 |
| LOC108169121  | 2.641656641 | 5.40E-08 |
| Junos         | 1.243405003 | 6.27E-08 |
| C230037L18Rik | 1.697413447 | 7.28E-08 |
| Tspo2         | 2.335519021 | 8.28E-08 |
| Acer2         | 1.3199726   | 8.58E-08 |
| 9530062K07Rik | 3.000616209 | 1.21E-07 |
| 4933407L21Rik | 1.200627425 | 1.23E-07 |
| Ppp1r14a      | 1.604744946 | 1.63E-07 |
| 2610318N02Rik | 1.211491885 | 1.70E-07 |
| A930033H14Rik | 1.006797529 | 1.86E-07 |
| Rbm20         | 1.057175782 | 1.97E-07 |
| Mal           | 1.749974805 | 2.34E-07 |
| Dcxr          | 1.283946808 | 2.73E-07 |
| LOC108168069  | 1.278453703 | 2.96E-07 |
| Cyp4x1os      | 2.171711683 | 3.17E-07 |
| Trim63        | 2.725896024 | 3.43E-07 |
| LOC108167831  | 3.784090629 | 4.13E-07 |
| Gpr35         | 1.805920614 | 4.84E-07 |
| Ccdc188       | 1.413872887 | 4.91E-07 |

|               |             |          |
|---------------|-------------|----------|
| Gm40167       | 1.262301102 | 4.99E-07 |
| Gm10516       | 1.122977701 | 5.95E-07 |
| Gm40820       | 2.683694892 | 6.03E-07 |
| Lhcgr         | 1.259076963 | 6.40E-07 |
| Nqo1          | 1.14521786  | 6.52E-07 |
| Gm35422       | 4.113131138 | 7.17E-07 |
| LOC108167446  | 1.817789279 | 9.49E-07 |
| Aspg          | 1.732113024 | 9.85E-07 |
| Hist1h2ai     | 2.269089373 | 1.01E-06 |
| 2900052N01Rik | 1.298239656 | 1.02E-06 |
| Deptor        | 1.136777806 | 1.21E-06 |
| Sytl5         | 1.081759752 | 1.51E-06 |
| Gm19554       | 1.163569313 | 1.77E-06 |
| Gm35002       | 2.883356632 | 1.88E-06 |
| Gzmm          | 1.289062236 | 2.02E-06 |
| Fgfbp1        | 1.196189871 | 2.27E-06 |
| Tceanc        | 1.066273751 | 2.47E-06 |
| Slc2a4        | 1.27695107  | 3.23E-06 |
| Gm31953       | 1.507660256 | 3.67E-06 |
| Gm33195       | 1.318648048 | 3.82E-06 |
| Wfdc1         | 1.253114911 | 3.84E-06 |
| Spag16        | 1.635667515 | 3.86E-06 |
| Gm9925        | 1.395390957 | 3.87E-06 |
| Ccdc78        | 1.457646701 | 3.95E-06 |
| LOC108167693  | 1.471134463 | 4.60E-06 |
| A430105J06Rik | 1.328796804 | 4.79E-06 |
| Gm31639       | 3.6303895   | 5.34E-06 |
| Brs3          | 2.061507542 | 5.47E-06 |
| Sgms2         | 1.168510656 | 5.61E-06 |
| Adrb2         | 1.958326748 | 6.15E-06 |
| Gm30259       | 1.15261741  | 6.30E-06 |
| Ms4a6b        | 1.544336493 | 6.42E-06 |
| 5330434G04Rik | 1.015348955 | 7.07E-06 |
| Gm41313       | 2.436660964 | 7.22E-06 |
| Gm34418       | 1.773442537 | 7.40E-06 |
| Ang           | 2.139141849 | 7.61E-06 |
| Gm12279       | 1.196617173 | 7.62E-06 |
| Lrp8os2       | 1.041528259 | 9.63E-06 |
| Gm33648       | 2.221485786 | 1.01E-05 |
| Gm32666       | 5.517808628 | 1.07E-05 |
| Tstd1         | 1.342957527 | 1.18E-05 |
| Troap         | 1.001349908 | 1.22E-05 |
| Ly6a          | 1.668264362 | 1.30E-05 |
| Gm32934       | 1.823111435 | 1.31E-05 |
| Galnt15       | 1.271482989 | 1.31E-05 |
| Edn1          | 1.768186965 | 1.39E-05 |
| Gm4988        | 1.619003286 | 1.47E-05 |
| Gm16907       | 1.236179928 | 1.65E-05 |
| Gm30604       | 2.552746251 | 1.73E-05 |
| Gm39423       | 1.784366966 | 1.75E-05 |
| Gm31282       | 1.102437534 | 1.75E-05 |
| Gm41350       | 1.679232461 | 1.81E-05 |
| Cox6b2        | 1.18691756  | 1.85E-05 |

|               |             |          |
|---------------|-------------|----------|
| Fhad1         | 1.431258701 | 1.87E-05 |
| Gm29948       | 1.395680593 | 1.89E-05 |
| Gm36146       | 1.985455587 | 1.90E-05 |
| Gm42253       | 2.146316807 | 1.91E-05 |
| Susd2         | 1.52840473  | 1.91E-05 |
| Gm11755       | 2.529870196 | 2.09E-05 |
| Aass          | 2.044350277 | 2.09E-05 |
| Rmst          | 1.150397646 | 2.11E-05 |
| LOC108168162  | 2.784308874 | 2.12E-05 |
| LOC102641980  | 1.067450657 | 2.19E-05 |
| Car14         | 1.000213417 | 2.32E-05 |
| 4833418N02Rik | 1.057970513 | 2.33E-05 |
| Eqtn          | 1.358360354 | 2.35E-05 |
| Ms4a4a        | 1.662655749 | 2.38E-05 |
| Dmrtc1a       | 1.590446801 | 2.64E-05 |
| 5031426D15Rik | 1.483156199 | 2.64E-05 |
| Gm40578       | 1.05116873  | 2.72E-05 |
| 2610020C07Rik | 1.011096617 | 2.72E-05 |
| LOC108167924  | 1.098905644 | 2.75E-05 |
| Gm28905       | 1.775956468 | 2.93E-05 |
| Gm39883       | 1.205849479 | 2.94E-05 |
| Rsph4a        | 1.099268909 | 3.05E-05 |
| Gm13241       | 1.417454784 | 3.22E-05 |
| Gm40826       | 2.135185672 | 3.46E-05 |
| 1700019B03Rik | 2.25504585  | 3.54E-05 |
| Tmem45b       | 3.311360041 | 3.77E-05 |
| Ooep          | 1.074082807 | 3.83E-05 |
| Pm20d1        | 2.230255034 | 3.85E-05 |
| Gm42270       | 6.073303872 | 3.98E-05 |
| Ush1c         | 1.39447807  | 4.00E-05 |
| Prss41        | 1.745331923 | 4.26E-05 |
| Gm7972        | 1.218889743 | 4.56E-05 |
| Gm40573       | 2.157652749 | 4.72E-05 |
| Itga11        | 1.033270941 | 4.73E-05 |
| Gm14210       | 6.007105881 | 4.83E-05 |
| Speer4b       | 2.962733945 | 5.09E-05 |
| Lmod1         | 1.757287225 | 5.35E-05 |
| Txnip         | 1.101894133 | 5.37E-05 |
| Grin3b        | 1.289162246 | 5.47E-05 |
| Crispld2      | 1.402028013 | 5.60E-05 |
| Gm33097       | 1.605220721 | 5.60E-05 |
| Acta1         | 1.053069321 | 5.82E-05 |
| Gm15510       | 1.266133257 | 5.82E-05 |
| Dleu2         | 1.11816923  | 6.02E-05 |
| BC030499      | 3.323971876 | 6.11E-05 |
| Gm32650       | 2.748800045 | 6.16E-05 |
| Pdzd9         | 1.288911966 | 6.33E-05 |
| H2afb3        | 5.916489845 | 6.34E-05 |
| Gm38480       | 1.442938976 | 6.55E-05 |
| Neat1         | 1.212473189 | 7.05E-05 |
| LOC108168876  | 2.010879618 | 7.29E-05 |
| Arhgap40      | 1.669042366 | 7.57E-05 |
| Gm32555       | 1.505525658 | 7.81E-05 |

|               |             |             |
|---------------|-------------|-------------|
| Ifi44l        | 6.209739772 | 8.09E-05    |
| E230029C05Rik | 1.796721889 | 8.09E-05    |
| Gm41795       | 2.353005169 | 8.58E-05    |
| Fbxo36        | 1.292499196 | 8.77E-05    |
| Gm41848       | 1.090069598 | 8.88E-05    |
| Duxbl1        | 1.1656745   | 9.59E-05    |
| Abcb4         | 1.272251378 | 9.90E-05    |
| Dennd1c       | 1.847175471 | 0.000100255 |
| Gm35782       | 1.41088387  | 0.000102661 |
| Gm4890        | 1.353598672 | 0.000116477 |
| Gm30712       | 2.906648911 | 0.000118504 |
| Eno1b         | 6.20949994  | 0.00013189  |
| LOC105247048  | 2.288425503 | 0.000137068 |
| Gm3134        | 1.003514072 | 0.000143275 |
| Gm16432       | 1.191134696 | 0.000143285 |
| Gm42048       | 1.986877588 | 0.000151024 |
| Mir708        | 5.013787938 | 0.000152294 |
| Ldhd          | 1.61149149  | 0.000153758 |
| A330069E16Rik | 1.282792643 | 0.000155696 |
| 4933406C10Rik | 1.282538677 | 0.000166173 |
| Gstm2         | 1.037407391 | 0.000168913 |
| Gm12522       | 1.936990401 | 0.000176452 |
| Gcnt1         | 1.306439064 | 0.000177046 |
| Gsx2          | 1.24512083  | 0.000178916 |
| Vwa7          | 2.12010857  | 0.000189164 |
| Myot          | 5.661641908 | 0.000205694 |
| Gm39663       | 3.296388411 | 0.000232886 |
| LOC108168201  | 2.213382641 | 0.00023743  |
| Gm32186       | 2.03377543  | 0.000242836 |
| Gm31532       | 1.711486068 | 0.000246362 |
| LOC102640468  | 1.965595028 | 0.000250837 |
| Gm13477       | 2.197835087 | 0.000255035 |
| Gm32687       | 1.213311228 | 0.0002563   |
| Tvp23bos      | 2.351640645 | 0.000284774 |
| 0610040B10Rik | 1.112110227 | 0.000293115 |
| Gm34343       | 1.948917767 | 0.000302032 |
| LOC328448     | 1.283926    | 0.000306229 |
| A830052D11Rik | 1.296286611 | 0.000307947 |
| Art5          | 2.551862791 | 0.000319807 |
| Gm16124       | 2.237603468 | 0.000329193 |
| LOC102632778  | 1.319355949 | 0.000339914 |
| Samd3         | 1.491613345 | 0.000346982 |
| Gm36195       | 1.262077106 | 0.000357096 |
| Lmntd2        | 1.99898917  | 0.000362199 |
| Gm40054       | 2.400064837 | 0.00038455  |
| 1700067K01Rik | 1.317660091 | 0.000391817 |
| Gm42047       | 2.082269374 | 0.000393765 |
| LOC108168753  | 2.397836442 | 0.000402575 |
| Gatsl3        | 1.190990768 | 0.000416346 |
| Gm39059       | 2.531515253 | 0.000416873 |
| Gm11423       | 1.646655559 | 0.000419107 |
| Gm36500       | 1.219080057 | 0.000419612 |
| Gm3519        | 2.64418878  | 0.000420358 |

|               |             |             |
|---------------|-------------|-------------|
| Nkx2-3        | 1.207190901 | 0.000422603 |
| LOC102636393  | 2.310053185 | 0.000429923 |
| Gm10182       | 4.236930826 | 0.000432364 |
| Baat          | 2.669754736 | 0.000437195 |
| Prok2         | 1.59940778  | 0.000444827 |
| Ttll13        | 1.485253728 | 0.000465849 |
| Sapcd1        | 1.88067989  | 0.000472307 |
| Gm33583       | 1.16640315  | 0.000474708 |
| 5830403F22Rik | 1.879829593 | 0.000483215 |
| Col9a1        | 1.015656542 | 0.000488069 |
| Gm39275       | 3.044569502 | 0.000504066 |
| 4933432I09Rik | 1.749113008 | 0.000548999 |
| Gm41338       | 1.635650248 | 0.000549131 |
| 8430408G22Rik | 1.935609029 | 0.000597229 |
| Tcte2         | 1.161244193 | 0.000614044 |
| Gm30122       | 1.506651578 | 0.000620557 |
| Gm41297       | 2.187179134 | 0.000627678 |
| Hmgn2-ps1     | 4.060599721 | 0.000652021 |
| Gm17769       | 1.241475182 | 0.000653116 |
| Gm32302       | 2.829023119 | 0.000660525 |
| C1s1          | 1.610266232 | 0.000661104 |
| Gm32151       | 1.611175945 | 0.000674541 |
| Apoc1         | 1.98400297  | 0.0006788   |
| G630064G18Rik | 2.398665024 | 0.000686485 |
| Myh6          | 1.201782705 | 0.00071119  |
| Gm11944       | 1.124838079 | 0.000713791 |
| 5031434O11Rik | 1.291854646 | 0.000738458 |
| Gm41466       | 1.552424136 | 0.000763741 |
| LOC108168353  | 1.750883608 | 0.000767564 |
| LOC108168067  | 1.505581182 | 0.000797293 |
| Sycp3         | 1.362850197 | 0.000802772 |
| Gm12781       | 1.337364486 | 0.000857878 |
| Olfr658       | 3.002643267 | 0.000870868 |
| Tspan32       | 2.358174185 | 0.000879742 |
| D730003I15Rik | 1.081044913 | 0.000892327 |
| Gm34421       | 2.182996605 | 0.000893499 |
| Th            | 1.182955979 | 0.000895292 |
| Gm7931        | 1.901740143 | 0.000906006 |
| Gm42225       | 2.169682617 | 0.000908864 |
| Gm27239       | 1.143725124 | 0.000923867 |
| Rmi2          | 1.519808913 | 0.000962944 |
| LOC102640250  | 1.237985811 | 0.000978369 |
| Ribc1         | 1.386529975 | 0.00098119  |
| Acad12        | 1.530551818 | 0.000986712 |
| Gm29711       | 2.562550519 | 0.001009204 |
| Hspb1         | 1.089473129 | 0.001056768 |
| LOC108168402  | 1.630330623 | 0.001062651 |
| Gm17224       | 1.151013138 | 0.001076932 |
| Gm38648       | 1.637989489 | 0.001104741 |
| Gm39021       | 3.60108407  | 0.001125549 |
| Gm30335       | 3.02663856  | 0.001172657 |
| Fscn2         | 1.235928539 | 0.001181085 |
| Gm39252       | 2.844592927 | 0.001209003 |

|               |             |             |
|---------------|-------------|-------------|
| Gm28578       | 3.94278114  | 0.001248865 |
| Car3          | 1.784260659 | 0.001318308 |
| Gm36210       | 1.3676323   | 0.001319628 |
| Apol8         | 1.577874977 | 0.001349191 |
| Gm38447       | 2.8713182   | 0.001372032 |
| Gm6724        | 5.405142102 | 0.001394006 |
| Gm10421       | 1.14126172  | 0.001448524 |
| Gm17382       | 1.806585994 | 0.00145522  |
| Angptl7       | 1.594486228 | 0.001504101 |
| Cd86          | 1.436017885 | 0.001603316 |
| Frmf7         | 1.467355249 | 0.001620817 |
| Gm41145       | 4.523738786 | 0.001629641 |
| Rbm47         | 1.068559347 | 0.001677433 |
| Gm40269       | 1.705424647 | 0.001697343 |
| Gm36193       | 3.27801197  | 0.001709765 |
| Gm26559       | 1.490300011 | 0.001788635 |
| 1700019L22Rik | 1.189063266 | 0.001815902 |
| Sult5a1       | 2.171898936 | 0.001826513 |
| Gm38440       | 1.13275772  | 0.001827258 |
| Rab11fip1     | 1.24816583  | 0.001832498 |
| Hist1h3a      | 2.503590434 | 0.001892499 |
| Casc1         | 1.028844446 | 0.001912311 |
| Ephx2         | 1.032241767 | 0.001945217 |
| Aire          | 1.93115533  | 0.002077883 |
| 4930513L16Rik | 1.972191556 | 0.002278062 |
| Inca1         | 1.269961852 | 0.002324849 |
| Gm41512       | 1.398615358 | 0.002351022 |
| Acap1         | 1.154562929 | 0.002358582 |
| Masp2         | 2.407246137 | 0.002371964 |
| LOC108167456  | 1.850708049 | 0.002418545 |
| LOC102640042  | 1.808683765 | 0.002451884 |
| Gm39030       | 1.104611062 | 0.002457731 |
| Gm30690       | 1.675059891 | 0.002470682 |
| Tex29         | 1.487059528 | 0.002651624 |
| A930007I19Rik | 1.110002794 | 0.002654732 |
| LOC102632415  | 1.43688139  | 0.002665487 |
| Gm11827       | 1.837012585 | 0.00272069  |
| Sifnl1        | 2.82932221  | 0.002779538 |
| 4930412L05Rik | 1.27765341  | 0.002803236 |
| Rbp4          | 1.256451144 | 0.002803236 |
| Erich2        | 1.284714036 | 0.002890773 |
| Gm39224       | 2.071840553 | 0.00312409  |
| Slc52a3       | 1.288822174 | 0.003130827 |
| Nr1h3         | 1.287883468 | 0.003134856 |
| Plekhf1       | 1.582926637 | 0.003144694 |
| Xrra1         | 1.248070879 | 0.003155273 |
| Aicda         | 1.551265353 | 0.003208794 |
| Gm30188       | 1.755841988 | 0.003224271 |
| Col14a1       | 1.012221563 | 0.003237908 |
| Gm36696       | 1.829461008 | 0.003341747 |
| Kdm4d         | 1.263308581 | 0.003464998 |
| Mpp4          | 1.130402989 | 0.00347961  |
| Tdrd9         | 1.43962603  | 0.003504496 |

|               |             |             |
|---------------|-------------|-------------|
| Mroh7         | 1.01408073  | 0.003720395 |
| Gm17102       | 1.144100662 | 0.003724407 |
| Steap4        | 1.826351567 | 0.00380887  |
| Gm34571       | 2.519210826 | 0.003897351 |
| n-TWcca1      | 3.756396163 | 0.003925504 |
| Calml4        | 1.050934084 | 0.003936663 |
| Mocos         | 1.811174277 | 0.004107443 |
| Gm41215       | 2.46304538  | 0.004139811 |
| Sspo          | 1.409300742 | 0.004171437 |
| Gm38434       | 1.843198166 | 0.004229274 |
| Gm30055       | 1.467387707 | 0.004302475 |
| Scgn          | 2.019033945 | 0.004402056 |
| Gm11223       | 3.680783958 | 0.004407631 |
| Gm29443       | 2.561886436 | 0.004509812 |
| Tmem252       | 1.029081456 | 0.004606786 |
| Mtl5          | 1.30644616  | 0.004623241 |
| Sytl1         | 1.920774958 | 0.004723816 |
| Gm34354       | 1.015286267 | 0.004726399 |
| Trim30d       | 1.363278128 | 0.004744573 |
| Ldlrad1       | 3.717809745 | 0.004803745 |
| LOC102639143  | 3.638799722 | 0.004949457 |
| Cdkn2b        | 1.58418416  | 0.005119443 |
| Gm39194       | 1.119660202 | 0.005158862 |
| Gm42145       | 1.614827026 | 0.005202952 |
| Rpph1         | 2.865842271 | 0.005209204 |
| Gm14154       | 3.393009521 | 0.005215665 |
| D330037F02Rik | 3.050552634 | 0.005366915 |
| Gm34851       | 1.238225884 | 0.005385951 |
| Gm34917       | 1.186905166 | 0.005421757 |
| Padi4         | 9.428526624 | 0.005698267 |
| Dnaic1        | 1.183603948 | 0.005698267 |
| Gm41024       | 1.894221896 | 0.005747946 |
| Gm30352       | 1.282422694 | 0.005753126 |
| BC106179      | 1.245699655 | 0.005947039 |
| Slco1b2       | 2.173594982 | 0.005982848 |
| Catsperg2     | 1.530261921 | 0.005995099 |
| Gm42202       | 1.973234211 | 0.006030292 |
| Rn7sk         | 1.640702056 | 0.006096866 |
| Gm38766       | 1.078796783 | 0.006216637 |
| Prr22         | 1.169749356 | 0.006319332 |
| Gm38956       | 1.77044813  | 0.006322048 |
| Gm33487       | 1.639944763 | 0.006322048 |
| Acpt          | 1.344006336 | 0.006338115 |
| Gm10698       | 1.15229875  | 0.006415328 |
| LOC102639568  | 1.211378137 | 0.006455057 |
| Akr1b8        | 1.329285949 | 0.006474155 |
| Gm36523       | 2.104900827 | 0.006516101 |
| AA465934      | 1.135931983 | 0.006574872 |
| Gm2027        | 2.610144011 | 0.006800098 |
| Gm32793       | 1.300773893 | 0.006817863 |
| Gm30455       | 1.852203133 | 0.006862615 |
| Prg4          | 1.07146819  | 0.0069401   |
| Tbc1d21       | 3.043314777 | 0.007059166 |



|               |             |             |
|---------------|-------------|-------------|
| Gsto2         | 1.790968476 | 0.007158876 |
| Gm34979       | 1.259811778 | 0.007182526 |
| Gm35566       | 1.699361205 | 0.007208809 |
| Gm38664       | 1.243312688 | 0.007425138 |
| Hist1h4d      | 1.822204402 | 0.007438878 |
| Gm42063       | 1.029342032 | 0.007787016 |
| Gm31966       | 2.229338827 | 0.007835516 |
| Cilp          | 2.090246865 | 0.007996218 |
| Gm39530       | 1.349876593 | 0.008037671 |
| Gm39850       | 2.987002301 | 0.008038621 |
| 1700007L15Rik | 1.805188266 | 0.008070995 |
| P2ry14        | 1.22713446  | 0.008072366 |
| Tgm4          | 1.449226054 | 0.008208575 |
| Ppp3r2        | 1.706787613 | 0.008225604 |
| C130060C02Rik | 1.64931204  | 0.008228034 |
| Edar          | 1.136433548 | 0.008270355 |
| Gm29938       | 1.747228564 | 0.008281054 |
| Gpr65         | 2.028741567 | 0.008307347 |
| Rpl29-ps2     | 1.636727709 | 0.00850186  |
| Mc1r          | 1.116733332 | 0.008516    |
| Ptgir         | 2.95742335  | 0.008769201 |
| Gm16894       | 1.241441921 | 0.008950766 |
| Hist1h2bj     | 2.45898172  | 0.009069894 |
| Gm31862       | 1.408530588 | 0.009190016 |
| Gm26793       | 1.380935411 | 0.009230553 |
| Gm33250       | 1.105772428 | 0.009652671 |
| Msx2          | 1.864683969 | 0.009805066 |
| Sptbn5        | 1.404314575 | 0.009987382 |
| Efcab8        | 2.654043527 | 0.010309996 |
| Spem1         | 1.780898446 | 0.010643769 |
| Gm31054       | 1.470513186 | 0.010847979 |
| Gm34278       | 1.62728606  | 0.011136933 |
| LOC108167657  | 2.003694987 | 0.011252882 |
| lbsp          | 1.642880662 | 0.011261733 |
| Gm26671       | 2.454378592 | 0.011575431 |
| Gm42156       | 2.874098594 | 0.011750609 |
| Gm33333       | 1.719111938 | 0.011854747 |
| 4933405L10Rik | 1.725202425 | 0.011882047 |
| Gm32304       | 1.843955473 | 0.01223488  |
| Lppos         | 1.441228397 | 0.012412897 |
| Gm34945       | 1.707023036 | 0.012453022 |
| LOC108168969  | 2.617247997 | 0.012676502 |
| Gm39271       | 1.992087426 | 0.012818321 |
| 2610037D02Rik | 1.642024146 | 0.0132355   |
| Gm10440       | 1.208719217 | 0.013331248 |
| Gm9618        | 3.894215263 | 0.013456789 |
| Loxhd1        | 2.662131026 | 0.013472713 |
| Wfdc3         | 2.001650659 | 0.013548264 |
| Gm36461       | 1.026347738 | 0.013665687 |
| Synpo2l       | 1.40711887  | 0.01373359  |
| Hist1h3h      | 2.110713022 | 0.013798596 |
| Gm36101       | 1.94797879  | 0.014128997 |
| Gm13154       | 2.733053028 | 0.014204691 |

|               |             |             |
|---------------|-------------|-------------|
| Gm40540       | 1.208588766 | 0.014517493 |
| Zbtb42        | 1.191174397 | 0.014602735 |
| 2010001A14Rik | 1.186491821 | 0.01464555  |
| Gm7488        | 1.355483531 | 0.014902471 |
| 5730422E09Rik | 1.697659688 | 0.014943421 |
| Gm42188       | 1.718421035 | 0.015116216 |
| Ifi27l2a      | 1.234008677 | 0.015584397 |
| Gm10282       | 1.11437439  | 0.015639538 |
| Ucp1          | 2.275259065 | 0.015865568 |
| Gm10263       | 1.29114723  | 0.016007662 |
| Gm38862       | 2.715599129 | 0.016105692 |
| Hist1h2ae     | 1.213315535 | 0.016262703 |
| Gm26583       | 1.490417977 | 0.016381007 |
| Sh2d6         | 1.45453764  | 0.016394897 |
| Gm41287       | 1.030973614 | 0.016449119 |
| Gm32398       | 2.186642103 | 0.016546898 |
| Gm31852       | 1.344227156 | 0.016567763 |
| Mafa          | 2.330711108 | 0.016686744 |
| Zfp3611-ps    | 1.542070174 | 0.016823114 |
| Gm38566       | 1.001630648 | 0.017849193 |
| Trp53cor1     | 1.741605726 | 0.018382397 |
| Gm32123       | 1.764297816 | 0.018449758 |
| Gm40010       | 2.043648436 | 0.018667412 |
| Gm2109        | 3.408427771 | 0.018885135 |
| Fam92b        | 2.486819133 | 0.019148016 |
| Gm12506       | 1.834354944 | 0.019271865 |
| Gjc3          | 1.610279808 | 0.019499667 |
| Gm31344       | 1.452830126 | 0.019708453 |
| Fbxo40        | 1.738140637 | 0.020125285 |
| 4930509J09Rik | 1.075529623 | 0.020439084 |
| A230020J21Rik | 2.740663161 | 0.020635436 |
| Aanat         | 1.178588551 | 0.02086494  |
| Gm34505       | 1.245388995 | 0.020886617 |
| LOC108169017  | 1.563100338 | 0.020956505 |
| Gm26748       | 3.027373023 | 0.021296051 |
| Gm34403       | 1.628540317 | 0.021521857 |
| Gstm6         | 1.220357753 | 0.021522695 |
| Marveld3      | 1.184618088 | 0.021721199 |
| Slfn2         | 1.293570532 | 0.022004174 |
| LOC102632465  | 1.442005821 | 0.022085828 |
| Rps15a-ps6    | 3.492981351 | 0.022199809 |
| Kcnn4         | 1.663753669 | 0.022241223 |
| Wfikkn1       | 1.077915057 | 0.022268085 |
| Gm39676       | 1.647686673 | 0.022511628 |
| Gm36905       | 3.275899438 | 0.022582478 |
| Ren1          | 2.542023411 | 0.022919393 |
| Pctp          | 1.168209553 | 0.02317811  |
| Bhlhe23       | 2.786123204 | 0.023330874 |
| LOC108168144  | 1.391732476 | 0.023382569 |
| 6030443J06Rik | 1.186257674 | 0.023486775 |
| Gm35281       | 1.045751761 | 0.023618806 |
| Gm41461       | 1.957115013 | 0.023690957 |
| Gm21284       | 1.603988703 | 0.023690957 |

|               |             |             |
|---------------|-------------|-------------|
| Gm35476       | 1.676545254 | 0.023980469 |
| Gm36311       | 2.171112081 | 0.024533526 |
| Scnn1b        | 1.582967505 | 0.02475453  |
| Gm34128       | 2.693019204 | 0.024755206 |
| Cd59a         | 1.359389577 | 0.025527374 |
| Cd2           | 1.957088781 | 0.025593581 |
| Arr3          | 1.231681572 | 0.025607824 |
| LOC102634584  | 2.020215839 | 0.025793405 |
| Mme11         | 1.398867579 | 0.025934243 |
| Gm40777       | 2.486539233 | 0.026157475 |
| Gm35379       | 1.569033469 | 0.026431509 |
| Slc10a6       | 2.168608182 | 0.027160362 |
| Gm5067        | 1.905819992 | 0.027554388 |
| Hsf4          | 1.10339866  | 0.027643841 |
| Ccl9          | 1.110771435 | 0.027791385 |
| Gm39483       | 1.719211486 | 0.027801756 |
| 9430060I03Rik | 1.524772127 | 0.027839928 |
| 1810044D09Rik | 1.005750676 | 0.027900077 |
| LOC102634887  | 1.552533019 | 0.027908318 |
| LOC105246847  | 2.102047256 | 0.028342053 |
| Gm32970       | 1.040430626 | 0.028355918 |
| LOC108168075  | 1.665360619 | 0.028601394 |
| Gm40588       | 2.342603017 | 0.028926848 |
| Ankmy1        | 1.495009581 | 0.028940229 |
| Hist1h4c      | 2.333370155 | 0.029243149 |
| Gm5898        | 1.180946954 | 0.029309255 |
| Gm31227       | 2.959037178 | 0.029623908 |
| Gm31893       | 2.15272716  | 0.030163416 |
| Prdm12        | 1.11755507  | 0.030527305 |
| Gm26908       | 1.214014401 | 0.030566684 |
| Gm41590       | 2.444969419 | 0.030694374 |
| Aox3          | 1.014873335 | 0.030912479 |
| Krt73         | 1.214286182 | 0.031034137 |
| Gm36904       | 1.056984337 | 0.031056635 |
| Gm33159       | 1.546039628 | 0.031131806 |
| Gm40180       | 1.290882587 | 0.031154291 |
| Acss3         | 1.19859195  | 0.031446572 |
| Gm32057       | 2.041579025 | 0.031519006 |
| 9530053A07Rik | 1.194106014 | 0.032708338 |
| Clec3a        | 1.393441451 | 0.033837901 |
| LOC108168248  | 1.427561102 | 0.034349635 |
| Nkx6-2        | 1.966053714 | 0.0347511   |
| Gm33858       | 2.638574097 | 0.035263411 |
| B3gnt8        | 1.186079555 | 0.035363862 |
| Eppk1         | 1.008642984 | 0.03544827  |
| Ifitm7        | 1.445335262 | 0.035687259 |
| Tlr8          | 1.480536996 | 0.036265933 |
| Otoa          | 1.255832598 | 0.037203935 |
| Cd101         | 1.878895758 | 0.0377088   |
| Ifi44         | 1.400303881 | 0.037764498 |
| Gm13248       | 1.355688798 | 0.037896072 |
| 9430024E24Rik | 1.965240445 | 0.038391674 |
| a             | 1.356104895 | 0.038671597 |

|               |             |             |
|---------------|-------------|-------------|
| Olf1372-ps1   | 1.877290535 | 0.039036851 |
| Galnt6        | 1.062139921 | 0.039321053 |
| Muc2          | 1.096651915 | 0.039593498 |
| Hist1h2bk     | 2.282031611 | 0.039739231 |
| C230072F16Rik | 1.036857641 | 0.039863958 |
| Tex35         | 1.409443657 | 0.040140153 |
| LOC102636024  | 1.276653718 | 0.04065293  |
| Gm37548       | 1.541990384 | 0.040750753 |
| 1700123O21Rik | 2.019607703 | 0.04086739  |
| Mybpc1        | 1.339895663 | 0.041032954 |
| Mb            | 1.749368217 | 0.041303705 |
| Thbs4         | 1.01247249  | 0.041341793 |
| Gm10914       | 1.219250728 | 0.041622127 |
| Ftcd          | 1.761779188 | 0.042053669 |
| Mrap          | 1.976048012 | 0.042132741 |
| Wt1           | 2.376622637 | 0.04227954  |
| Gm34746       | 2.303701574 | 0.042313769 |
| Gm6657        | 1.352548618 | 0.042857932 |
| Gm29917       | 1.883465375 | 0.043221517 |
| Atp2a1        | 1.202286682 | 0.043260117 |
| A630066F11Rik | 1.042803768 | 0.043324558 |
| LOC108168977  | 2.571979977 | 0.044201857 |
| Gm29724       | 2.59235565  | 0.044872734 |
| Cstad         | 1.723976125 | 0.044937162 |
| BB123696      | 2.340062669 | 0.045749073 |
| Gm41033       | 1.756526932 | 0.046534351 |
| 4932443I19Rik | 1.011003683 | 0.046856159 |
| Cfap58        | 1.035328562 | 0.047054589 |
| Cpa1          | 1.60329932  | 0.047577281 |
| Gm34385       | 1.728754331 | 0.047664153 |
| Gm15607       | 1.204714806 | 0.048230626 |
| Slc44a3       | 1.900830952 | 0.048714421 |
| LOC102633627  | 1.439844901 | 0.048801314 |
| Gm31792       | 1.208435836 | 0.048995783 |
| Nrk           | 1.139698566 | 0.049247525 |
| LOC108167592  | 1.028425839 | 0.049722377 |

**Supplementary Table 2. The list of downregulated genes.**

| Gene Name     | log2FoldChange | padj        |
|---------------|----------------|-------------|
| Gm6969        | -6.616245242   | 5.34E-75    |
| Gm9855        | -6.339671236   | 0.000958501 |
| Gm6937        | -6.327546063   | 0.034860447 |
| Hsd3b1        | -6.151914276   | 0.000115796 |
| Hist1h2al     | -5.506205694   | 2.93E-11    |
| LOC108168958  | -5.196270425   | 0.001182268 |
| Avp           | -4.775513245   | 0.029191048 |
| Gm38492       | -4.674798162   | 0.000702174 |
| Gm8730        | -4.382405747   | 0.001686536 |
| Hao2          | -4.35321121    | 0.003314787 |
| Gm41265       | -4.343813201   | 0.002717778 |
| Gm11820       | -4.268765826   | 1.57E-06    |
| Gm14165       | -4.163031537   | 0.004378444 |
| Adamdec1      | -3.937709651   | 0.018110875 |
| Gm3375        | -3.906233412   | 0.002706945 |
| Gm6776        | -3.881566003   | 0.004260728 |
| Gm7827        | -3.739461892   | 4.21E-06    |
| Gm38880       | -3.575451629   | 0.006406176 |
| Pvalb         | -3.528948581   | 0.017753126 |
| Gm8707        | -3.495669529   | 7.45E-06    |
| Gm41363       | -3.209588379   | 0.001123313 |
| LOC108168932  | -3.01182853    | 3.73E-06    |
| Dnajc5b       | -3.005569501   | 0.027047864 |
| LOC108168824  | -2.956260903   | 0.008520317 |
| LOC108168281  | -2.946008658   | 6.11E-17    |
| LOC105244019  | -2.945051423   | 0.020450985 |
| LOC108168499  | -2.935850914   | 0.000372132 |
| 1700080N15Rik | -2.92012315    | 0.026452863 |
| 9530036M11Rik | -2.908932662   | 0.036521906 |
| Cd209f        | -2.871275645   | 0.005153982 |
| Gm41877       | -2.858925838   | 2.23E-08    |
| Gm30116       | -2.857301848   | 0.012596341 |
| Gm15319       | -2.759683048   | 0.034665885 |
| Il1rl1        | -2.739642514   | 0.014775134 |
| LOC108168993  | -2.656611685   | 0.01223488  |
| Gm7707        | -2.640234351   | 0.001747529 |
| Gm40235       | -2.629303159   | 1.22E-06    |
| Gm15104       | -2.614109606   | 0.002357112 |
| Gm12751       | -2.607168336   | 1.03E-05    |
| Gm38650       | -2.588223878   | 0.009058358 |
| Mir1188       | -2.543111352   | 0.002526205 |
| Gm9625        | -2.531225931   | 1.02E-06    |
| LOC108168305  | -2.516953495   | 0.047730811 |
| Gm30658       | -2.489740382   | 0.043282272 |
| Gm10819       | -2.468856367   | 0.005829889 |
| Gm33697       | -2.467719742   | 0.030549034 |
| Gm14637       | -2.453803739   | 0.008014331 |
| Prss52        | -2.450457227   | 0.002377352 |
| Gm27887       | -2.441440311   | 0.00530871  |
| Gm35599       | -2.439215064   | 0.000110847 |
| Hsd3b6        | -2.413412862   | 0.018781979 |

|               |              |             |
|---------------|--------------|-------------|
| Gm36267       | -2.365227281 | 0.020513188 |
| Adgrf4        | -2.359035813 | 0.003605304 |
| Cers3         | -2.349530227 | 0.000480128 |
| Gm41783       | -2.330772853 | 0.004813181 |
| Mir1970       | -2.324991215 | 0.036811371 |
| Gm39314       | -2.299700987 | 0.046005696 |
| Hsd3b3        | -2.282909257 | 0.000262863 |
| LOC102635661  | -2.275641081 | 0.011136933 |
| LOC108167491  | -2.256931648 | 0.018854037 |
| Gm36221       | -2.203512043 | 0.00051761  |
| Gm9726        | -2.177129128 | 0.026180904 |
| Ciita         | -2.169510093 | 1.58E-06    |
| Efcab3        | -2.164010671 | 0.035046874 |
| Gm15753       | -2.147609569 | 3.33E-07    |
| Gm31416       | -2.10999793  | 0.049975175 |
| Wsb1          | -2.063290584 | 8.89E-167   |
| LOC108168814  | -2.055960308 | 0.000533545 |
| Gm31214       | -2.041514406 | 2.74E-11    |
| Gm31326       | -2.028729548 | 4.91E-08    |
| LOC108168384  | -2.003120346 | 0.012717765 |
| Gm14327       | -1.990111955 | 0.009877272 |
| Gm20219       | -1.977157306 | 9.26E-08    |
| Mir1968       | -1.958901844 | 0.026758251 |
| Gm33467       | -1.92653218  | 0.003189905 |
| Lrrc26        | -1.919048632 | 0.000497889 |
| Msx3          | -1.902643825 | 3.89E-05    |
| Gm34676       | -1.897375786 | 0.02052189  |
| Lmx1b         | -1.891176899 | 0.049840498 |
| LOC102637219  | -1.888301038 | 0.049761293 |
| Gm33585       | -1.883037728 | 0.021724716 |
| LOC108167726  | -1.882300414 | 5.04E-05    |
| G430095P16Rik | -1.839480794 | 1.21E-06    |
| LOC107988026  | -1.82299568  | 0.038374004 |
| LOC105243866  | -1.821599235 | 0.00850415  |
| Tgm3          | -1.816449757 | 0.001101058 |
| 9130227L01Rik | -1.815823031 | 0.022785101 |
| Gm1141        | -1.810132674 | 0.016293736 |
| 4933408B17Rik | -1.800592751 | 4.28E-07    |
| Arglu1        | -1.79972163  | 1.14E-138   |
| Tmem210       | -1.796307344 | 0.007615712 |
| LOC108168839  | -1.793212406 | 0.027074296 |
| Esr1          | -1.783377455 | 1.59E-05    |
| Gm3173        | -1.775249066 | 3.22E-06    |
| Mir1249       | -1.766795777 | 8.54E-06    |
| Gm36392       | -1.76557566  | 4.47E-08    |
| LOC102636733  | -1.750768142 | 0.021147474 |
| Trank1        | -1.750626065 | 5.84E-102   |
| Lmo7          | -1.747120944 | 1.37E-84    |
| Nwd2          | -1.745657593 | 9.30E-59    |
| Gm31336       | -1.738669398 | 0.024161825 |
| Srrm4os       | -1.738356929 | 2.77E-16    |
| Gm16035       | -1.734055876 | 0.028166301 |
| Usp43         | -1.720802494 | 4.25E-29    |

|               |              |             |
|---------------|--------------|-------------|
| LOC102640098  | -1.718831621 | 5.35E-05    |
| Gm40996       | -1.716185585 | 5.86E-05    |
| Flt3          | -1.714011079 | 0.034387971 |
| Ccl17         | -1.713739077 | 0.01784315  |
| LOC108168986  | -1.678498993 | 0.022725177 |
| Hbq1b         | -1.673579679 | 4.09E-09    |
| LOC108167915  | -1.671270966 | 0.002662061 |
| Gm32949       | -1.665116617 | 0.000718025 |
| LOC102639013  | -1.663447587 | 0.000401965 |
| 1700093K21Rik | -1.660217738 | 0.000450292 |
| Gm41595       | -1.656280466 | 2.04E-05    |
| Prkcg         | -1.650991622 | 3.10E-53    |
| Atp11b        | -1.645428129 | 2.07E-77    |
| Sfswap        | -1.628754342 | 5.81E-100   |
| Gm39786       | -1.622504871 | 0.033824374 |
| Mctp1         | -1.596815861 | 3.28E-49    |
| Satb2         | -1.596437615 | 1.42E-10    |
| LOC108168936  | -1.591228699 | 7.56E-15    |
| Tcf24         | -1.575403965 | 0.009039334 |
| Gm40393       | -1.575388802 | 0.007239136 |
| LOC101055992  | -1.572990034 | 0.039263073 |
| Ptprk         | -1.565966731 | 1.69E-52    |
| LOC108167431  | -1.562644231 | 5.07E-13    |
| Smyd1         | -1.560614538 | 0.002061518 |
| Gm42111       | -1.560328467 | 0.007338662 |
| 5730409K12Rik | -1.559475926 | 0.034983029 |
| Tbrg3         | -1.544663491 | 0.03693625  |
| Gm34180       | -1.538912107 | 0.040348551 |
| LOC108168740  | -1.532488911 | 0.004716601 |
| 5930438M14Rik | -1.532446179 | 3.18E-07    |
| Adgrf2        | -1.529030505 | 0.03089954  |
| LOC108169120  | -1.528174023 | 0.018248857 |
| Gm32005       | -1.525496029 | 0.029243296 |
| Slc26a4       | -1.5185499   | 0.03161037  |
| Slc47a1       | -1.515821662 | 0.008420174 |
| Gm15423       | -1.515111477 | 0.003781694 |
| Gm12426       | -1.514255997 | 8.76E-13    |
| Gm32849       | -1.513644631 | 0.013973306 |
| Cldn20        | -1.509592915 | 0.003186649 |
| Mgam          | -1.505626163 | 0.032064334 |
| Ccno          | -1.503712617 | 0.017462544 |
| Nr4a3         | -1.499100415 | 1.82E-36    |
| Enkur         | -1.495508685 | 4.56E-05    |
| Met           | -1.495203204 | 8.48E-41    |
| Gm39704       | -1.488267168 | 0.049761293 |
| Robo3         | -1.48816731  | 2.79E-06    |
| LOC108168877  | -1.486378656 | 0.003949568 |
| Dnah12        | -1.482458014 | 0.001407301 |
| Grm8          | -1.480530741 | 3.14E-09    |
| Gm33747       | -1.479888535 | 0.008478526 |
| Cfap69        | -1.475870152 | 1.91E-24    |
| Slc6a4        | -1.471720906 | 0.000228909 |
| Gm34576       | -1.462238155 | 0.005433221 |



|               |              |             |
|---------------|--------------|-------------|
| Cacna1g       | -1.455721887 | 9.30E-59    |
| LOC108167681  | -1.452750412 | 0.004744573 |
| LOC102635997  | -1.450704745 | 0.022558655 |
| Gm31090       | -1.45067351  | 0.0214024   |
| Gm15186       | -1.449418035 | 0.045463477 |
| Gm3164        | -1.448836674 | 0.033114815 |
| Mir344-2      | -1.447505866 | 0.020220129 |
| Nlrp5-ps      | -1.445487107 | 1.59E-05    |
| Tmem255b      | -1.445248534 | 0.01457545  |
| Tdrd6         | -1.4391966   | 0.000163732 |
| Crlf1         | -1.438085037 | 2.25E-29    |
| Micalcl       | -1.43076701  | 1.21E-06    |
| Gm4876        | -1.426875217 | 0.027644978 |
| 1700020D05Rik | -1.421878343 | 0.000575167 |
| LOC102634333  | -1.412170822 | 0.000124936 |
| Atp8a1        | -1.410867207 | 2.55E-77    |
| A830009L08Rik | -1.40368434  | 0.002768766 |
| Ptgfr         | -1.398054787 | 0.003855945 |
| Rasgrf2       | -1.378245205 | 6.37E-45    |
| LOC108168306  | -1.378068144 | 1.76E-08    |
| Prrt1         | -1.373240603 | 5.58E-30    |
| Cpeb1         | -1.36950809  | 2.27E-09    |
| Col15a1       | -1.358146154 | 8.09E-19    |
| Gm32528       | -1.3575256   | 7.76E-10    |
| Gm3002        | -1.357385087 | 4.80E-07    |
| Slc9b2        | -1.356288902 | 6.08E-06    |
| Gm5069        | -1.355879407 | 0.005098306 |
| Sptlc2        | -1.354509859 | 6.97E-62    |
| Gm8773        | -1.352069227 | 1.13E-06    |
| LOC108168282  | -1.344468909 | 0.010927114 |
| Gm28154       | -1.344308121 | 0.025046828 |
| Cdc20b        | -1.339148323 | 0.003723058 |
| Ptk2b         | -1.337242546 | 1.00E-25    |
| 2810442N19Rik | -1.333411107 | 0.030778255 |
| Pfkip         | -1.332974218 | 3.30E-94    |
| Mcidas        | -1.322216678 | 0.029637849 |
| Rasl10a       | -1.319239497 | 0.000919967 |
| Gm28175       | -1.316306419 | 1.04E-33    |
| Nfix          | -1.313964892 | 7.12E-11    |
| Gm30810       | -1.313742061 | 5.75E-05    |
| Mkx           | -1.311268106 | 9.95E-09    |
| LOC108169128  | -1.309218331 | 0.005135473 |
| Arhgap6       | -1.302004641 | 1.99E-06    |
| Dok5          | -1.300816321 | 5.81E-48    |
| Kcnk4         | -1.296637986 | 0.000451324 |
| Prok1         | -1.296429814 | 0.048774044 |
| G530011O06Rik | -1.2956272   | 0.000971707 |
| Tbc1d5        | -1.285826312 | 4.47E-32    |
| Gm33320       | -1.27943539  | 0.045856357 |
| A3galt2       | -1.276636993 | 0.000187268 |
| Tmem30c       | -1.275222745 | 0.045072062 |
| Ccl28         | -1.268882415 | 0.000235132 |
| Gm39014       | -1.266610193 | 0.03195191  |

|               |              |             |
|---------------|--------------|-------------|
| Tshr          | -1.259313397 | 5.51E-06    |
| Crhr1         | -1.258112928 | 1.37E-19    |
| Ptprd         | -1.252726715 | 4.24E-52    |
| Gm32643       | -1.243906342 | 2.53E-05    |
| 4930426D05Rik | -1.24380599  | 0.041450337 |
| Gm10419       | -1.243356637 | 4.40E-15    |
| Clk1          | -1.238985261 | 7.59E-46    |
| Colgalt1      | -1.236630226 | 3.49E-50    |
| Gm41688       | -1.234908036 | 0.009240474 |
| 1700109K24Rik | -1.234232989 | 3.37E-09    |
| Npas2         | -1.230586566 | 1.05E-12    |
| Dcdc2b        | -1.227427354 | 0.000279396 |
| Zscan26       | -1.223323872 | 1.52E-27    |
| Gpc5          | -1.218675457 | 7.77E-07    |
| Gm13199       | -1.218432939 | 0.002715758 |
| Alpk1         | -1.21764299  | 0.002800191 |
| Gm32133       | -1.216622489 | 0.004484231 |
| LOC108167356  | -1.2156062   | 0.005957374 |
| Gm2164        | -1.212558394 | 2.00E-19    |
| Grm7          | -1.2081124   | 5.27E-26    |
| LOC108168881  | -1.206591921 | 0.003109857 |
| Opcml         | -1.204638927 | 7.63E-50    |
| Grm2          | -1.202767994 | 1.59E-15    |
| Gls           | -1.201917797 | 1.87E-78    |
| Tnfsf10       | -1.199083181 | 0.020709377 |
| Fank1         | -1.197719049 | 5.42E-05    |
| Cpne9         | -1.189217613 | 0.002976692 |
| Nav1          | -1.188628979 | 3.55E-35    |
| Gm33877       | -1.187939499 | 0.002061262 |
| Npas4         | -1.18682717  | 8.74E-15    |
| Mvd           | -1.18460619  | 1.14E-36    |
| Spx           | -1.184597971 | 5.47E-05    |
| LOC108169162  | -1.181617443 | 0.006741312 |
| Mas1          | -1.181091846 | 0.029286926 |
| Rxfp1         | -1.180745817 | 1.82E-12    |
| Nmrk1         | -1.172529075 | 0.005148124 |
| Gm10277       | -1.168688657 | 0.00230841  |
| A930013F10Rik | -1.16784925  | 3.25E-18    |
| Rgs1          | -1.165754699 | 0.005433221 |
| Doc2a         | -1.164915836 | 1.09E-18    |
| Guf1          | -1.164809082 | 1.18E-33    |
| Nnmt          | -1.162111996 | 0.0019424   |
| Myo19         | -1.160292639 | 6.69E-14    |
| Adamts3       | -1.156766066 | 9.47E-30    |
| Gipr          | -1.156753581 | 9.25E-20    |
| Ephb6         | -1.156305181 | 7.85E-26    |
| Fancg         | -1.146258509 | 1.36E-15    |
| Gm27197       | -1.144658101 | 7.22E-07    |
| Pcdhgb1       | -1.140104352 | 1.70E-05    |
| A930017M01Rik | -1.139329629 | 5.29E-09    |
| LOC108167761  | -1.138795679 | 0.014201775 |
| Gm42344       | -1.135482422 | 0.030141471 |
| Styk1         | -1.134364896 | 9.78E-07    |

|               |              |             |
|---------------|--------------|-------------|
| Fam65c        | -1.133078295 | 0.031055319 |
| 2310067E19Rik | -1.127396687 | 0.0174956   |
| Gm42158       | -1.125244348 | 0.003245815 |
| Ccdc116       | -1.124434707 | 1.26E-09    |
| Prss12        | -1.123376418 | 1.51E-13    |
| Gm2808        | -1.122358651 | 0.007327088 |
| Far1os        | -1.121928441 | 5.21E-05    |
| Sorcs1        | -1.120086502 | 2.91E-27    |
| ltsn1         | -1.117848885 | 1.35E-55    |
| Gm7890        | -1.117546549 | 0.02885267  |
| Adamts16      | -1.115685268 | 5.43E-05    |
| Bend6         | -1.114205606 | 1.71E-40    |
| Gm15764       | -1.109487067 | 0.027155889 |
| Necab1        | -1.109091068 | 4.38E-37    |
| Prkag2        | -1.108958133 | 1.77E-42    |
| Gm5093        | -1.108861835 | 8.55E-09    |
| Ccbe1         | -1.105474132 | 0.011984992 |
| Slc26a7       | -1.101485893 | 2.14E-12    |
| D130043K22Rik | -1.101471844 | 3.24E-15    |
| Galr2         | -1.09699873  | 0.007124114 |
| LOC105244195  | -1.095862336 | 0.032978676 |
| Gm30248       | -1.092751929 | 5.40E-08    |
| Matk          | -1.087236406 | 1.03E-19    |
| Cdk18         | -1.087006291 | 0.017349306 |
| Kpna2-ps      | -1.08459016  | 4.15E-06    |
| Gm36117       | -1.083879456 | 4.41E-05    |
| Fbln7         | -1.082740749 | 0.008774813 |
| LOC101055754  | -1.081509935 | 0.000151414 |
| Grp           | -1.079627227 | 1.93E-10    |
| Rbm5          | -1.079376971 | 9.04E-64    |
| LOC108167879  | -1.079158469 | 0.047545022 |
| Npff          | -1.076869201 | 0.014273921 |
| Ntf3          | -1.076540463 | 5.49E-08    |
| Synj1         | -1.0747006   | 6.60E-58    |
| Zbtb40        | -1.071013299 | 5.44E-10    |
| Gm26868       | -1.068428874 | 0.000101256 |
| Cdkl2         | -1.066836406 | 6.60E-26    |
| Map1a         | -1.066100512 | 1.07E-31    |
| Sema7a        | -1.063324783 | 1.54E-34    |
| Tlr12         | -1.061471231 | 0.04327787  |
| 4930467E23Rik | -1.051798743 | 9.76E-05    |
| Cacna1d       | -1.051797281 | 5.10E-31    |
| Osbpl1a       | -1.050252607 | 2.79E-39    |
| Gm31443       | -1.049752588 | 0.025384136 |
| Pth1r         | -1.048302436 | 2.83E-09    |
| Tec           | -1.048041168 | 6.87E-06    |
| Lrrc45        | -1.047024784 | 3.00E-19    |
| Myo16         | -1.04594077  | 2.62E-36    |
| Ak6           | -1.044290712 | 6.20E-11    |
| Gabrb1        | -1.042977454 | 2.15E-26    |
| Nvl           | -1.040860597 | 6.79E-50    |
| Pou3f1        | -1.040714499 | 1.46E-18    |
| Apln          | -1.037987936 | 8.41E-05    |

|               |              |             |
|---------------|--------------|-------------|
| Chrna3        | -1.035888046 | 0.000173187 |
| Dmtn          | -1.035786091 | 6.68E-26    |
| 4931403G20Rik | -1.035766916 | 0.034538715 |
| Myo9b         | -1.035222904 | 5.98E-30    |
| 3300002P13Rik | -1.035040918 | 0.000120451 |
| Egr4          | -1.032156055 | 0.042426272 |
| Hook1         | -1.029455379 | 1.59E-36    |
| Zbed6         | -1.024957119 | 7.51E-20    |
| Ackr1         | -1.024949838 | 2.07E-21    |
| Ddn           | -1.023809657 | 1.85E-22    |
| Adamts20      | -1.023726542 | 1.67E-18    |
| Gm31305       | -1.02347323  | 0.000172956 |
| Ccdc67        | -1.02141495  | 0.010987339 |
| Sfpq          | -1.019677984 | 1.87E-39    |
| Lrp1b         | -1.019473683 | 2.76E-19    |
| Ntsr1         | -1.016979856 | 7.34E-13    |
| Camkv         | -1.015417814 | 4.04E-36    |
| Grin2b        | -1.015301948 | 8.63E-17    |
| Aim2          | -1.010131578 | 3.75E-08    |
| Rimklb        | -1.008353775 | 1.12E-60    |
| Chka          | -1.006788229 | 7.40E-34    |
| Rxfp3         | -1.006333898 | 0.000218047 |
| Gm32080       | -1.006282715 | 0.00104235  |
| Pum3          | -1.004593124 | 1.16E-33    |

Supplementary Table 3. The list of alternatively spliced events.

| Events | chr   | geneSymbol | strand | pos                                                                | InclFormLen | SkipFormLen | WT     | InclLe | Treated | In InLevelDil | ABS(InclLe  | PValue   | FDR |
|--------|-------|------------|--------|--------------------------------------------------------------------|-------------|-------------|--------|--------|---------|---------------|-------------|----------|-----|
| SE     | chr6  | Hnmpa2b1   | -      | 51460434-51461433-51461920-51462055-51463411-51463493              | 284         | 149         | 0.8527 | 0.1523 | 0.7     | 0.7           | 0           | 0        | 0   |
| SE     | chr7  | Plekha1    | +      | 130908336-130908425-130909588-130909658-130910832-130913308        | 219         | 149         | 0.8193 | 0.1263 | 0.693   | 0.693         | 0           | 0        | 0   |
| SE     | chr7  | Plekha1    | +      | 130908336-130908425-130909588-130909735-130910832-130913308        | 296         | 149         | 0.816  | 0.1723 | 0.644   | 0.644         | 0           | 0        | 0   |
| SE     | chr11 | Wsb1       | -      | 79241984-79242156-79242499-79243575-79244463-79245653              | 298         | 149         | 0.7853 | 0.148  | 0.637   | 0.637         | 0           | 0        | 0   |
| SE     | chr5  | Mag2       | +      | 20651055-20651193-20661242-20661352-20702070-20702152              | 259         | 149         | 0.8227 | 0.196  | 0.627   | 0.627         | 0           | 0        | 0   |
| SE     | chr9  | Zfp317     | +      | 19643609-19643704-19645212-19645307-19646702-19649743              | 244         | 149         | 1      | 0.3867 | 0.613   | 0.613         | 0           | 0        | 0   |
| SE     | chr7  | Folr1      | -      | 101863925-101864094-101868398-101868554-101869157-101869304        | 298         | 149         | 0.9137 | 0.3093 | 0.604   | 0.604         | 0           | 0        | 0   |
| RI     | chr5  | Sfswap     | +      | 129501233-129501596-129501233-129504105-129503983-129504105        | 298         | 149         | 0.6617 | 0.0593 | 0.602   | 0.602         | 0           | 0        | 0   |
| SE     | chr7  | Folr1      | -      | 101863925-101864094-101868398-101868551-101869157-101869304        | 298         | 149         | 0.9267 | 0.3377 | 0.589   | 0.589         | 0           | 0        | 0   |
| RI     | chr15 | Pripf40b   | -      | 99304425-99304490-99304425-99305433-99305408-99305433              | 298         | 149         | 0.7267 | 0.1403 | 0.586   | 0.586         | 0           | 0        | 0   |
| SE     | chr2  | Ahrgap21   | -      | 20879961-20881851-20883200-20883229-20887120-20887160              | 178         | 149         | 0.7623 | 0.181  | 0.581   | 0.581         | 0           | 0        | 0   |
| SE     | chr6  | Tmem209    | -      | 30505733-30505974-30506786-30506917-30508454-30508512              | 280         | 149         | 0.9043 | 0.3293 | 0.575   | 0.575         | 0           | 0        | 0   |
| A5SS   | chr5  | Sfswap     | +      | 129501233-129501596-129501233-129503593-129503983-129504105        | 298         | 149         | 0.616  | 0.042  | 0.574   | 0.574         | 0           | 0        | 0   |
| SE     | chr11 | Tnrc6c     | +      | 117739867-117740009-117741645-117741818-117742927-117743064        | 298         | 149         | 0.8857 | 0.3173 | 0.568   | 0.568         | 0           | 0        | 0   |
| SE     | chr1  | Mdm4       | -      | 133003791-133003890-133004654-133004692-133009137-133009192        | 187         | 149         | 0.7373 | 0.177  | 0.566   | 0.566         | 2.26485E-14 | 3.01E-12 | 0   |
| SE     | chr15 | Lv6h       | -      | 75566132-75566259-75566714-75566831-75567095-75567123              | 266         | 149         | 0.8547 | 0.2987 | 0.556   | 0.556         | 0           | 0        | 0   |
| SE     | chr2  | Rtel1      | +      | 181349669-181349709-181349895-181349980-181350126-181350203        | 234         | 149         | 0.964  | 0.4177 | 0.546   | 0.546         | 0           | 0        | 0   |
| SE     | chr3  | Rsrc1      | +      | 67349909-67350015-67355474-67355626-67356221-67358398              | 298         | 149         | 0.8957 | 0.3507 | 0.545   | 0.545         | 0           | 0        | 0   |
| SE     | chr7  | Folr1      | -      | 101863925-101864094-101868398-101868470-101869157-101869304        | 221         | 149         | 0.9173 | 0.3723 | 0.545   | 0.545         | 0           | 0        | 0   |
| SE     | chrX  | Atp2b3     | +      | 73555053-73555252-735559864-73559950-73570234-73573275             | 235         | 149         | 0.18   | 0.7243 | -0.544  | 0.544         | 6.19504E-14 | 7.8E-12  | 0   |
| SE     | chr6  | Luc7l2     | +      | 38551334-38551908-38554980-38556635-38568847-38568917              | 232         | 149         | 0.3707 | 0.912  | -0.541  | 0.541         | 0           | 0        | 0   |
| SE     | chr6  | Wnk1       | -      | 119952685-119952969-119953711-119953902-119956071-119956196        | 280         | 149         | 0.7317 | 0.1967 | 0.535   | 0.535         | 1.11022E-16 | 1.97E-14 | 0   |
| SE     | chrX  | Atp2b3     | +      | 73555053-73555252-73559864-73560017-73570234-73573275              | 298         | 149         | 0.2307 | 0.7527 | -0.527  | 0.527         | 7.21645E-15 | 1.06E-12 | 0   |
| SE     | chr3  | Col1a1     | +      | 114133136-114133189-114138171-114138186-114138400-114138453        | 164         | 149         | 0.823  | 0.2957 | 0.526   | 0.526         | 1.6932E-12  | 1.7E-10  | 0   |
| SE     | chr7  | Plekha1    | +      | 130908336-130908425-130909588-130909628-130910832-130913308        | 189         | 149         | 0.902  | 0.376  | 0.527   | 0.527         | 0           | 0        | 0   |
| SE     | chr6  | Wnk1       | -      | 119952685-119952969-119953711-119954232-119956071-119956193        | 298         | 149         | 0.834  | 0.311  | 0.523   | 0.523         | 0           | 0        | 0   |
| SE     | chr9  | Zfp426     | -      | 20473028-20473108-20474907-20475052-20476396-20476478              | 294         | 149         | 0.932  | 0.4117 | 0.52    | 0.52          | 1.36557E-14 | 1.89E-12 | 0   |
| SE     | chr10 | Fam229b    | -      | 39118804-39119034-39120258-39120396-39122177-39122332              | 287         | 149         | 0.917  | 0.3977 | 0.519   | 0.519         | 0           | 0        | 0   |
| SE     | chr15 | Kif21a     | -      | 90972625-90972715-90976471-90976509-90980795-90980998              | 187         | 149         | 0.7123 | 0.1943 | 0.518   | 0.518         | 0           | 0        | 0   |
| SE     | chr11 | Tnrc6c     | +      | 117739867-117740009-117741669-117741818-117742927-117743064        | 298         | 149         | 0.9103 | 0.3983 | 0.512   | 0.512         | 0           | 0        | 0   |
| SE     | chr9  | Zfp426     | -      | 20473028-20473108-20474907-20475052-20476396-20476478              | 298         | 149         | 0.9327 | 0.423  | 0.51    | 0.51          | 6.83897E-14 | 8.56E-12 | 0   |
| SE     | chr7  | Pip5k      | +      | 47030421-47030504-47030727-47030834-47031377-47031570              | 298         | 149         | 0.9923 | 0.907  | 0.502   | 0.502         | 0           | 0        | 0   |
| SE     | chr4  | Sqj1       | +      | 102860770-102860794-10286366-10286373-102867640-102867696          | 217         | 149         | 0.7323 | 0.2327 | 0.5     | 0.5           | 0           | 0        | 0   |
| SE     | chr9  | Zfp317     | +      | 19643609-19643704-19645225-19645307-19646702-19649743              | 231         | 149         | 1      | 0.5    | 0.5     | 0.5           | 0           | 0        | 0   |
| A5SS   | chr5  | Guf1       | +      | 69567128-69567261-69567128-69567490-69568396-69568497              | 298         | 149         | 0.7203 | 0.2217 | 0.499   | 0.499         | 0           | 0        | 0   |
| SE     | chr1  | Adam23     | +      | 63572887-63572998-63581137-63581227-63592808-63596104              | 239         | 149         | 0.6397 | 0.1417 | 0.498   | 0.498         | 2.22142E-11 | 1.79E-09 | 0   |
| SE     | chr5  | Apb2       | -      | 66391172-66391857-66392273-66392335-66400078-66400281              | 211         | 149         | 0.7937 | 0.2977 | 0.496   | 0.496         | 4.75175E-14 | 6.04E-12 | 0   |
| RI     | chr1  | Hnmpu      | -      | 178338230-178337313-17833620-178325313-178325313-178325313         | 298         | 149         | 0.8887 | 0.395  | 0.494   | 0.494         | 0           | 0        | 0   |
| RI     | chr4  | Cnrl2      | +      | 155818539-155819000-155818539-155820428-155819706-155820428        | 298         | 149         | 0.8973 | 0.4047 | 0.493   | 0.493         | 0           | 0        | 0   |
| MXE    | chr8  | Agrl1      | -      | 8666297-8667416-86681384-86681677-8668373-8668977-8690106          | 298         | 232         | 0.489  | 0.7    | 0.489   | 0.489         | 0           | 0        | 0   |
| SE     | chr12 | Nrcam      | +      | 44576604-44576789-44578145-44578180-44590108-44592039              | 184         | 149         | 0.9103 | 0.422  | 0.488   | 0.488         | 0           | 0        | 0   |
| SE     | chr4  | Sqj1       | +      | 102860770-102860794-10286366-10286373-102867640-102867696          | 220         | 149         | 0.8457 | 0.3573 | 0.488   | 0.488         | 0           | 0        | 0   |
| SE     | chr3  | Pogz       | +      | 94862422-94862530-94864088-94864378-94864485-94864667              | 298         | 149         | 0.9473 | 0.461  | 0.486   | 0.486         | 0           | 0        | 0   |
| SE     | chr2  | Prr2b      | +      | 32226945-32227036-32229263-32229344-32230611-32234537              | 230         | 149         | 0.8307 | 0.3457 | 0.485   | 0.485         | 0           | 0        | 0   |
| SE     | chr5  | Mag2       | +      | 20651055-20651193-20661264-20661352-20702070-20702218              | 237         | 149         | 0.9127 | 0.431  | 0.482   | 0.482         | 0           | 0        | 0   |
| MXE    | chr5  | Rnf32      | +      | 29198574-29198838-29206696-29206804-29224117-29224284-29225043-292 | 257         | 298         | 0.1352 | 0.615  | -0.48   | 0.48          | 7.11198E-12 | 1.23E-09 | 0   |
| MXE    | chr10 | Fam229b    | -      | 39118804-39119034-39120258-39120396-39122177-39122332-39132247-391 | 298         | 287         | 0.2387 | 0.718  | -0.479  | 0.479         | 5.21805E-15 | 1.5E-12  | 0   |
| SE     | chr15 | Prr5       | +      | 84663171-84663261-84661200-84661319-84668793-84667983              | 268         | 149         | 0.857  | 0.3963 | 0.477   | 0.477         | 5.06151E-13 | 5.45E-11 | 0   |
| SE     | chr14 | Zdhc20     | +      | 57849621-57847062-57850145-57850180-57856610-57856730              | 184         | 149         | 0.747  | 0.271  | 0.476   | 0.476         | 0           | 0        | 0   |
| A3SS   | chr13 | Pkpk       | -      | 6597859-6598011-6598489-6596062-6598489-6598653                    | 298         | 149         | 0.9093 | 0.434  | 0.475   | 0.475         | 0           | 0        | 0   |
| SE     | chr2  | Fam171a1   | +      | 3220253-3220369-3223470-3223584-3224818-3227806                    | 263         | 149         | 0.738  | 0.2637 | 0.474   | 0.474         | 0           | 0        | 0   |
| RI     | chr4  | Srm1       | -      | 13534499-135344669-13534499-13534645-13534631-135346445            | 298         | 149         | 0.93   | 0.462  | 0.468   | 0.468         | 0           | 0        | 0   |
| SE     | chr3  | Zfp697     | +      | 98382454-98382578-98410491-98411487-98425223-98425500              | 298         | 149         | 0.1383 | 0.6047 | -0.466  | 0.466         | 4.79645E-06 | 0.0012   | 0   |
| SE     | chrX  | Kdm6a      | +      | 18246197-18246416-18247567-18247722-18248270-18248359              | 298         | 149         | 0.87   | 0.4057 | 0.464   | 0.464         | 9.3604E-09  | 4.62E-07 | 0   |
| SE     | chr14 | Lmo7       | +      | 101911999-101912160-101913159-101913346-101914277-101914337        | 298         | 149         | 1      | 0.5383 | 0.462   | 0.462         | 0           | 0        | 0   |
| SE     | chr1  | Lrrfp1     | +      | 91107298-91107390-91108580-91108672-91112156-91112297              | 241         | 149         | 0.7987 | 0.3388 | 0.461   | 0.461         | 9.28913E-12 | 8.04E-10 | 0   |
| SE     | chr6  | Hnmpa2b1   | -      | 51460930-51461433-51461983-51462055-51463411-51463493              | 221         | 149         | 0.5853 | 0.126  | 0.46    | 0.46          | 0           | 0        | 0   |
| SE     | chr2  | Pfktb3     | +      | 11471430-11474543-11475754-11475806-11478036-11478058              | 201         | 149         | 0.6547 | 0.195  | 0.459   | 0.459         | 1.33008E-09 | 7.78E-08 | 0   |
| SE     | chr12 | Nrcam      | +      | 44576604-44576780-44578145-44578180-44590108-44592039              | 184         | 149         | 0.849  | 0.3937 | 0.455   | 0.455         | 0           | 0        | 0   |
| SE     | chr1  | Pam        | -      | 97821091-97821988-97822936-97822992-97825837-97826037              | 205         | 149         | 0.9623 | 0.509  | 0.453   | 0.453         | 0           | 0        | 0   |
| SE     | chr4  | Unc13b     | +      | 43232530-43232608-43233904-43233909-43234666-43234740              | 154         | 149         | 0.7437 | 0.2903 | 0.453   | 0.453         | 1.12127E-08 | 5.43E-07 | 0   |
| MXE    | chr17 | Nrxn1      | -      | 90162114-90162433-90163792-90163881-90208323-90208494-90560741-905 | 298         | 238         | 0.749  | 0.297  | 0.452   | 0.452         | 0           | 0        | 0   |
| SE     | chr8  | Rbm34      | -      | 126959542-126959585-126961912-126961971-126965382-126965622        | 208         | 149         | 0.6437 | 0.1913 | 0.452   | 0.452         | 1.15049E-10 | 8.12E-09 | 0   |
| MXE    | chr8  | Lrrc7      | -      | 158163892-158164072-15817056-15817056-158175103-158175351-158177   | 298         | 298         | 0.7597 | 0.309  | 0.451   | 0.451         | 1.93554E-10 | 3.42E-08 | 0   |
| MXE    | chr9  | Scamp5     | +      | 57446072-57446173-57451356-57451484-57451980-57452034-57467760-574 | 203         | 277         | 0.7883 | 0.337  | 0.451   | 0.451         | 8.63623E-10 | 8.78E-08 | 0   |
| SE     | chr18 | Atp9b      | -      | 80734141-80736149-80736812-80736844-80736853-80738856              | 183         | 149         | 0.772  | 0.3217 | 0.45    | 0.45          | 0           | 0        | 0   |
| RI     | chr3  | Fubp1      | +      | 152231877-152232022-152231877-152234570-152234570-152234570        | 298         | 149         | 0.9933 | 0.5443 | 0.449   | 0.449         | 0           | 0        | 0   |
| SE     | chr3  | Zfp697     | +      | 98382454-98382578-98410491-98411302-98425223-98425500              | 298         | 149         | 0.1413 | 0.5873 | -0.446  | 0.446         | 1.67547E-05 | 0.000358 | 0   |
| A5SS   | chr9  | Fam214a    | +      | 75018997-75019155-75018997-75023746-75025851-75025847              | 298         | 149         | 1      | 0.5553 | 0.445   | 0.445         | 4.44089E-16 | 1.44E-13 | 0   |
| SE     | chr4  | Pik3cd     | -      | 149654816-149654959-149655127-149655257-149655336-149655500        | 279         | 149         | 0.9507 | 0.5077 | 0.443   | 0.443         | 3.32512E-13 | 3.73E-11 | 0   |
| SE     | chrX  | Grasp1     | +      | 135742692-135742978-135743442-135743522-135744499-135744575        | 22          |             |        |        |         |               |             |          |     |

|      |       |         |   |                                                                     |     |     |        |        |        |       |             |          |
|------|-------|---------|---|---------------------------------------------------------------------|-----|-----|--------|--------|--------|-------|-------------|----------|
| SE   | chr1  | Lrrfp1  | + | 91107298-91107390-91108580-91108672-91110355-91110447               | 241 | 149 | 0.6663 | 0.2707 | 0.396  | 0.396 | 2.4325E-13  | 2.79E-11 |
| SE   | chr9  | Zfp558  | - | 18468614-18468702-18469279-18469396-18472886-18472994               | 236 | 149 | 0.8007 | 0.4057 | 0.395  | 0.395 | 0           | 0        |
| SE   | chr9  | Dixd1c  | - | 50682033-50682200-50682537-50682626-50683725-50683796               | 268 | 149 | 0.8363 | 0.4417 | 0.395  | 0.395 | 1.82487E-08 | 8.31E-07 |
| SE   | chr4  | Ccnl2   | + | 155817921-155817987-155818539-155818552-1558002329-155820417        | 162 | 149 | 0.3243 | 0.1797 | -0.395 | 0.395 | 1.1764E-11  | 9.98E-10 |
| SE   | chr4  | Mpdz    | - | 81356330-81356497-81358266-81358742-81360042-81360213               | 265 | 149 | 0.771  | 0.373  | 0.394  | 0.394 | 4.17472E-08 | 1.75E-06 |
| SE   | chr11 | Bpff    | - | 107043633-107043825-107044492-107044665-107047000-107047343         | 298 | 149 | 0.8603 | 0.4673 | 0.393  | 0.393 | 0           | 0        |
| SE   | chr7  | Fuz     | + | 44897520-44897624-44898503-44898700-44898776-44898871               | 298 | 149 | 0.94   | 0.5477 | 0.392  | 0.392 | 6.66134E-16 | 1.08E-13 |
| SE   | chr10 | Ahi1    | + | 21058153-21058250-21070288-21070543-21072543-21072601               | 298 | 149 | 0.5353 | 0.1447 | 0.391  | 0.391 | 0           | 0        |
| SE   | chr13 | Tbce    | - | 14005143-14005283-14005788-14005852-14005943-14006007               | 213 | 149 | 0.9873 | 0.5977 | 0.39   | 0.39  | 0           | 0        |
| A5SS | chr9  | Trank1  | + | 111373408-111373545-111373408-111374925-111377778-111377781         | 298 | 149 | 0.919  | 0.57   | 0.389  | 0.389 | 4.65183E-14 | 9.84E-12 |
| MXE  | chr12 | Meg3    | + | 109544027-109544742-109544948-109545041-109549291-109549371-1095494 | 242 | 229 | 0.3153 | 0.0437 | -0.389 | 0.389 | 0           | 0        |
| SE   | chr11 | Cobl    | - | 12266856-12267144-12306958-12307128-12309614-12309752               | 298 | 149 | 0.809  | 0.42   | 0.389  | 0.389 | 2.31411E-06 | 6.35E-05 |
| SE   | chr15 | Mapk15  | + | 75998059-75998263-75998371-75998474-75998550-75998678               | 252 | 149 | 1      | 0.6107 | 0.389  | 0.389 | 0.05311E-13 | 3.43E-11 |
| SE   | chr7  | En2     | - | 119786739-119786827-119787404-119787485-119787734-119787834         | 230 | 149 | 0.9887 | 0.6007 | 0.388  | 0.388 | 1.02414E-14 | 1.45E-12 |
| SE   | chr4  | Ptprd   | - | 76138556-76138573-76139294-76139302-76140514-76140772               | 157 | 149 | 0.6797 | 0.2913 | 0.388  | 0.388 | 2.87548E-14 | 3.78E-12 |
| SE   | chr16 | Alg3    | - | 20607764-20607884-20608486-20608646-20608742-20608889               | 298 | 149 | 0.9033 | 0.515  | 0.388  | 0.388 | 2.78064E-10 | 1.84E-08 |
| SE   | chr13 | Slf1    | - | 77091185-77091343-77092398-77092411-77100922-77101056               | 202 | 149 | 0.988  | 0.601  | 0.387  | 0.387 | 1.45439E-14 | 2E-12    |
| MXE  | chr5  | Zfp44   | - | 106619540-106619642-106635610-106638635-106690730-106690877-106692  | 296 | 298 | 0.0797 | 0.4653 | -0.386 | 0.386 | 2.96167E-10 | 3.42E-08 |
| SE   | chr10 | Jmid1c  | + | 67215270-67215375-67216983-67217107-67218038-67218181               | 273 | 149 | 0.801  | 0.4163 | 0.385  | 0.385 | 1.6997E-09  | 9.73E-08 |
| SE   | chr19 | Rbm4d   | + | 4760013-4762647-4764350-4764571-4765263-4765944                     | 298 | 149 | 0.9157 | 0.532  | 0.384  | 0.384 | 6.81725E-07 | 2.18E-05 |
| A5SS | chr8  | Whsc11f | + | 25706824-25706867-25706824-25706864-25709063-25709204               | 181 | 149 | 0.749  | 0.3663 | 0.383  | 0.383 | 4.17174E-09 | 3.27E-07 |
| SE   | chr9  | Rbm5    | + | 107749708-107749799-107750008-107750092-107750463-107750548         | 233 | 149 | 0.909  | 0.5273 | 0.382  | 0.382 | 0           | 0        |
| SE   | chr11 | Usp34   | + | 23361587-23361716-23362577-23362612-23363058-23363198               | 184 | 149 | 0.5153 | 0.134  | 0.381  | 0.381 | 3.33067E-16 | 5.56E-14 |
| SE   | chr7  | Ttc23   | + | 67843719-67847845-67862327-67862526-67867163-67867288               | 298 | 149 | 0.406  | 0.7863 | -0.38  | 0.38  | 0.000451734 | 0.006085 |
| SE   | chr10 | Ptprc   | + | 28551618-28551756-28554770-28554799-28560005-28560165               | 178 | 149 | 0.7227 | 0.3437 | 0.379  | 0.379 | 0           | 0        |
| SE   | chr16 | Sym1    | + | 9839092-98393034-98394073-98394498-98394455-98394775                | 172 | 149 | 0.8073 | 0.4303 | 0.377  | 0.377 | 1.59571E-09 | 9.16E-08 |
| SE   | chr11 | Atfp    | + | 20842465-20842598-20869571-20869621-20869813-20869873               | 298 | 149 | 0.6537 | 0.2763 | 0.377  | 0.377 | 6.13318E-11 | 5.85E-09 |
| RI   | chr17 | Mdc1    | + | 35850295-35851005-35850295-35851156-35851113-35851156               | 255 | 149 | 0.287  | 0.6423 | -0.375 | 0.375 | 2.20542E-08 | 4.84E-07 |
| SE   | chr2  | Opr1    | + | 181715690-181715946-181716502-181716535-181718377-181718732         | 182 | 149 | 0.2117 | 0.596  | -0.374 | 0.374 | 0           | 0        |
| SE   | chr2  | Kcnl1   | + | 25898699-25898835-25900158-25900286-25900372-25900480               | 277 | 149 | 0.8663 | 0.4927 | 0.374  | 0.374 | 7.54053E-06 | 0.000179 |
| SE   | chr10 | Mdm2    | - | 117705155-117705229-117709700-117709784-117709946-117710028         | 233 | 149 | 0.6947 | 0.3203 | 0.374  | 0.374 | 0           | 0        |
| A5SS | chr3  | Kap3764 | + | 88227366-88227624-88227366-88228700-88229012-88229365               | 298 | 149 | 0.7157 | 0.3423 | 0.373  | 0.373 | 0           | 0        |
| A3SS | chrX  | Tceal3  | + | 136594202-136594250-136667060-136667190-136667124-136667190         | 212 | 149 | 0.273  | 0.645  | -0.372 | 0.372 | 2.01148E-07 | 1.31E-05 |
| RI   | chr7  | Zfp606  | + | 12480935-12481026-12480935-12481181-12481118-12481181               | 239 | 149 | 0.8167 | 0.4447 | 0.372  | 0.372 | 3.64939E-05 | 0.000362 |
| A5SS | chr4  | Usp48   | + | 137617982-137619974-137617982-137620377-137621062-137621259         | 298 | 149 | 0.87   | 0.4993 | 0.371  | 0.371 | 3.69371E-13 | 6.91E-11 |
| SE   | chr15 | Scaf11  | - | 96415032-96415151-96415729-96415947-96416849-96417189               | 298 | 149 | 0.994  | 0.623  | 0.371  | 0.371 | 0           | 0        |
| SE   | chr14 | Styx    | + | 45354946-45354978-45356713-45356766-45359259-45359356               | 202 | 149 | 0.9633 | 0.5923 | 0.371  | 0.371 | 0           | 0        |
| RI   | chr19 | Hps1    | - | 42756258-42756340-42756258-42757906-42757906-42757937-42757906      | 298 | 149 | 0.79   | 0.42   | 0.37   | 0.37  | 1.38818E-07 | 2.65E-06 |
| SE   | chr4  | Lrp8    | + | 107868978-107869150-107870012-107870188-107872273-107872373         | 231 | 149 | 0.672  | 0.3017 | 0.37   | 0.37  | 0           | 0        |
| SE   | chr5  | Ddx55   | + | 124559128-124559317-124560718-124560800-124561856-124562037         | 231 | 149 | 0.989  | 0.6203 | 0.369  | 0.369 | 1.22125E-15 | 1.92E-13 |
| SE   | chr3  | Pde7a   | - | 19229688-19229768-19230256-19230352-19230957-19231101               | 245 | 149 | 0.946  | 0.5783 | 0.368  | 0.368 | 0           | 0        |
| SE   | chr9  | Clasp2  | + | 113858581-113858604-113860120-113860137-113862187-113862287         | 166 | 149 | 0.966  | 0.5983 | 0.368  | 0.368 | 0           | 0        |
| SE   | chr5  | Zfp644  | - | 106666785-106666845-106690730-106690877-106696234-106696821         | 298 | 149 | 0.096  | 0.4643 | -0.368 | 0.368 | 7.8577E-06  | 0.000186 |
| SE   | chr17 | Birc4   | + | 74593089-74593249-74594322-74594453-74594870-74595001               | 280 | 149 | 0.9023 | 0.535  | 0.367  | 0.367 | 1.44452E-05 | 0.000315 |
| SE   | chr14 | Kcnma1  | + | 23441993-23442079-23449200-23449211-23451599-23451667               | 160 | 149 | 0.968  | 0.601  | 0.367  | 0.367 | 1.18633E-08 | 5.7E-07  |
| SE   | chr15 | Oxr1    | + | 41825890-41826052-41848670-41849506-41860459-41865084               | 298 | 149 | 0.5027 | 0.136  | 0.367  | 0.367 | 1.63531E-08 | 7.56E-07 |
| SE   | chr8  | Adgr1f  | + | 83923019-83923108-83924206-83924355-83929464-83930264               | 298 | 149 | 0.474  | 0.4403 | -0.366 | 0.366 | 0           | 0        |
| SE   | chr11 | Trip1   | - | 54935958-54939735-54940711-54940882-54966021-54966121               | 298 | 149 | 0.023  | 0.7067 | 0.366  | 0.366 | 6.18176E-08 | 2.51E-06 |
| A3SS | chr11 | Baip2   | + | 120000552-120000586-120003038-120006782-120006359-120006782         | 298 | 149 | 0.633  | 0.268  | 0.365  | 0.365 | 1.84728E-07 | 1.25E-05 |
| A5SS | chr2  | Pik3cd  | - | 149655336-149655500-149655127-149655500-149654816-149654959         | 298 | 149 | 0.965  | 0.6    | 0.365  | 0.365 | 4.55191E-15 | 1.23E-12 |
| RI   | chr12 | Inf2    | + | 112612548-112612604-112612548-112615557-112614895-112615557         | 298 | 149 | 0.921  | 0.556  | 0.365  | 0.365 | 4.32865E-07 | 7.27E-06 |
| RI   | chr9  | Yfp2    | + | 21588682-21589558-21588682-21589760-21589635-21589760               | 224 | 149 | 0.792  | 0.4277 | 0.364  | 0.364 | 6.6456E-10  | 1.41E-08 |
| SE   | chr10 | Os9     | - | 127096630-127096742-127096915-127097079-127097932-127098121         | 237 | 149 | 0.2627 | 0.627  | -0.364 | 0.364 | 0           | 0        |
| SE   | chr7  | Wdr73   | - | 80897923-80897987-80898503-80898591-80900348-80900436               | 237 | 149 | 0.8047 | 0.4427 | 0.362  | 0.362 | 0           | 0        |
| SE   | chr11 | Gic1    | - | 102802841-102802916-102804281-102804512-102819054-102819686         | 298 | 149 | 0.2387 | 0.6003 | -0.362 | 0.362 | 0.00167671  | 0.002597 |
| A5SS | chr12 | Rnaseh1 | + | 28657637-28657717-28657637-28658295-28658993-28659592               | 298 | 149 | 0.876  | 0.5147 | 0.361  | 0.361 | 2.00114E-09 | 1.74E-07 |
| MXE  | chr4  | Ptprd   | - | 76594267-76594305-76765700-76765756-76956896-76956995-76981506-769  | 248 | 207 | 0.0603 | 0.4213 | -0.361 | 0.361 | 0           | 0        |
| SE   | chr11 | Socs7   | + | 97376437-97376541-97376997-97376866-97377936-97378066               | 298 | 149 | 0.933  | 0.572  | 0.361  | 0.361 | 6.57296E-12 | 5.83E-10 |
| A5SS | chr3  | Gm3764  | + | 88227366-88227624-88227366-88228694-88229012-88229365               | 298 | 149 | 0.7087 | 0.3483 | 0.36   | 0.36  | 0           | 0        |
| SE   | chr11 | Bzap1   | + | 87780882-87780953-87781302-87781370-87781490-87781593               | 217 | 149 | 0.8787 | 0.519  | 0.36   | 0.36  | 2.61569E-13 | 2.98E-11 |
| RI   | chr17 | Syngap1 | + | 26966883-26966973-26966883-26968799-26967681-26968799               | 298 | 149 | 0.8397 | 0.481  | 0.359  | 0.359 | 5.1044E-11  | 1.8E-09  |
| SE   | chr4  | Tmau1ap | - | 132325208-132325260-132325352-132325489-132328469-132328566         | 286 | 149 | 0.6053 | 0.2467 | 0.359  | 0.359 | 1.82843E-07 | 6.66E-06 |
| SE   | chr7  | Tia1f   | - | 128446195-128446270-128446731-128447107-128448121-128448208         | 298 | 149 | 0.4307 | 0.7897 | -0.359 | 0.359 | 1.74305E-14 | 2.36E-12 |
| SE   | chr5  | Atrx2   | + | 121802948-121803080-121806222-121806275-121810851-121810996         | 202 | 149 | 0.6863 | 0.3277 | 0.359  | 0.359 | 0           | 0        |
| RI   | chr6  | Tia1    | + | 86419101-86419133-86419101-86420411-86420324-86420411               | 298 | 149 | 0.8017 | 0.445  | 0.357  | 0.357 | 0           | 0        |
| SE   | chr9  | Cish    | + | 107296659-107297034-107299924-107300144-107300368-107302784         | 298 | 149 | 0.5597 | 0.203  | 0.357  | 0.357 | 7.5123E-08  | 2.98E-06 |
| SE   | chr13 | Ipo11   | - | 106857229-106857308-106857499-106857525-106860861-106860937         | 175 | 149 | 0.865  | 0.3077 | 0.357  | 0.357 | 2.18591E-06 | 6.05E-05 |
| SE   | chrX  | Fnt1    | + | 56790464-56790650-56791239-56791438-56791844-56793348               | 298 | 149 | 0.7347 | 0.3773 | 0.357  | 0.357 | 0           | 0        |
| SE   | chr5  | Zfp655  | + | 145235306-145235391-145235737-145235863-145237050-145238322         | 275 | 149 | 0.9787 | 0.623  | 0.356  | 0.356 | 6.84488E-11 | 5.01E-09 |
| A3SS | chr4  | DocK    | + | 9895316-9895476-9894669-98946763-98946829-98946754                  | 157 | 149 | 0.9587 | 0.602  | 0.355  | 0.355 | 1.68913E-13 | 4.05E-11 |
| A5SS | chr6  | Tia1    | + | 86419101-86419133-86419101-86419124-8642034-86420411                | 298 | 149 | 0.6627 | 0.298  | 0.355  | 0.355 | 0           | 0        |
| SE   | chr5  | Clp1    | + | 123583521-123583638-123586334-123586354-123589793-123590845         | 169 | 149 | 0.5657 | 0.2107 | 0.355  |       |             |          |

|      |       |          |   |                                                                    |     |       |        |         |        |       |             |          |
|------|-------|----------|---|--------------------------------------------------------------------|-----|-------|--------|---------|--------|-------|-------------|----------|
| SE   | chr7  | Prss36   | - | 12793371-127933492-127933567-127933832-127934390-127934623         | 298 | 149   | 0.4143 | 0.7533  | -0.339 | 0.339 | 6.19764E-05 | 0.001107 |
| SE   | chrX  | Enoc2    | - | 49009707-49011634-49013133-49013180-49013497-49013523              | 196 | 149   | 0.6637 | 0.3247  | 0.339  | 0.339 | 6.29045E-05 | 0.00112  |
| SE   | chr16 | Clec16a  | + | 10571494-10571599-10572918-10572923-10573300-10573423              | 154 | 149   | 0.9067 | 0.6883  | 0.338  | 0.338 | 4.28045E-13 | 4.67E-11 |
| SE   | chr8  | Tcf25    | + | 123400625-123400697-123401076-123401189-123403150-123403815        | 182 | 149   | 0.0753 | 0.4133  | -0.338 | 0.338 | 0           | 0        |
| SE   | chr10 | Tp52t1   | - | 31332373-31332969-31341140-31341178-313430312-31343026             | 267 | 149   | 0.9093 | 0.57123 | -0.338 | 0.338 | 4.67381E-07 | 1.54E-05 |
| SE   | chr9  | Zfp317   | + | 19625500-19625637-19625735-19625995-19629097-19629206              | 298 | 149   | 0.6623 | 0.324   | 0.338  | 0.338 | 0.000178364 | 0.00274  |
| SE   | chr13 | Agtbbp1  | - | 59528387-59528518-59531057-59531203-59532010-59532076              | 298 | 149   | 0.9063 | 0.5697  | 0.337  | 0.337 | 0           | 0        |
| SE   | chr15 | Kansl2   | - | 98520318-98520425-98521636-98521762-98528663-98529029              | 275 | 149   | 0.7683 | 0.4317  | -0.337 | 0.337 | 0.000125239 | 0.00202  |
| SE   | chr4  | Ptprd    | - | 76765700-76765758-76956896-76956995-76981506-76981539              | 248 | 149   | 0.1177 | 0.4543  | -0.337 | 0.337 | 1.11022E-16 | 1.97E-14 |
| SE   | chr5  | Tbc1d19  | + | 53837924-53837970-53838177-53838237-53846201-53846273              | 209 | 149   | 0.9797 | 0.6427  | 0.337  | 0.337 | 2.69862E-12 | 2.57E-10 |
| SE   | chr2  | Rapgef4  | + | 72141153-72141172-72144233-72144476-72174802-72174908              | 202 | 149   | 0.6453 | 0.3037  | 0.337  | 0.337 | 5.27185E-08 | 2.17E-06 |
| A3SS | chr9  | Dopey1   | + | 86500796-86500895-86501874-86501983-86501901-86501983              | 175 | 149   | 0.1717 | 0.5060  | -0.336 | 0.336 | 2.25676E-07 | 1.45E-05 |
| SE   | chr15 | Csad     | - | 102178527-102178616-102178781-102178832-102178936-102179160        | 200 | 149   | 0.8917 | 0.5653  | 0.336  | 0.336 | 6.59907E-07 | 2.12E-05 |
| SE   | chr10 | Mmp11    | - | 75927129-75927262-75927347-75927490-75928280-75928509              | 292 | 149   | 0.912  | 0.5757  | 0.336  | 0.336 | 4.06231E-13 | 4.46E-11 |
| MXE  | chr11 | Ctk4     | + | 51268165-51268231-51268769-51268846-51270537-51270595-51271800-512 | 226 | 207   | 0.218  | 0.553   | -0.335 | 0.335 | 8.74801E-07 | 3.98E-05 |
| SE   | chr16 | Trap1    | - | 4054754-4054909-4055797-4055870-4062330-4062401                    | 222 | 149   | 0.9827 | 0.6473  | 0.335  | 0.335 | 0           | 0        |
| SE   | chr14 | Erc2     | + | 28302876-28303010-28383824-28384043-28475803-28478537              | 298 | 149   | 0.1707 | 0.5053  | -0.335 | 0.335 | 6.27276E-14 | 7.88E-12 |
| MXE  | chr15 | Ncald    | - | 37508876-37508994-37563391-37563464-37661032-37661086-37780136-377 | 203 | 222   | 0.7703 | 0.4363  | 0.334  | 0.334 | 7.97034E-06 | 0.000266 |
| MXE  | chr6  | Krba1    | + | 48395897-48395887-48403378-48403497-48403991-48404100-48405234-484 | 268 | 298   | 0.0697 | 0.404   | -0.334 | 0.334 | 0           | 0        |
| SE   | chr1  | Ncoa2    | - | 13162073-13162288-13164896-13165102-13166896-13167106              | 298 | 149   | 0.8587 | 0.5253  | 0.333  | 0.333 | 2.16001E-09 | 1.22E-07 |
| SE   | chr9  | Cadm1    | + | 47829377-47829409-47836717-47836770-47848167-47848298              | 202 | 149   | 0.448  | 0.1147  | 0.333  | 0.333 | 0           | 0        |
| A3SS | chr1  | Silo5a1  | - | 12943980-12944112-12938989-12939200-12938989-12939127              | 221 | 149   | 0.971  | 0.6393  | 0.332  | 0.332 | 3.31948E-11 | 5.32E-09 |
| SE   | chr17 | Alc13582 | - | 27584149-27584254-27584385-27584410-27584562-27584783-27585660-275 | 298 | 174   | 0.0527 | 0.385   | -0.332 | 0.332 | 1.02508E-11 | 1.68E-09 |
| SE   | chr11 | Tanc2    | + | 105913357-105913489-105914041-105914070-105914892-105914983        | 178 | 149   | 0.6163 | 0.284   | 0.332  | 0.332 | 3.68977E-09 | 2.01E-07 |
| SE   | chr17 | Ba9b     | + | 35141830-35142082-35142498-35142605-35142727-35142839              | 256 | 149   | 0.9543 | 0.622   | 0.332  | 0.332 | 2.93326E-10 | 1.93E-08 |
| SE   | chr5  | Kmt2c    | - | 28293107-28293248-28293398-28293510-28298970-28299076              | 298 | 149   | 0.3353 | 0.666   | -0.331 | 0.331 | 6.40101E-07 | 2.09E-05 |
| SE   | chr19 | Hectd2   | + | 38599596-38599719-38601432-38601528-38604250-38604357              | 245 | 149   | 0.9307 | 0.5997  | 0.331  | 0.331 | 8.43073E-08 | 3.3E-06  |
| SE   | chr8  | Ints10   | + | 68822157-68822250-68825652-68825129-68827277-68828263              | 226 | 149   | 0.725  | 0.3943  | 0.331  | 0.331 | 1.60257E-11 | 1.33E-09 |
| SE   | chr5  | Crf2     | - | 109555273-109555357-109555507-109555660-109555619-10955581         | 298 | 149   | 0.811  | 0.4797  | 0.331  | 0.331 | 3.52128E-08 | 1.51E-06 |
| A3SS | chr3  | Carmk2d  | + | 126767514-126767579-126770785-126771846-126771774-126771846        | 298 | 149   | 0.9193 | 0.5893  | 0.33   | 0.33  | 1.14773E-10 | 1.68E-08 |
| SE   | chr19 | Komp2    | - | 45795880-45795704-45797091-45797186-45815731-45815815              | 242 | 149   | 0.6857 | 0.3557  | 0.33   | 0.33  | 2.6357E-05  | 0.000534 |
| SE   | chr16 | Tlc3     | + | 94403314-94403368-94410833-94410958-94415949-94416009              | 277 | 149   | 0.1223 | 0.4527  | -0.33  | 0.33  | 0           | 0        |
| A3SS | chr13 | Pfkfb    | - | 6598739-6598826-65988489-65989062-65988489-65988513                | 298 | 149   | 0.974  | 0.645   | 0.329  | 0.329 | 0           | 0        |
| A3SS | chr15 | Vdwhv1   | + | 58150606-58150656-58150982-58152745-58152597-58152745              | 298 | 149   | 0.5723 | 0.243   | 0.329  | 0.329 | 0.000149191 | 0.003343 |
| SE   | chr2  | Cacnb4   | - | 52465858-52465678-52465894-52465913-52467244-52467320              | 168 | 149   | 0.981  | 0.6623  | 0.329  | 0.329 | 1.11022E-16 | 1.97E-14 |
| SE   | chr1  | Trim41   | - | 48806403-48807846-48808465-48808487-48809050-48809280              | 277 | 149   | 0.945  | 0.616   | 0.329  | 0.329 | 7.5686E-09  | 1E-07    |
| SE   | chr14 | Lrch1    | + | 74786281-74786390-74793127-74793231-74795297-74795369              | 253 | 149   | 0.668  | 0.3393  | 0.329  | 0.329 | 7.4979E-05  | 0.001303 |
| MXE  | chr15 | Micall1  | + | 79108699-79109429-79115030-79115171-79119736-79119827-79120759-791 | 290 | 240   | 0.0707 | 0.4053  | -0.328 | 0.328 | 5.61987E-09 | 4.53E-07 |
| RI   | chr1  | Cntn2    | - | 132509427-132510793-132509427-132515637-132511135-132515637        | 298 | 149   | 0.837  | 0.5093  | 0.328  | 0.328 | 4.78171E-07 | 7.98E-06 |
| SE   | chr12 | Nrxn3    | + | 90283572-90283650-90321936-90322641-90331485-90334935              | 298 | 149   | 0.9003 | 0.6623  | 0.328  | 0.328 | 1.35447E-13 | 1.61E-11 |
| SE   | chr2  | Ralapa2  | - | 146412734-146412868-146418362-146418502-146421593-146421757        | 289 | 149   | 0.6973 | 0.3697  | 0.328  | 0.328 | 0.000152037 | 0.002385 |
| SE   | chr2  | Vav2     | - | 27299374-27299472-27300430-27300444-27302008-27302110              | 163 | 149   | 0.9503 | 0.6223  | 0.328  | 0.328 | 0           | 0        |
| A3SS | chr13 | Pfkp     | - | 6598739-6598826-65987859-65989040-65987859-65989011                | 277 | 149   | 0.8997 | 0.1727  | 0.327  | 0.327 | 4.44089E-16 | 1.6E-13  |
| SE   | chr2  | Vav2     | - | 27267230-27267384-27268151-27268237-27268899-27269022              | 135 | 149   | 0.4564 | 0.5267  | 0.327  | 0.327 | 3.01981E-14 | 3.95E-12 |
| A5SS | chr8  | Trmt1    | + | 84689247-84689349-84689247-84689378-84689632-84689908              | 175 | 149   | 0.3383 | 0.664   | -0.326 | 0.326 | 0.002764686 | 0.025533 |
| SE   | chr3  | Gria2    | - | 80682904-80689351-80690404-80690518-80691320-80691434              | 263 | 149   | 0.7433 | 0.4177  | 0.326  | 0.326 | 0           | 0        |
| SE   | chr4  | Trit1    | + | 123044491-123044636-123049152-123049264-123049477-123049554        | 261 | 149   | 0.9713 | 0.6457  | 0.326  | 0.326 | 2.53715E-11 | 2.02E-09 |
| A3SS | chr3  | Gm3764   | + | 88209635-88209716-88220079-88221050-88220956-88221050              | 298 | 149   | 0.7567 | 0.3197  | 0.325  | 0.325 | 2.51567E-05 | 0.000807 |
| MXE  | chr8  | Adgr11   | + | 83923019-83923108-83924206-83924356-83928298-83928382-83929464-839 | 298 | 233   | 0.32   | 0.344   | -0.324 | 0.324 | 2.0685E-09  | 1.86E-07 |
| RI   | chr8  | Pkn1     | - | 83671299-83671441-83671299-83671969-83671907-83671969              | 298 | 149   | 0.6433 | 0.1193  | 0.324  | 0.324 | 1.16338E-09 | 3.3E-08  |
| SE   | chr4  | Pik3cd   | - | 149654816-149654959-149655127-149655248-149655336-149655500        | 270 | 149   | 0.9687 | 0.645   | 0.324  | 0.324 | 3.24185E-14 | 4.22E-12 |
| SE   | chr9  | Taf1d    | + | 15311527-15311695-15312774-15312836-15313990-15314032              | 211 | 149   | 0.9513 | 0.6273  | 0.324  | 0.324 | 1.91847E-13 | 2.23E-11 |
| SE   | chr11 | Hdac5    | - | 102218416-102218490-102221768-102221851-102224734-102224955        | 232 | 149   | 0.0173 | 0.3417  | -0.324 | 0.324 | 0           | 0        |
| SE   | chr10 | Omrld2   | - | 128819954-128820105-128820261-128820514-128821542-128821631        | 298 | 149   | 0.95   | 0.626   | 0.324  | 0.324 | 4.74523E-09 | 2.53E-07 |
| SE   | chr1  | Cacna1e  | - | 154472060-154472713-154473857-154473913-15447766-154477863         | 205 | 149   | 0.7747 | 0.4503  | 0.324  | 0.324 | 4.13042E-07 | 1.38E-05 |
| SE   | chr9  | Dcun1d5  | + | 7203451-7203555-7205298-7205400-7206720-7207031                    | 251 | 149   | 0.9763 | 0.662   | 0.324  | 0.324 | 0           | 0        |
| SE   | chr4  | Casp9    | + | 141793866-141793986-141796438-141796834-141803821-141803855        | 298 | 149   | 0.1    | 0.7673  | 0.324  | 0.324 | 3.1858E-07  | 1.1E-05  |
| MXE  | chr3  | Lrrc7    | - | 158164275-158164386-158170556-158170756-158175310-158175311-158177 | 298 | 298   | 0.6183 | 0.2963  | 0.323  | 0.323 | 5.0733E-07  | 2.77E-05 |
| SE   | chr18 | Myo5b    | + | 74713548-74713632-74714826-74714974-74715959-74716078              | 297 | 149   | 0.9743 | 0.6517  | 0.323  | 0.323 | 1.10989E-07 | 4.26E-06 |
| SE   | chr18 | Rgs19    | - | 181691233-181691354-181691490-181691955-181693879-181693977        | 254 | 149   | 0.7143 | 0.391   | 0.323  | 0.323 | 3.30278E-11 | 2.58E-09 |
| SE   | chr3  | Adgr12   | - | 148815855-148817928-148818648-148818686-148820973-148821054        | 187 | 149   | 0.5543 | 0.2317  | 0.323  | 0.323 | 8.88599E-05 | 0.001509 |
| SE   | chr16 | Trap1    | - | 4054754-4054909-4060757-4060917-4062330-4062401                    | 298 | 149   | 0.9843 | 0.6622  | 0.322  | 0.322 | 0           | 0        |
| SE   | chr9  | Stac     | - | 111608821-11160921-111634806-111635085-111699998-111690348         | 298 | 149   | 0.4627 | 0.7843  | -0.322 | 0.322 | 8.81189E-05 | 0.0015   |
| A3SS | chr7  | Pdc5d    | - | 35644351-35644412-35642615-35643715-35642615-35642686              | 298 | 149   | 0.9843 | 0.6633  | 0.321  | 0.321 | 0           | 0        |
| SE   | chr4  | Eif4g3   | + | 138177917-138178010-138180490-138180607-138180547-138180607        | 175 | 149   | 0.409  | 0.73    | -0.321 | 0.321 | 0           | 0        |
| A3SS | chr5  | Sripk2   | - | 23527924-23528062-23527897-23528062-23525496-23525745              | 205 | 149   | 0.9817 | 0.6607  | 0.32   | 0.32  | 2.87115E-12 | 4.37E-10 |
| RI   | chr5  | Pigg     | + | 108336104-108336222-108336140-108336561-108336561-108336561        | 287 | 149   | 0.8193 | 0.498   | 0.321  | 0.321 | 1.22306E-06 | 1.86E-05 |
| SE   | chr7  | Grim5    | + | 88074191-88075130-88116193-88116288-88129981-88130110              | 244 | 149   | 0.28   | 0.6013  | -0.321 | 0.321 | 3.33067E-16 | 5.56E-14 |
| MXE  | chr1  | Rgs7     | - | 17505978-175059794-175066617-175066694-175076017-175076097-17507   | 229 | 226   | 0.6697 | 0.3     | 0.32   | 0.32  | 2.39175E-12 | 4.59E-10 |
| SE   | chr9  | Dync2h1  | - | 6893398-68934146-6893684-68939370-134117001-134117001              | 224 | 149   | 0.9897 | 0.6673  | 0.32   | 0.32  | 9.74272E-10 | 5.85E-08 |
| SE   | chr15 | Mfss1    | - | 589446-5894560-5894732-5894920-5895180-5895180-5895180             | 298 | 149</ |        |         |        |       |             |          |



|      |       |          |   |                                                                     |     |     |        |        |        |       |             |          |
|------|-------|----------|---|---------------------------------------------------------------------|-----|-----|--------|--------|--------|-------|-------------|----------|
| MXE  | chr9  | Gria4    | - | 4424207-4424454-4427030-4427144-4432773-4432887-4456005-4456252     | 263 | 263 | 0.3367 | 0.6427 | -0.306 | 0.306 | 7.70437E-09 | 6.05E-07 |
| SE   | chr15 | Hdac10   | - | 89126869-89126995-89127150-89127218-89127386-89127490               | 217 | 149 | 0.874  | 0.5677 | 0.306  | 0.306 | 2.56943E-07 | 9.02E-06 |
| SE   | chr14 | Dcaf11   | + | 55595953-55560121-55560441-55560627-55561210-55561414               | 298 | 149 | 0.408  | 0.7137 | -0.306 | 0.306 | 0.000454553 | 0.006111 |
| SE   | chr17 | Aars2    | + | 45509396-45509404-45514492-45514637-45514923-45515283               | 294 | 149 | 0.8947 | 0.5887 | 0.306  | 0.306 | 4.05662E-05 | 0.00077  |
| SE   | chr17 | Emard    | + | 15059344-15059469-15059766-15059984-15061069-15061182               | 298 | 149 | 0.859  | 0.5533 | 0.306  | 0.306 | 5.94107E-09 | 3.07E-07 |
| SE   | chr9  | Lrrfp2   | + | 11120575-11120584-111213813-111213914-111214114-111214273           | 250 | 149 | 0.612  | 0.3057 | 0.306  | 0.306 | 3.14839E-10 | 2.06E-08 |
| A3SS | chr5  | 43719    | + | 93167500-93167687-93175404-93176462-93176040-93176462               | 298 | 149 | 0.4893 | 0.1847 | 0.306  | 0.306 | 0.20232E-07 | 1.31E-05 |
| MXE  | chr3  | Lrrc7    | + | 158163892-158164072-158164275-158164386-158170556-158170756-1581771 | 298 | 260 | 0.1673 | 0.4723 | -0.305 | 0.305 | 2.74251E-07 | 1.51E-05 |
| MXE  | chr9  | Zfp426   | + | 20473028-20473108-20474907-20475033-20476396-20476478-20486330-204  | 231 | 275 | 0.04   | 0.345  | -0.305 | 0.305 | 1.38554E-08 | 1.06E-06 |
| MXE  | chrX  | Pzd24    | + | 73796376-73796477-73798194-73798292-73798758-73798848-73799834-738  | 239 | 247 | 0.8757 | 0.571  | 0.305  | 0.305 | 2.63189E-12 | 4.83E-10 |
| SE   | chr3  | Sort1    | + | 108354133-108354241-108355472-108355570-108356231-108356337         | 247 | 149 | 0.4723 | 0.168  | 0.304  | 0.304 | 0           | 0        |
| SE   | chr8  | Adgr1f   | + | 83923019-83923108-83924206-83924355-83926262-83926276               | 298 | 149 | 0.1597 | 0.4637 | -0.304 | 0.304 | 0           | 0        |
| SE   | chr12 | Mia1     | + | 113133185-113133337-113133496-113133576-113134001-113134812         | 229 | 149 | 0.9583 | 0.6543 | 0.304  | 0.304 | 4.6686E-11  | 3.57E-09 |
| SE   | chr4  | Eif4g3   | + | 138082893-138082988-138095909-138095929-138096752-138096931         | 169 | 149 | 0.668  | 0.3637 | 0.304  | 0.304 | 3.9688E-14  | 5.01E-12 |
| SE   | chr12 | Map3k9   | + | 81725722-81725834-81726202-81726330-81726683-81729836               | 277 | 149 | 0.5433 | 0.2397 | 0.304  | 0.304 | 0.000513974 | 0.006781 |
| SE   | chr8  | Ssbp4    | + | 70599688-70599757-70599840-70599899-70600396-70600485               | 208 | 149 | 0.5743 | 0.8787 | -0.304 | 0.304 | 1.73856E-08 | 7.95E-07 |
| SE   | chr5  | Ccdc149  | + | 52385105-52385221-52391089-52391121-52392671-52392747               | 181 | 149 | 0.8467 | 0.544  | 0.303  | 0.303 | 3.77636E-05 | 0.000724 |
| SE   | chr17 | Birc6    | + | 74593089-74593429-74594364-74594453-74594870-74595001               | 238 | 149 | 0.955  | 0.6523 | 0.303  | 0.303 | 1.35551E-08 | 6.43E-07 |
| SE   | chr1  | Nlasc    | + | 132576286-132576417-132579378-132579508-132593501-132593365         | 279 | 149 | 0.121  | 0.424  | -0.303 | 0.303 | 3.38565E-09 | 1.86E-07 |
| SE   | chr10 | Dot1l    | + | 80790611-80791561-80792143-80792773-80793507-80795461               | 249 | 149 | 0.0843 | 0.387  | -0.303 | 0.303 | 3.78508E-12 | 3.48E-10 |
| SE   | chr8  | Cacna1a  | + | 84612285-84612412-84615574-84615760-84617792-84617897               | 245 | 149 | 0.9367 | 0.6337 | 0.303  | 0.303 | 4.0048E-08  | 1.7E-06  |
| A3SS | chr19 | Chka     | + | 3864822-3871062-3874769-3875789-3875785-3875788                     | 298 | 149 | 0.9147 | 0.6127 | 0.302  | 0.302 | 1.0915E-06  | 5.43E-05 |
| SE   | chr1  | Eif2d    | + | 131163520-131163565-131164620-131164789-131165120-131165209         | 298 | 149 | 0.95   | 0.648  | 0.302  | 0.302 | 9.57409E-10 | 5.74E-08 |
| SE   | chr8  | Crrf1    | + | 70503305-70503492-70503592-70503639-70503681-70504078               | 196 | 149 | 0.814  | 0.512  | 0.302  | 0.302 | 5.11099E-07 | 1.68E-05 |
| SE   | chr9  | Afp21    | + | 112149335-112149372-112155418-112155519-112156795-112176235         | 250 | 149 | 0.456  | 0.758  | -0.302 | 0.302 | 0.000170247 | 0.002632 |
| SE   | chr17 | Mlc1     | + | 6833692-68338154-68340484-68340540-68342826-68343365                | 205 | 149 | 0.8783 | 0.5763 | 0.302  | 0.302 | 5.49601E-09 | 2.86E-07 |
| SE   | chr3  | Dok2     | + | 86791895-86792211-86793219-86793299-86793817-86793913               | 229 | 149 | 0.8767 | 0.5753 | 0.301  | 0.301 | 0           | 0        |
| SE   | chr13 | Erb2ip   | + | 103823314-103823406-103827907-103828203-103834988-103835028         | 265 | 149 | 0.488  | 0.1873 | 0.301  | 0.301 | 5.60751E-07 | 1.83E-05 |
| SE   | chr9  | Rbm7     | + | 48494019-48494181-48494283-48494387-48495155-4849530                | 253 | 149 | 0.3243 | 0.6257 | -0.301 | 0.301 | 0           | 0        |
| SE   | chr3  | Atp11b   | + | 35839049-35839214-35843571-35843698-35849434-35849564               | 274 | 149 | 0.8533 | 0.5523 | 0.301  | 0.301 | 2.22045E-16 | 3.82E-14 |
| SE   | chr15 | Pascin2  | + | 83378999-83379195-83379684-83379806-83381762-83381883               | 271 | 149 | 0.7133 | 0.4127 | 0.301  | 0.301 | 4.73013E-05 | 0.000879 |
| SE   | chr10 | Omd12    | + | 128819954-12882105-128820261-128820435-128821542-128821632          | 298 | 149 | 0.9407 | 0.6393 | 0.301  | 0.301 | 1.67175E-07 | 6.16E-06 |
| SE   | chr5  | Guf1     | + | 69561654-69561857-69563083-69563222-69564524-69564647               | 288 | 149 | 0.3113 | 0.6123 | -0.301 | 0.301 | 2.10147E-11 | 1.7E-09  |
| SE   | chr16 | Senp5    | + | 31964270-31964320-31965745-31965828-31968800-31968937               | 232 | 149 | 0.9943 | 0.6937 | 0.301  | 0.301 | 0           | 0        |
| A3SS | chr8  | Atp11a   | + | 12859314-12859479-12861912-12868728-12869420-12868728               | 298 | 149 | 0.9723 | 0.672  | 0.3    | 0.3   | 3.42926E-07 | 2.05E-05 |
| SE   | chr9  | Atr      | + | 95921653-95921832-95922748-95922907-95922937-9592348                | 298 | 149 | 0.6847 | 0.385  | 0.3    | 0.3   | 0.000178313 | 0.00274  |
| SE   | chr14 | Lmo7     | + | 101911999-101912160-101913240-101913346-101914277-101914337         | 255 | 149 | 1      | 0.7003 | 0.3    | 0.3   | 0           | 0        |
| SE   | chr10 | Pip5k1c  | + | 81314992-81315118-81315879-81315956-81317326-81317403               | 226 | 149 | 0.3047 | 0.6043 | -0.3   | 0.3   | 0           | 0        |
| SE   | chr15 | BC024139 | + | 76119517-76119829-76120003-76120136-76120254-76120338               | 282 | 149 | 0.9577 | 0.658  | 0.3    | 0.3   | 2.63986E-09 | 1.47E-07 |
| A3SS | chr7  | Map6     | + | 99323692-99323787-99326009-99330466-99330664-99330469               | 298 | 149 | 0.6787 | 0.3793 | 0.299  | 0.299 | 0.00334408  | 0.037826 |
| SE   | chr2  | Mlll10   | + | 18071125-18071204-18092168-18092834-18101458-18101512               | 298 | 149 | 0.3447 | 0.6437 | -0.299 | 0.299 | 1.52519E-06 | 4.42E-05 |
| SE   | chr5  | Gpsm1    | + | 26339636-26339706-26340405-26340584-26344602-26344758               | 298 | 149 | 0.6677 | 0.569  | 0.299  | 0.299 | 0           | 0        |
| SE   | chr5  | Ccdc64   | + | 115670154-115670300-115672144-115672155-115673080-115673196         | 160 | 149 | 0.5983 | 0.2993 | 0.299  | 0.299 | 4.84666E-10 | 3.08E-08 |
| SE   | chr10 | Pf1a2    | + | 106869879-106869972-106882736-106882744-106893432-106893513         | 157 | 149 | 0.4987 | 0.1993 | 0.299  | 0.299 | 1.5993E-10  | 1.09E-08 |
| RI   | chr5  | Hnmpd1   | + | 100034721-100034984-100034721-100035739-100035635-100035739         | 298 | 149 | 0.864  | 0.566  | 0.298  | 0.298 | 0           | 0        |
| SE   | chr17 | Ehmt2    | + | 34905342-34905456-34905610-34905711-34905910-34906058               | 250 | 149 | 0.8653 | 0.567  | 0.298  | 0.298 | 0           | 0        |
| SE   | chr2  | Opr1     | + | 181715690-181715946-181716502-181718093-181718377-181718732         | 298 | 149 | 0.2303 | 0.5287 | -0.298 | 0.298 | 2.22045E-15 | 3.42E-13 |
| SE   | chr1  | Zcchc2   | + | 106023664-106023758-106027403-106027531-106029752-106031233         | 277 | 149 | 0.8793 | 0.58   | 0.298  | 0.298 | 7.6951E-06  | 0.000182 |
| SE   | chr15 | Tmuu     | + | 85893564-85894020-85894718-85895026-85896360-85896504               | 298 | 149 | 0.9167 | 0.619  | 0.298  | 0.298 | 3.45618E-08 | 1.49E-06 |
| SE   | chr16 | Yeast2   | + | 20206084-20206245-20207624-20207793-20208419-20208577               | 298 | 149 | 0.9137 | 0.6157 | 0.298  | 0.298 | 3.35636E-09 | 1.84E-07 |
| MXE  | chr2  | Scn3a    | + | 65524604-65524876-65525695-65525786-65525877-65525968-65526497-655  | 240 | 240 | 0.4047 | 0.7017 | -0.297 | 0.297 | 7.42917E-09 | 5.89E-07 |
| SE   | chr9  | Epb412   | + | 25488951-25489003-25499776-25499943-25501578-25501631               | 298 | 149 | 0.8653 | 0.5687 | 0.297  | 0.297 | 0.00149105  | 0.016708 |
| SE   | chr13 | Atpbbp1  | + | 59514087-59514295-59517653-59517690-59525146-59525239               | 186 | 149 | 0.912  | 0.6147 | 0.297  | 0.297 | 9.22595E-14 | 1.12E-11 |
| SE   | chr8  | Ctff1    | + | 70503305-70503492-70503597-70503639-70503821-70504081               | 191 | 149 | 0.863  | 0.5627 | 0.297  | 0.297 | 3.30603E-07 | 1.13E-05 |
| SE   | chr5  | Pkrag2   | + | 24871494-24871659-24873884-24874010-24875161-24875215               | 275 | 149 | 0.9673 | 0.67   | 0.297  | 0.297 | 0           | 0        |
| SE   | chr13 | Larp4b   | + | 9158123-9158229-9158551-9158802-9164675-9164720                     | 298 | 149 | 0.8967 | 0.5997 | 0.297  | 0.297 | 0           | 0        |
| SE   | chr4  | Lrp8     | + | 107843216-107843344-107846239-107846619-107847444-107847566         | 298 | 149 | 0.3057 | 0.6027 | -0.297 | 0.297 | 0           | 0        |
| SE   | chr5  | Zc2cd5   | + | 143017883-143018073-143019328-143019429-143020324-143020374         | 250 | 149 | 0.7027 | 0.4053 | 0.297  | 0.297 | 0.000563986 | 0.007362 |
| SE   | chr17 | Zfp942   | + | 21930366-21930402-21932993-21933113-21941726-21941850               | 269 | 149 | 0.7293 | 0.4327 | 0.297  | 0.297 | 6.4595E-05  | 0.001145 |
| A3SS | chr3  | Gm3764   | + | 88227366-88227624-88228599-88229365-88229012-88229365               | 298 | 149 | 0.753  | 0.4573 | 0.296  | 0.296 | 0           | 0        |
| MXE  | chr5  | Pkrag2   | + | 24871494-24871659-24875161-24875215-24876989-24877034-24878705-248  | 194 | 203 | 0.9733 | 0.6777 | 0.296  | 0.296 | 0           | 0        |
| MXE  | chr1  | Nlasc    | + | 132576286-132576417-132579378-132579508-132589926-132583147-132588  | 298 | 279 | 0.8013 | 0.5057 | 0.296  | 0.296 | 6.02995E-06 | 0.00021  |
| RI   | chr10 | Pip5k1c  | + | 81315879-81315956-81315879-81317403-81317326-81317403               | 298 | 149 | 0.4503 | 0.154  | 0.296  | 0.296 | 0           | 0        |
| SE   | chr10 | Fnbp4    | + | 90767408-90767541-90767853-90767955-90768516-90768700               | 251 | 149 | 0.4693 | 0.173  | 0.296  | 0.296 | 8.60524E-11 | 6.17E-09 |
| SE   | chr9  | Rbm5     | + | 107754423-107754488-107755853-107755913-107756909-107756992         | 260 | 149 | 0.984  | 0.6883 | 0.296  | 0.296 | 0           | 0        |
| SE   | chr1  | Enah     | + | 181930678-181930762-181931174-181931185-181935660-181935716         | 169 | 149 | 0.9537 | 0.6577 | 0.296  | 0.296 | 1.68452E-07 | 6.19E-06 |
| SE   | chr1  | Map2     | + | 66401444-66401521-66416735-66416886-66420135-66420196               | 240 | 149 | 0.2843 | 0.5803 | -0.296 | 0.296 | 0           | 0        |
| SE   | chr19 | Hectd2   | + | 36595956-36595971-36601429-36601528-36604250-36604357               | 248 | 149 | 0.9387 | 0.643  | 0.296  | 0.296 | 8.15579E-09 | 4.09E-07 |
| A3SS | chr11 | Ybx2     | + | 69933238-69933277-69933368-69933992-69939874-69940151               | 298 | 149 | 0.815  | 0.5203 | 0.295  | 0.295 | 0.00044065  | 0.006154 |
| RI   | chr11 | Zfp207   | + | 80403365-80403652-80403365-80403857-80404741-80408557               | 298 | 149 | 0.805  | 0.51   | 0.295  | 0.295 | 0           | 0        |
| SE   | chr1  | Map2     | + | 66401444-66401521-66416735-66416886-66420135-66420196               | 240 | 149 | 0.286  | 0.5807 | -0.295 | 0.295 | 0           | 0        |
| SE   | chr1  | Nlasc    | + | 132576286-132576                                                    |     |     |        |        |        |       |             |          |

|      |       |               |   |                                                                     |     |     |        |        |        |       |             |          |
|------|-------|---------------|---|---------------------------------------------------------------------|-----|-----|--------|--------|--------|-------|-------------|----------|
| SE   | chr4  | Sl3gal3       | - | 118031840-118031882-118054650-118054697-118107549-118107693         | 196 | 149 | 0.2197 | 0.5033 | -0.284 | 0.284 | 1.89545E-07 | 4.55E-06 |
| SE   | chr6  | lfl122        | + | 115925416-115925495-115925753-115925917-115926236-115926699         | 198 | 149 | 0.9763 | 0.6923 | 0.284  | 0.284 | 0           | 0        |
| A5SS | chr6  | lflr1         | + | 108388185-108388338-108388185-108388365-108389367-108389554         | 175 | 149 | 0.885  | 0.6017 | 0.283  | 0.283 | 3.91607E-05 | 0.000811 |
| MXE  | chr16 | Typ23a        | + | 10427383-104274272-10428659-10428803-10446930-10447039-10447225-104 | 228 | 293 | 0.0713 | 0.5843 | -0.283 | 0.283 | 1.10756E-12 | 2.31E-10 |
| MXE  | chr3  | Gria2         | + | 80689103-80689351-80690404-80690515-80691320-80691434-80692285-806  | 263 | 263 | 0.9377 | 0.541  | -0.283 | 0.283 | 0           | 0        |
| SE   | chr1  | Ankr45        | + | 161163267-161163405-161164172-161164214-161167172-161170505         | 191 | 149 | 0.7687 | 0.4857 | 0.283  | 0.283 | 7.93213E-09 | 4E-07    |
| SE   | chr16 | Tlc3          | + | 94403314-94403368-94408554-94408716-94410833-94410956               | 198 | 149 | 0.6183 | 0.3357 | 0.283  | 0.283 | 0           | 0        |
| SE   | chr7  | Emsy          | - | 98600672-98600827-98602583-98602747-98610667-98610865               | 198 | 149 | 0.8793 | 0.5963 | 0.283  | 0.283 | 1.23571E-08 | 5.92E-07 |
| SE   | chr12 | Bfr1          | - | 112979685-112979757-112983027-112983058-112986458-112986552         | 180 | 149 | 0.777  | 0.494  | 0.283  | 0.283 | 5.41784E-07 | 1.77E-05 |
| SE   | chr14 | Erc2          | + | 28025033-28025173-28029434-28029469-28040343-28040536               | 184 | 149 | 0.466  | 0.183  | 0.283  | 0.283 | 4.32987E-14 | 5.53E-12 |
| SE   | chr19 | Nrxn2         | + | 6509778-6509949-6513716-6513805-6516923-6517248                     | 238 | 149 | 0.3347 | 0.6173 | -0.283 | 0.283 | 0           | 0        |
| SE   | chr1  | Nav1          | + | 135455134-135455330-135457861-135457869-135458666-135458777         | 157 | 149 | 0.601  | 0.318  | 0.282  | 0.282 | 1.73095E-12 | 1.73E-10 |
| MXE  | chr17 | Nrxn1         | + | 90033952-90037384-90059476-90059563-90162114-90162433-90208323-902  | 198 | 236 | 0.6817 | 0.4    | 0.282  | 0.282 | 2.84273E-06 | 0.001009 |
| MXE  | chr16 | Tlc3          | + | 94403314-94403368-94409684-94409729-94410833-94410956-94415949-944  | 194 | 272 | 0.679  | 0.3973 | 0.282  | 0.282 | 1.11925E-11 | 1.78E-09 |
| MXE  | chr1  | Rps6kc1       | + | 190783564-190783646-190799013-190800551-190834006-190834098-190844  | 241 | 298 | 0.9327 | 0.651  | 0.282  | 0.282 | 1.35319E-06 | 5.63E-05 |
| MXE  | chr8  | Nfix          | - | 84704712-84708677-84713766-84713857-84721643-84721818-84726469-847  | 298 | 240 | 0.093  | 0.3747 | -0.282 | 0.282 | 7.16104E-08 | 4.9E-06  |
| MXE  | chr16 | Senp5         | + | 31959670-31963537-31964270-31964320-31965745-31965828-31968800-319  | 232 | 199 | 0.5967 | 0.315  | 0.282  | 0.282 | 2.84273E-06 | 0.001009 |
| SE   | chr3  | Tars2         | + | 95750701-95750765-95750838-95750984-95751506-95751630               | 296 | 149 | 0.896  | 0.614  | 0.282  | 0.282 | 1.07413E-05 | 0.000244 |
| SE   | chr3  | Rmad1         | + | 87927021-87927117-87927563-87927660-87927924-8792810                | 246 | 149 | 0.949  | 0.6673 | 0.282  | 0.282 | 8.9923E-09  | 4.19E-07 |
| SE   | chr4  | Pum1          | + | 130701042-130701110-130718157-130718262-130741463-130741556         | 254 | 149 | 0.182  | 0.4404 | -0.282 | 0.282 | 0.00058892  | 0.007419 |
| SE   | chr15 | Pik2          | + | 73330849-73331015-73365041-73365195-73394648-73394744               | 198 | 149 | 0.5487 | 0.8363 | -0.282 | 0.282 | 0.000586176 | 0.007609 |
| SE   | chr1  | Cspp1         | + | 10083501-10083558-10084013-10089592-10088051-10088184               | 219 | 149 | 0.1913 | 0.4737 | -0.282 | 0.282 | 1.10934E-06 | 3.34E-05 |
| A3SS | chrX  | Armcx2        | + | 134807621-134807725-134807262-134807396-134807262-134807327         | 298 | 149 | 0.5137 | 0.2327 | 0.281  | 0.281 | 1.34944E-07 | 9.45E-06 |
| SE   | chr2  | Madd          | + | 91138709-91138755-91140557-91140262-91142756-91142862               | 218 | 149 | 0.206  | 0.4873 | -0.281 | 0.281 | 1.3831E-10  | 9.6E-09  |
| SE   | chr2  | Cep250        | + | 155975671-155975864-155976084-155976111-155976388-155976558         | 276 | 149 | 0.967  | 0.6863 | 0.281  | 0.281 | 5.81535E-13 | 6.23E-11 |
| SE   | chr5  | Pisf          | + | 32737337-32739373-32740624-32740788-32742210-32742475               | 298 | 149 | 0.93   | 0.6493 | 0.281  | 0.281 | 2.83271E-06 | 7.58E-05 |
| A5SS | chr4  | Rmad1         | + | 19601356-19601443-19601356-19601606-19602643-19602673               | 298 | 149 | 0.4687 | 0.189  | 0.28   | 0.28  | 1.6339E-08  | 8.09E-07 |
| SE   | chr1  | Cnrm3         | + | 36521701-36521839-36524034-36524132-36525166-36528237               | 247 | 149 | 0.3817 | 0.1017 | 0.28   | 0.28  | 3.04984E-11 | 2.4E-09  |
| MXE  | chr1  | Clasp1        | + | 118525297-118525455-118531978-118532085-118536135-118536197-118536  | 256 | 211 | 0.1173 | 0.3967 | -0.279 | 0.279 | 1.16362E-12 | 2.4E-10  |
| SE   | chr1  | Rcoo3         | + | 192098769-192101155-192101626-192101867-192108644-192108701         | 198 | 149 | 0.8477 | 0.5687 | 0.279  | 0.279 | 0.000920232 | 0.011141 |
| SE   | chr2  | Scn3a         | + | 65525895-65525786-65525877-65525968-65526497-65526625               | 240 | 149 | 0.215  | 0.4943 | -0.279 | 0.279 | 4.99833E-05 | 0.000923 |
| SE   | chr16 | Golb1         | + | 36885011-36885188-36886134-36886228-36887239-36887403               | 243 | 149 | 0.9413 | 0.6623 | 0.279  | 0.279 | 7.34885E-06 | 9.65E-05 |
| SE   | chr1  | Tceb1         | + | 16647955-16648007-16656296-16656459-16656992-16657119               | 298 | 149 | 0.5263 | 0.2477 | 0.279  | 0.279 | 5.30467E-11 | 4E-09    |
| SE   | chr7  | Ijflr1        | + | 30566164-30566381-30566749-30566936-30567143-30567500               | 198 | 149 | 0.8873 | 0.6087 | 0.279  | 0.279 | 2.39517E-05 | 0.00049  |
| MXE  | chr16 | Tlc3          | + | 94403314-94403368-94408554-94408716-94410833-94410956-94415949-944  | 298 | 272 | 0.7713 | 0.4933 | 0.278  | 0.278 | 0           | 0        |
| MXE  | chr15 | Ptk2          | + | 73325749-73325836-73343133-73343359-73385041-73386195-73394648-733  | 298 | 298 | 0.984  | 0.4723 | -0.278 | 0.278 | 1.27993E-10 | 7.62E-08 |
| RI   | chr10 | Mylb8         | + | 128497201-128497417-128497201-128497714-128497646-128497714         | 298 | 149 | 0.7637 | 0.486  | 0.278  | 0.278 | 2.55723E-05 | 0.000266 |
| RI   | chr10 | Pip4k2c       | + | 127197067-127198748-127197067-127199144-127199144-127199144         | 298 | 149 | 0.9667 | 0.6887 | 0.278  | 0.278 | 0           | 0        |
| SE   | chr8  | Adgr11        | + | 83923019-83923108-83924206-83924355-83926258-83926276               | 198 | 149 | 0.5667 | 0.8443 | -0.278 | 0.278 | 2.3415E-06  | 6.42E-05 |
| SE   | chr10 | Ank3          | + | 69980272-69980394-69980824-69980850-69982116-69982161               | 175 | 149 | 0.5177 | 0.24   | 0.278  | 0.278 | 3.78031E-13 | 4.19E-11 |
| SE   | chr9  | Golga4        | + | 118577142-118577228-118579542-118579606-118581849-118582408         | 213 | 149 | 0.8497 | 0.5717 | 0.278  | 0.278 | 1.91114E-12 | 1.89E-10 |
| SE   | chr10 | Ptpkr         | + | 28560005-28560165-28562107-28562142-28566495-28566679               | 184 | 149 | 0.814  | 0.5357 | 0.278  | 0.278 | 6.16099E-07 | 1.99E-05 |
| SE   | chr9  | Mnsant2       | + | 37487766-37489833-37513614-37513703-37513737-37517459               | 238 | 149 | 0.3363 | 0.614  | -0.278 | 0.278 | 0.00105553  | 0.001748 |
| SE   | chr3  | Mfn1          | + | 32563012-32563138-32563375-32563493-32563793-32563895               | 267 | 149 | 0.965  | 0.687  | 0.278  | 0.278 | 2.08944E-13 | 2.42E-11 |
| SE   | chr2  | Fam188a       | + | 12386609-12386679-12410001-12410080-12419159-12419460               | 228 | 149 | 0.581  | 0.8577 | -0.277 | 0.277 | 1.58183E-07 | 5.84E-06 |
| A5SS | chr2  | Gfra4         | + | 131041016-131041150-131040951-131041150-131039632-131040325         | 213 | 149 | 0.7963 | 0.52   | 0.276  | 0.276 | 0.000231553 | 0.003478 |
| SE   | chr16 | Itns1         | + | 91841489-91841610-91842628-91842642-91848722-91848969               | 163 | 149 | 0.3503 | 0.074  | 0.276  | 0.276 | 0           | 0        |
| A5SS | chr1  | Taf1a         | + | 183408610-183408724-183408610-183408763-183409235-183410201         | 187 | 149 | 0.6813 | 0.4067 | 0.275  | 0.275 | 0.00178627  | 0.002804 |
| RI   | chr8  | C230057M02Rik | + | 122729771-122735056-122729771-122738893-122735738-122738893         | 198 | 149 | 0.8307 | 0.566  | 0.275  | 0.275 | 0.000730828 | 0.004827 |
| SE   | chr2  | Slc8a2        | + | 16150341-16150444-16150574-16150591-16152819-16152943               | 196 | 149 | 0.862  | 0.587  | 0.275  | 0.275 | 2.49578E-13 | 2.86E-11 |
| SE   | chr2  | Dusp15        | + | 152949038-152949120-152950621-152950654-152951335-152951405         | 182 | 149 | 0.873  | 0.598  | 0.275  | 0.275 | 6.55195E-11 | 4.83E-09 |
| SE   | chr3  | Amt           | + | 95490255-95490378-95490553-95490665-95491023-95491170               | 251 | 149 | 0.7863 | 0.511  | 0.275  | 0.275 | 6.35639E-07 | 2.05E-05 |
| SE   | chr15 | Mapk15        | + | 75994845-75994943-75995072-75995101-75995234-75995324               | 178 | 149 | 0.6803 | 0.4053 | 0.275  | 0.275 | 0.001793373 | 0.019491 |
| SE   | chr4  | Casp9         | + | 141793612-141793986-141796435-141796834-141803821-141803855         | 198 | 149 | 1      | 0.7253 | 0.275  | 0.275 | 9.82135E-07 | 3.01E-05 |
| SE   | chr5  | Fryl          | + | 73050302-73050505-73050867-73050875-73054053-73054229               | 157 | 149 | 0.3937 | 0.1187 | 0.275  | 0.275 | 8.47917E-07 | 2.64E-05 |
| SE   | chr7  | Pknox         | + | 44859888-44859945-44860077-44860184-44860360-44860431               | 256 | 149 | 0.9037 | 0.6287 | 0.275  | 0.275 | 1.37174E-09 | 7.99E-08 |
| MXE  | chr3  | Cp            | + | 19987933-19988072-19989053-19989216-20005467-20005571-20008540-200  | 298 | 253 | 0.5897 | 0.8633 | -0.274 | 0.274 | 0.00168057  | 0.003496 |
| RI   | chr13 | Slc38a9       | + | 112731499-112735864-112731499-112738751-112738751-112738751         | 298 | 149 | 0.9167 | 0.6427 | 0.274  | 0.274 | 0.00128497  | 0.010067 |
| SE   | chr19 | Syt7          | + | 104179634-10418042-10421757-10421888-10435550-10435685              | 280 | 149 | 0.4887 | 0.7623 | -0.274 | 0.274 | 2.10814E-09 | 1.2E-07  |
| MXE  | chr10 | Dph7          | + | 24962174-24962810-24963203-24963156-24963456-24963543-24965557-249  | 282 | 236 | 0.5643 | 0.2931 | 0.273  | 0.273 | 0.00100452  | 0.002266 |
| MXE  | chr16 | Robo1         | + | 72145614-72145748-72563700-72563783-72742126-72742452-72904630-729  | 232 | 298 | 0.3923 | 0.1197 | 0.273  | 0.273 | 0.20196E-11 | 1.2E-08  |
| RI   | chr8  | C230057M02Rik | + | 122729771-122734273-122729771-122735056-122735056-122735056         | 198 | 149 | 0.789  | 0.5157 | 0.273  | 0.273 | 0.008618219 | 0.037978 |
| SE   | chr11 | Kif1c         | + | 70700323-70700709-70702446-70702551-70702772-70702905               | 254 | 149 | 0.6587 | 0.386  | 0.273  | 0.273 | 0.000362648 | 0.005018 |
| SE   | chr2  | Metap1d       | + | 71512126-71512168-71522533-71522630-71523802-71523849               | 246 | 149 | 0.989  | 0.716  | 0.273  | 0.273 | 1.3441E-11  | 1.13E-09 |
| SE   | chr9  | Vpp1          | + | 112143309-112143538-112147423-112147482-112149353-112149372         | 208 | 149 | 0.4387 | 0.7113 | -0.273 | 0.273 | 6.61851E-09 | 3.39E-07 |
| SE   | chr6  | Yozp2         | - | 57747711-57747788-57808536-57808592-57824927-57825166               | 298 | 149 | 0.245  | 0.518  | -0.273 | 0.273 | 1.42678E-13 | 1.49E-11 |
| SE   | chr19 | Tmem180       | + | 46369237-46369333-46371936-4637107-46372182-46372375                | 198 | 149 | 0.9637 | 0.6903 | 0.273  | 0.273 | 3.61699E-07 | 1.22E-05 |
| SE   | chr11 | Epr2          | - | 61533571-61533681-61534578-61534613-61535271-61535383               | 184 | 149 | 0.4213 | 0.1487 | 0.273  | 0.273 | 1.11022E-16 | 1.97E-14 |
| SE   | chr15 | Rfbp2         | + | 77080607-77086155-77089862-77089993-77097940-77098072               | 198 | 149 | 0.323  | 0.0497 | 0.273  | 0.273 | 1.90958E-14 | 2.58E-12 |
| SE   | chr9  | Pkn           | + | 58671921-58672073-58675029-58675745-586                             |     |     |        |        |        |       |             |          |

|      |       |          |   |                                                                    |     |     |        |        |        |       |             |          |
|------|-------|----------|---|--------------------------------------------------------------------|-----|-----|--------|--------|--------|-------|-------------|----------|
| SE   | chr19 | Carmm1   | + | 18693649-18693762-18703361-18703464-18704020-18704792              | 252 | 149 | 0.8853 | 0.619  | 0.266  | 0.266 | 3.59642E-05 | 0.000695 |
| A5SS | chr6  | Ptprz1   | + | 22999200-23000199-22999200-23002746-23007274-23007418              | 298 | 149 | 0.893  | 0.6283 | 0.265  | 0.265 | 0           | 0        |
| A5SS | chr6  | Dtcr1    | + | 83179599-83179811-83179599-83179903-83182524-83182769              | 242 | 149 | 0.9027 | 0.6373 | 0.265  | 0.265 | 1.62421E-06 | 5.77E-05 |
| SE   | chr2  | lthc     | + | 155138196-155138272-155157774-155157975-155163393-155163483        | 298 | 149 | 0.366  | 0.1007 | 0.265  | 0.265 | 4.05231E-13 | 4.45E-11 |
| SE   | chr1  | Clasp1   | + | 118525297-118525455-118531978-118532085-118536151-118536197        | 256 | 149 | 0.1853 | 0.45   | -0.265 | 0.265 | 3.9666E-11  | 3.06E-09 |
| SE   | chr4  | Ptprd    | - | 76133063-76133332-76135545-76135566-76136811-76136921              | 160 | 149 | 0.945  | 0.68   | 0.265  | 0.265 | 0           | 0        |
| SE   | chr5  | Nup54    | - | 92424274-92424470-92425623-92425810-92428100-92428326              | 298 | 149 | 0.9223 | 0.6573 | 0.265  | 0.265 | 0           | 0        |
| MXE  | chr1  | Slco5a1  | - | 12881293-12881452-12894427-12894625-12939899-12939127-12943980-129 | 287 | 298 | 0.0383 | 0.3023 | -0.264 | 0.264 | 4.12465E-07 | 2.12E-05 |
| RI   | chr2  | Snhq11   | + | 158380939-158381040-158380939-158386145-158382504-158386145        | 298 | 149 | 0.9803 | 0.7167 | 0.264  | 0.264 | 0           | 0        |
| SE   | chr17 | Nrxn1    | + | 90560741-90560860-90561802-90561828-90565305-90565478              | 175 | 149 | 0.4127 | 0.149  | 0.264  | 0.264 | 1.662E-13   | 1.96E-11 |
| SE   | chr5  | Adgrl3   | + | 81771584-81771680-81792361-81792412-81794264-81802140              | 200 | 149 | 0.724  | 0.4603 | 0.264  | 0.264 | 1.42422E-06 | 4.16E-05 |
| SE   | chr4  | Usp1     | + | 98923810-98924243-98926455-98926674-98926234-98928324              | 298 | 149 | 0.6807 | 0.4163 | 0.264  | 0.264 | 2.7078E-07  | 9.45E-06 |
| SE   | chr7  | Tlal1    | - | 128446195-128446270-128446731-128446798-128448121-128448208        | 216 | 149 | 0.417  | 0.6807 | -0.264 | 0.264 | 8.84595E-08 | 2.01E-06 |
| SE   | chr15 | Ttcp2    | - | 100520563-100520715-100522389-100522495-100525567-100525672        | 255 | 149 | 0.77   | 0.5063 | 0.264  | 0.264 | 4.09108E-05 | 0.000775 |
| A3SS | chr13 | Grik6    | + | 55459013-55459147-55459782-55460927-55459784-55460927              | 150 | 149 | 0.6413 | 0.3787 | 0.263  | 0.263 | 1.4969E-08  | 1.4E-06  |
| RI   | chr11 | Cdk13    | + | 52084371-52084490-52084371-52089778-52089589-52089778              | 298 | 149 | 0.5157 | 0.253  | 0.263  | 0.263 | 1.84671E-06 | 2.69E-05 |
| SE   | chr2  | Nsun6    | - | 15038074-15038227-15039733-15039842-15042227-15042306              | 258 | 149 | 0.9373 | 0.6743 | 0.263  | 0.263 | 8.88202E-05 | 0.001509 |
| SE   | chr18 | Fhod3    | + | 25001791-25002032-25022622-25022978-25028065-25028169              | 298 | 149 | 0.0473 | 0.3103 | -0.263 | 0.263 | 6.66134E-16 | 1.08E-13 |
| SE   | chr2  | Rbck1    | - | 152322160-152322271-152323172-15232332-152324267-152324440         | 298 | 149 | 0.8113 | 0.5483 | 0.263  | 0.263 | 3.5887E-12  | 3.13E-10 |
| SE   | chr2  | Pfif21a  | + | 92320229-92320459-92326913-92327164-92328315-92328401              | 298 | 149 | 0.8373 | 0.5747 | 0.263  | 0.263 | 6.87325E-05 | 0.001209 |
| SE   | chr9  | Arpp21   | - | 112143309-112143538-112147423-112147749-112149335-112149372        | 205 | 149 | 0.2863 | 0.5497 | -0.263 | 0.263 | 2.12851E-06 | 5.91E-05 |
| SE   | chr11 | Cbx1     | + | 96802728-96802822-96806616-96806794-96807803-96808149              | 298 | 149 | 0.925  | 0.662  | 0.263  | 0.263 | 0           | 0        |
| SE   | chr11 | Tvp23b   | + | 62885076-62886165-62886189-62886320-62891942-62892070              | 280 | 149 | 0.907  | 0.6437 | 0.263  | 0.263 | 3.35731E-13 | 3.75E-11 |
| SE   | chr2  | H13      | + | 152700183-152700268-152703995-152704141-152704622-152705052        | 298 | 149 | 0.9167 | 0.3023 | 0.263  | 0.263 | 0           | 0        |
| SE   | chr10 | Aqa2     | + | 127089230-127089358-127090142-127090201-127090427-127090575        | 208 | 149 | 0.9687 | 0.6537 | 0.263  | 0.263 | 0           | 0        |
| A5SS | chr2  | Gifra    | + | 131041016-131041150-131040899-131041150-131036932-131040325        | 275 | 149 | 0.8463 | 0.584  | 0.262  | 0.262 | 3.50321E-05 | 0.000735 |
| SE   | chr1  | Nkap4k   | + | 40007433-40007530-40008331-40008339-40009888-40009863              | 157 | 149 | 0.9307 | 0.6687 | 0.262  | 0.262 | 0           | 0        |
| SE   | chr9  | Nelf1    | + | 57143451-57143613-57143758-57143819-57143879-57144006              | 210 | 149 | 0.51   | 0.2477 | 0.262  | 0.262 | 0.000394365 | 0.00539  |
| SE   | chr3  | Cpsm2    | - | 108702865-108703086-108711277-108711580-108722041-108722299        | 298 | 149 | 0.8697 | 0.608  | 0.262  | 0.262 | 1.55613E-05 | 0.000335 |
| SE   | chr2  | Mllt10   | + | 18071125-18071204-18092784-18092834-18101458-18101512              | 199 | 149 | 0.1613 | 0.4233 | -0.262 | 0.262 | 0.000164594 | 0.002556 |
| A5SS | chr19 | Fam178a  | + | 44941459-44942426-44941459-44942939-44943449-44943519              | 298 | 149 | 0.6887 | 0.4277 | 0.261  | 0.261 | 4.63251E-09 | 3.58E-07 |
| SE   | chr12 | Ralapaq1 | + | 55602890-55604268-55612073-55612103-55612634-55612758              | 179 | 149 | 0.976  | 0.715  | 0.261  | 0.261 | 0           | 0        |
| SE   | chr6  | Hnmpa2b1 | + | 51461121-51461433-51462339-51463254-51463411-51463493              | 298 | 149 | 0.9783 | 0.7177 | 0.261  | 0.261 | 0           | 0        |
| SE   | chr6  | Inq3     | + | 21949615-21949793-21950038-21950220-21952129-21952229              | 298 | 149 | 0.9083 | 0.647  | 0.261  | 0.261 | 3.37245E-05 | 0.000659 |
| SE   | chr9  | Lrrc49   | + | 60610258-60610421-60614999-60615177-60621569-60621716              | 298 | 149 | 0.9833 | 0.7227 | 0.261  | 0.261 | 0           | 0        |
| SE   | chr6  | Tac1     | + | 7556684-7556780-7557216-7557260-7557720-7557743                    | 193 | 149 | 0.372  | 0.6327 | -0.261 | 0.261 | 5.16877E-10 | 3.27E-08 |
| SE   | chr15 | Rbfco2   | + | 77086067-77086155-77094451-77094497-77097940-77098072              | 188 | 149 | 0.904  | 0.643  | 0.261  | 0.261 | 0           | 0        |
| MXE  | chr9  | Map2k5   | + | 63194202-63194247-63197311-63197372-63216993-63217025-63235289-632 | 211 | 210 | 0      | 0.2597 | -0.26  | 0.26  | 7.14598E-11 | 9.64E-09 |
| MXE  | chr13 | Atxn1    | + | 45735115-45735178-45795509-45795663-45956456-45956675-45963574-459 | 298 | 277 | 0.0633 | 0.323  | -0.26  | 0.26  | 2.37921E-05 | 0.000675 |
| RI   | chr6  | Mag1     | + | 93675453-93679002-93675453-93683090-93682952-93683090              | 298 | 149 | 0.787  | 0.527  | 0.26   | 0.26  | 2.09288E-12 | 9.49E-11 |
| SE   | chr11 | Lrrc45   | + | 120717480-120717538-120717641-120717902-120718037-120718172        | 298 | 149 | 0.8127 | 0.5527 | 0.26   | 0.26  | 0.000286741 | 0.004114 |
| SE   | chr9  | Lrrfp2   | + | 111205755-111205847-111207797-111207889-111213813-111213914        | 241 | 149 | 0.1457 | 0.4057 | -0.26  | 0.26  | 0.000732385 | 0.009201 |
| SE   | chr2  | Chchd5   | + | 129129700-129129857-129130401-129130566-129133275-129134112        | 298 | 149 | 0.488  | 0.7483 | -0.26  | 0.26  | 2.60251E-05 | 0.000527 |
| SE   | chr15 | Phk2     | - | 73343133-73343369-73365041-73365195-73394648-73397444              | 298 | 149 | 0.2273 | 0.48   | -0.26  | 0.26  | 2.04976E-08 | 9.25E-07 |
| SE   | chr14 | Erc2     | + | 28317249-28317314-28383906-28384043-28475603-28478537              | 286 | 149 | 0.147  | 0.407  | -0.26  | 0.26  | 6.31939E-13 | 6.72E-11 |
| A5SS | chr18 | Poi1     | + | 70530188-70530321-70529751-70530321-70528770-70528827              | 298 | 149 | 0.4777 | 0.737  | -0.259 | 0.259 | 0.001511688 | 0.015755 |
| MXE  | chr5  | Prkaq2   | + | 24871494-24871659-24875161-24875215-24878705-24878763-24880684-248 | 207 | 203 | 0.9803 | 0.721  | 0.259  | 0.259 | 0           | 0        |
| MXE  | chr10 | Fam229b  | + | 39118804-39119034-39120258-39120396-39122177-39122335-39132247-391 | 298 | 287 | 0.5627 | 0.823  | 0.259  | 0.259 | 5.33639E-10 | 5.81E-08 |
| MXE  | chr16 | Senp5    | + | 31964270-31964320-31968800-31968931-31977680-31977757-31983264-319 | 226 | 286 | 0.938  | 0.6793 | 0.259  | 0.259 | 7.23472E-07 | 3.43E-05 |
| SE   | chr1  | Pogk     | + | 166408399-166408532-166408998-166409331-166409377-166409828        | 298 | 149 | 0.8223 | 0.5637 | 0.259  | 0.259 | 8.73937E-09 | 4.35E-07 |
| SE   | chr2  | Osbpl6   | + | 76406601-76406689-76407175-76407605-76499257-76499422              | 214 | 149 | 0.1063 | 0.3653 | -0.259 | 0.259 | 1.16724E-05 | 0.000262 |
| SE   | chr5  | Smurf1   | + | 144897983-144898058-144899147-144899212-144899365-144899498        | 298 | 149 | 0.9717 | 0.71   | 0.259  | 0.259 | 5.55112E-16 | 9.03E-14 |
| SE   | chrX  | BC065397 | + | 136759856-136759918-136760418-136760575-136761991-136762088        | 298 | 149 | 0.9853 | 0.726  | 0.259  | 0.259 | 3.88674E-07 | 1.31E-05 |
| SE   | chr8  | Rfx1     | + | 84094727-84094876-84094950-84095158-84095396-84095549              | 298 | 149 | 0.9853 | 0.727  | 0.258  | 0.258 | 1.79823E-12 | 1.79E-10 |
| SE   | chr14 | Cserr2   | + | 36888571-368885790-36890342-36890426-36896255-36896344             | 233 | 149 | 0.9927 | 0.735  | 0.258  | 0.258 | 0           | 0        |
| SE   | chr13 | Spock1   | + | 57426091-57429485-57430289-57430426-57436110-57436172              | 286 | 149 | 0.9573 | 0.6928 | 0.258  | 0.258 | 0           | 0        |
| SE   | chr6  | Hnmpa2b1 | + | 51461121-51461433-51461983-51463254-51463411-51463493              | 298 | 149 | 0.9793 | 0.7217 | 0.258  | 0.258 | 0           | 0        |
| SE   | chr6  | Erc1     | + | 119694571-119694731-119713680-119713811-119722173-119722308        | 280 | 149 | 0.1687 | 0.4267 | -0.258 | 0.258 | 3.10862E-14 | 4.06E-12 |
| SE   | chr12 | Entpd5   | + | 84396679-84396658-84399340-84399412-84405406-84405475              | 229 | 149 | 0.436  | 0.1763 | 0.258  | 0.258 | 0.00033458  | 0.009216 |
| SE   | chr4  | Nof9     | + | 152045695-152045830-152045945-152046035-152046634-152046644        | 231 | 149 | 0.7707 | 0.5127 | 0.258  | 0.258 | 0.004916424 | 0.045512 |
| MXE  | chr7  | Ptprb5   | + | 47089777-47090018-47090421-47090504-47090727-47090834-47091377-470 | 256 | 232 | 0.4887 | 0.232  | 0.257  | 0.257 | 0           | 0        |
| MXE  | chr9  | Map2k5   | + | 63216993-63217025-63217339-63217366-63235289-63235318-63256977-632 | 178 | 175 | 0.2203 | 0.4777 | -0.257 | 0.257 | 0.000991597 | 0.014924 |
| MXE  | chrX  | Cnkr2    | + | 157872105-157872153-157910117-157910250-157919176-157919892-157934 | 298 | 282 | 0.349  | 0.6057 | -0.257 | 0.257 | 0.000386947 | 0.00699  |
| SE   | chr3  | Rbm39    | + | 156177336-156177385-156177386-156178952-156178980-156178982        | 298 | 149 | 0.4307 | 0.1733 | 0.257  | 0.257 | 0           | 0        |
| SE   | chr3  | Sy6      | + | 103626982-103627132-103630902-103630969-103632447-103635178        | 216 | 149 | 0.9237 | 0.6663 | 0.257  | 0.257 | 9.55125E-13 | 9.92E-11 |
| SE   | chr16 | Tvp23a   | + | 10427383-10427472-10428659-10428803-10446930-10447009              | 298 | 149 | 0.9257 | 0.669  | 0.257  | 0.257 | 2.27596E-14 | 3.02E-12 |
| SE   | chr16 | Chrd     | + | 20735746-20735893-20736264-20736383-20736909-20737065              | 268 | 149 | 0.7973 | 0.54   | 0.257  | 0.257 | 0.000578401 | 0.007527 |
| SE   | chr17 | Adamt10  | + | 33544955-33545057-33545304-33545437-33545542-33545665              | 282 | 149 | 0.8763 | 0.6197 | 0.257  | 0.257 | 1.73247E-10 | 8.92E-09 |
| SE   | chr8  | Dcd1     | + | 4813258-48137374-48138179-48138878-48140343-48141667               | 298 | 149 | 0.99   | 0.7333 | 0.257  | 0.257 | 3.32429E-09 | 1.78E-07 |
| SE   | chr4  | Ank6     | + | 47023744-47023860-47024506-47024679-47025886-47025753              | 298 | 149 | 0.7073 | 0.4507 | 0.257  | 0.257 | 0.005183669 | 0.047606 |
| A5SS | chr2  | Hsp5     | + | 46719677-46719802-46719811-46719821-46719831-46719841              | 247 | 149 | 0.8417 | 0.566  | 0.2    |       |             |          |



|      |       |               |   |                                                                    |     |     |          |        |        |       |             |          |
|------|-------|---------------|---|--------------------------------------------------------------------|-----|-----|----------|--------|--------|-------|-------------|----------|
| SE   | chr16 | Dnm11         | - | 16316602-16316778:16318445-16318477:16319452-16319508              | 181 | 149 | 0.945    | 0.708  | 0.237  | 0.237 | 2.6823E-13  | 3.06E-11 |
| A3SS | chr9  | Mrip4         | + | 21006827-21006856:21007264-21007540:21007364-21007540              | 248 | 149 | 0.9347   | 0.6983 | 0.236  | 0.236 | 8.08378E-05 | 0.002051 |
| MXE  | chr3  | Pogz          | + | 94856043-94856201:94860796-94860971:94862422-94862530:94864485-948 | 298 | 257 | 0.9687   | 0.7327 | 0.236  | 0.236 | 3.10862E-14 | 7.77E-12 |
| RI   | chr8  | Hook2         | + | 84998204-84998291:84998204-84998391:84998386-84998391              | 242 | 149 | 0.5797   | 0.8137 | -0.236 | 0.236 | 1.10289E-05 | 0.000127 |
| SE   | chr16 | Syn11         | + | 90969183-90969374:90971564-90971587:90973910-90974066              | 172 | 149 | 0.9493   | 0.7153 | -0.236 | 0.236 | 2.59903E-13 | 2.97E-11 |
| SE   | chr13 | Kif2a         | + | 106968638-106968788:106969704-106969817:10697495-106974562         | 262 | 149 | 0.8907   | 0.6543 | 0.236  | 0.236 | 2.23155E-14 | 2.98E-12 |
| SE   | chr16 | Rad52         | + | 119902198-119902835:119915967-119916042:119918587-119918786        | 224 | 149 | 0.647    | 0.8833 | -0.236 | 0.236 | 0.001032827 | 0.012271 |
| SE   | chr16 | Vps8          | + | 21448349-21448403:21451356-21451361:21456229-21456353              | 154 | 149 | 0.6587   | 0.4217 | 0.236  | 0.236 | 0.00337691  | 0.003324 |
| SE   | chr3  | 4932438A13Rik | + | 36989795-36989888:36992677-36992727:36994775-36994981              | 199 | 149 | 0.989867 | 0.7527 | 0.236  | 0.236 | 1.00142E-13 | 1.21E-11 |
| SE   | chr1  | Map2          | + | 66401444-66401521:66416735-66416866:66420138-66420196              | 280 | 149 | 0.646    | 0.881  | -0.235 | 0.235 | 6.64139E-09 | 3.4E-07  |
| SE   | chr19 | Sbx3          | - | 11789557-11789631:11790048-11790093:11791746-11791845              | 194 | 149 | 0.5973   | 0.362  | 0.235  | 0.235 | 0.001298287 | 0.014902 |
| SE   | chr14 | Slmap         | + | 26413168-26414988:26416203-26416292:26418113-26418247              | 238 | 149 | 0.6357   | 0.4007 | 0.235  | 0.235 | 0.000222415 | 0.003307 |
| SE   | chr14 | Fem12         | + | 45462116-45462240:45462715-45462735:45464724-45464945              | 169 | 149 | 0.252    | 0.0173 | 0.235  | 0.235 | 0           | 0        |
| SE   | chr4  | Ubp2          | + | 41235517-41235594:41245466-41245492:41251536-41251671              | 185 | 149 | 0.1167   | 0.352  | -0.235 | 0.235 | 2.35034E-13 | 2.71E-11 |
| SE   | chr8  | Rnf170        | + | 26129047-26129155:26135629-26135702:26138980-26139090              | 222 | 149 | 0.9613   | 0.7267 | -0.235 | 0.235 | 9.22482E-09 | 4.57E-07 |
| SE   | chr3  | Slc44a5       | + | 154265459-154265543:154267677-154268620:154269893-154270047        | 298 | 149 | 0.735    | 0.5    | 0.235  | 0.235 | 0.000592011 | 0.007675 |
| SE   | chr9  | Mifn1         | + | 88688605-88688985:88715488-88715749:88719489-88719605              | 298 | 149 | 0.615    | 0.8497 | -0.235 | 0.235 | 6.19404E-05 | 0.001107 |
| A5SS | chr2  | Baz2b         | + | 59907544-59907749:59907439-59907749:59909616-59907051              | 253 | 149 | 0.5783   | 0.3443 | 0.234  | 0.234 | 1.01175E-05 | 0.000263 |
| A5SS | chr8  | Par6a         | + | 105701148-105701286:105701148-105701317:105702174-105702396        | 179 | 149 | 0.433    | 0.199  | 0.234  | 0.234 | 0.002211154 | 0.021521 |
| A5SS | chr5  | Mif2          | + | 108069162-108069363:108069162-108069523:108080255-108081023        | 298 | 149 | 0.5113   | 0.2777 | 0.234  | 0.234 | 0.000173878 | 0.002761 |
| MXE  | chr11 | Atf9          | + | 20692465-20692588:20696751-20696831:20698313-20698373:20703711-207 | 209 | 229 | 0.527    | 0.7613 | -0.234 | 0.234 | 1.14618E-05 | 0.000357 |
| SE   | chr18 | Sprat2        | + | 35660444-35660574:35660792-35660891:35662012-35662031              | 248 | 149 | 0.9743   | 0.7403 | 0.234  | 0.234 | 5.21126E-08 | 2.15E-06 |
| SE   | chr10 | Uhrf1bp1      | + | 89745002-89745288:89755421-89755654:89772587-89772749              | 282 | 149 | 0.08     | 0.314  | -0.234 | 0.234 | 8.88178E-16 | 1.42E-13 |
| SE   | chr11 | Mbt1          | + | 93933881-93933958:93939521-93939712:93943662-93943864              | 298 | 149 | 0.2627   | 0.497  | -0.234 | 0.234 | 0.001431825 | 0.016146 |
| SE   | chr7  | 2410002F23Rik | + | 44246720-44246808:44247251-44247416:44248252-44248295              | 298 | 149 | 0.518    | 0.2837 | 0.234  | 0.234 | 7.54808E-06 | 0.000179 |
| SE   | chr15 | Zfp740        | + | 102209236-102209361:102208753-10220976:102209155-102209273         | 272 | 149 | 0.903    | 0.6693 | 0.234  | 0.234 | 1.89738E-14 | 2.59E-12 |
| SE   | chr9  | Ecd3          | + | 57713381-57713351:57715948-57716267:57727186-57727521              | 298 | 149 | 0.735    | 0.5007 | 0.234  | 0.234 | 2.81742E-09 | 1.57E-07 |
| SE   | chr9  | Pfkfb4        | + | 108992022-108992112-108998842-108998975-108999113-108999209        | 282 | 149 | 0.9877   | 0.754  | 0.234  | 0.234 | 3.35489E-09 | 1.33E-07 |
| SE   | chr8  | Sorbs2        | + | 45775589-45775770:45785299-45785325:45789976-45790025              | 205 | 149 | 0.2683   | 0.502  | -0.234 | 0.234 | 9.64889E-05 | 0.001618 |
| SE   | chr8  | Tmc3          | + | 13313806-13313956:13314558-13314650:13318843-13318922              | 241 | 149 | 0.133    | 0.387  | -0.234 | 0.234 | 0.000313423 | 0.004433 |
| A3SS | chr5  | Aashd         | + | 76877527-76877688:76873659-76876678:76873859-76876422              | 298 | 149 | 0.4383   | 0.205  | 0.233  | 0.233 | 0.000549383 | 0.009439 |
| MXE  | chr5  | Zfp644        | - | 106619540-106619642:106635610-106638635:10666785-106668845:10669C  | 209 | 298 | 0.1687   | 0.4    | -0.233 | 0.233 | 0.000600615 | 0.00997  |
| SE   | chr12 | Rhan          | + | 109640267-109640328:109642665-109642652:109645262-109645331        | 236 | 149 | 0.99     | 0.7567 | 0.233  | 0.233 | 0           | 0        |
| SE   | chr4  | Ahrgef10l     | + | 140583824-140583932:140586784-140586900:140591832-140591987        | 265 | 149 | 0.7427   | 0.5097 | 0.233  | 0.233 | 2.55252E-05 | 0.000518 |
| SE   | chrX  | Gk            | + | 85701937-85704396:85706238-85706324:85711051-85711131              | 235 | 149 | 0.89     | 0.6573 | 0.233  | 0.233 | 6.65751E-05 | 0.001176 |
| SE   | chr5  | Rundc3b       | + | 8490336-8492589-8512267-8512407-8520859-8520110                    | 289 | 149 | 0.589    | 0.8223 | -0.233 | 0.233 | 0.00065755  | 0.000388 |
| SE   | chr19 | Trub1         | + | 57488073-57488212:57487174-57487321:57488009-57488051              | 296 | 149 | 1        | 0.767  | 0.233  | 0.233 | 3.08018E-08 | 1.34E-06 |
| SE   | chr8  | Ints10        | + | 68822157-68822250:68824190-68824267:6882777-68828643               | 226 | 149 | 0.3473   | 0.1143 | 0.233  | 0.233 | 4.72568E-06 | 0.000118 |
| A3SS | chr11 | Hdac5         | + | 102219145-102219281:102218416-102218781:102218416-102218487        | 149 | 149 | 0.8683   | 0.6363 | 0.232  | 0.232 | 2.87113E-05 | 0.000893 |
| A3SS | chr2  | Ranapob       | + | 158448320-158448449:158450177-158450310:158450189-158450310        | 160 | 149 | 0.3857   | 0.619  | 0.232  | 0.232 | 0.000324465 | 0.028651 |
| A5SS | chr12 | Adc11         | + | 88360514-88360595:88360514-88360783:8836385-88368480               | 298 | 149 | 0.5543   | 0.786  | -0.232 | 0.232 | 0.004270246 | 0.035406 |
| SE   | chr2  | Bcl2l1        | + | 128128620-128128756:128128620-128129014:128128925-128129014        | 298 | 149 | 0.8683   | 0.6367 | 0.232  | 0.232 | 0.00152162  | 0.009083 |
| SE   | chr4  | Nfib          | + | 82310303-82310391:82323572-82323710:82327729-82327913              | 287 | 149 | 0.3207   | 0.553  | -0.232 | 0.232 | 7.25801E-05 | 0.001268 |
| SE   | chr14 | Pnma2         | + | 66911110-66911293:66914307-66914764:66915322-66915450              | 298 | 149 | 0.507    | 0.385  | -0.232 | 0.232 | 3.7501E-05  | 0.000719 |
| SE   | chr16 | Tic3          | + | 94383912-94384066:94384346-94384388:94384784-94384934              | 191 | 149 | 0.5787   | 0.347  | 0.232  | 0.232 | 2.86882E-13 | 3.25E-11 |
| SE   | chr11 | B9d1          | + | 61506344-61506412:61509072-61509168:61509470-61509532              | 245 | 149 | 0.865    | 0.633  | 0.232  | 0.232 | 0.000334853 | 0.004687 |
| SE   | chr18 | Sl1           | + | 35438267-35438380:35467846-35467943:35498791-35499290              | 246 | 149 | 0.1157   | 0.3473 | -0.232 | 0.232 | 1.37218E-05 | 0.000302 |
| SE   | chr7  | Whamm         | + | 81586134-81586299:81588418-81588552:81589878-81589925              | 283 | 149 | 0.2927   | 0.525  | -0.232 | 0.232 | 0.000619306 | 0.007981 |
| SE   | chr7  | Pde3b         | + | 114519512-114519649:114521664-114521775:114523333-114524464        | 298 | 149 | 0.988    | 0.7663 | 0.232  | 0.232 | 1.10166E-09 | 6.53E-08 |
| A3SS | chr4  | Sfpq          | + | 127027397-127027518:127029827-127035854:127035808-127035854        | 298 | 149 | 0.855    | 0.6243 | 0.231  | 0.231 | 0           | 0        |
| MXE  | chr4  | Nfib          | + | 82290173-82296811:82310303-82310391:82320474-82320556:82323572-823 | 231 | 237 | 0.2423   | 0.473  | -0.231 | 0.231 | 0.004544429 | 0.048316 |
| RI   | chr6  | Traza         | + | 49252382-49252515:49252382-492523108:49252797-49253108             | 298 | 149 | 0.855    | 0.6247 | 0.231  | 0.231 | 8.0258E-13  | 3.86E-11 |
| SE   | chr14 | Dzfp1         | + | 118922911-118923167:118923977-118924095:118924425-118924518        | 298 | 149 | 0.8503   | 0.6197 | 0.231  | 0.231 | 6.78294E-11 | 4.97E-09 |
| SE   | chr13 | 4833439L19Rik | + | 54559198-54559324:54564185-54564272:54565182-54565375              | 236 | 149 | 0.4927   | 0.7233 | -0.231 | 0.231 | 0.000262603 | 0.026983 |
| A3SS | chr11 | Can1          | + | 118418930-118419118:118417574-118417806:118417574-118417654        | 298 | 149 | 0.538    | 0.7683 | 0.23   | 0.23  | 1.59158E-05 | 0.000547 |
| A5SS | chr9  | Prkcsb        | + | 22011438-22011575:220111438-22011596:22011674-22011170             | 169 | 149 | 0.5973   | 0.3673 | 0.23   | 0.23  | 1.81049E-05 | 0.000431 |
| A5SS | chr7  | Ccdc9         | + | 16275280-16275375:16275256-16275375:16274042-16274416              | 172 | 149 | 0.761    | 0.5313 | 0.23   | 0.23  | 0.000150565 | 0.002476 |
| MXE  | chr3  | Gria2         | + | 80682904-80689351:80690404-80690518:80691320-80691743:80692285-806 | 298 | 263 | 0.1453   | 0.3723 | 0.23   | 0.23  | 0           | 0        |
| MXE  | chr14 | Camk2g        | + | 20744604-20744648:20747819-20747851:20755659-20755702:20760144-207 | 192 | 181 | 0.6477   | 0.8773 | -0.23  | 0.23  | 4.21885E-15 | 1.27E-12 |
| MXE  | chr11 | Adams2        | + | 50667991-50668150:50737166-50737368:50756696-50756779:50773217-507 | 298 | 232 | 0.6137   | 0.384  | 0.23   | 0.23  | 0.003494271 | 0.039764 |
| RI   | chr12 | LOC108167368  | + | 20664495-20664888:20664495-20665076:20665021-20665076              | 280 | 149 | 0.906    | 0.6783 | 0.23   | 0.23  | 0.000128681 | 0.001067 |
| RI   | chr1  | Sf3b1         | + | 55014869-55016182:55014869-55016490:55016376-55016490              | 298 | 149 | 0.838    | 0.6063 | 0.23   | 0.23  | 0           | 0        |
| SE   | chr8  | Cdk10         | + | 123229112-123229181:123230268-123230375:123230594-123230684        | 256 | 149 | 0.943    | 0.713  | 0.23   | 0.23  | 2.4098E-08  | 6.64E-07 |
| SE   | chr7  | 2410002F23Rik | + | 44246732-44246808:44247238-44247416:44248252-44248295              | 298 | 149 | 0.4967   | 0.2663 | 0.232  | 0.232 | 1.17581E-05 | 0.000469 |
| SE   | chr1  | Map2          | + | 66401444-66401521:66416735-66416866:66420138-66420196              | 283 | 149 | 0.6527   | 0.8823 | 0.23   | 0.23  | 1.46411E-08 | 6.87E-07 |
| SE   | chr9  | Srx19         | + | 30440096-30440225:30462231-30462415:30463220-30463307              | 298 | 149 | 0.7053   | 0.4657 | 0.233  | 0.233 | 0.000262603 | 0.026983 |
| SE   | chr13 | Gppb1         | + | 111440632-111440816:111447896-111447955:111448933-111448999        | 298 | 149 | 0.6973   | 0.467  | 0.23   | 0.23  | 9.99201E-16 | 1.59E-13 |
| SE   | chr1  | Glb1          | + | 75208319-75208379:75208887-75208837:75209056-75209222              | 298 | 149 | 0.8623   | 0.6327 | 0.23   | 0.23  | 0.001186267 | 0.013791 |
| SE   | chr7  | Calv          | + | 140073941-140074100:140081393-140081538:140082093-140082387        | 194 | 149 | 0.2383   | 0.6988 | -0.223 | 0.223 | 5.3016E-05  | 0.000972 |
| A3SS | chr19 | Ccn3          | + | 40844660-40844959:40845045-40845204:40845204-40845204              | 281 | 149 | 0.923    | 0.49   |        |       |             |          |

|      |       |               |   |                                                                    |     |     |        |        |        |       |             |          |
|------|-------|---------------|---|--------------------------------------------------------------------|-----|-----|--------|--------|--------|-------|-------------|----------|
| MXE  | chr16 | Anks3         | - | 4953819-4953954-4955858-4955939-4960397-4960568-4964120-4964203    | 298 | 230 | 0.5367 | 0.3123 | 0.224  | 0.224 | 1.01022E-06 | 4.45E-05 |
| MXE  | chr5  | Mphosph9      | - | 124315373-124315896-124316082-124316115-124320045-124320954-124324 | 258 | 238 | 0.6267 | 0.851  | -0.224 | 0.224 | 0.000997149 | 0.014948 |
| MXE  | chr8  | Rbm34         | - | 126953366-126953449-126959542-126959585-126961126-126961971-126962 | 208 | 192 | 0.254  | 0.03   | 0.224  | 0.224 | 2.50555E-12 | 4.72E-10 |
| RI   | chr2  | Kcnb1         | - | 167095969-167099860-167095969-167100815-167100728-167100815        | 298 | 149 | 0.8407 | 0.617  | 0.224  | 0.224 | 2.6699E-05  | 0.000274 |
| SE   | chr14 | Tdrd3         | + | 87457034-87457118-87458757-87458822-87472076-87472236              | 214 | 149 | 0.981  | 0.757  | 0.224  | 0.224 | 5.55112E-16 | 9.03E-14 |
| SE   | chrX  | Drp2          | + | 134446628-134446693-134446962-134447027-134447488-134447991        | 214 | 149 | 0.9877 | 0.7637 | 0.224  | 0.224 | 5.55112E-16 | 9.03E-14 |
| SE   | chr3  | Pik4          | + | 40810662-40810764-40811234-40811383-40811880-40812013              | 298 | 149 | 0.9137 | 0.6897 | 0.224  | 0.224 | 0.000355334 | 0.004937 |
| SE   | chr11 | Rpain         | + | 70973015-70973075-70973802-70973913-70974069-70974132              | 260 | 149 | 0.914  | 0.6897 | 0.224  | 0.224 | 2.07969E-07 | 4.74E-06 |
| SE   | chr17 | Abcc10        | - | 46306957-46307300-46310038-46310233-46310377-46310530              | 298 | 149 | 0.7297 | 0.5954 | -0.224 | 0.224 | 6.37301E-05 | 0.000708 |
| SE   | chr2  | Slc4a10       | + | 62243362-62243453-62244432-62244441-62250379-62250536              | 238 | 149 | 0.5257 | 0.303  | -0.224 | 0.224 | 0.000188122 | 0.00287  |
| SE   | chr6  | Luc7l2        | + | 38551334-38551908-38554980-38555063-38570510-38570604              | 232 | 149 | 0.1657 | 0.019  | -0.224 | 0.224 | 1.74347E-11 | 1.44E-09 |
| SE   | chr7  | Edrf1         | + | 133643993-133644149-133646990-133647091-133647345-133647466        | 290 | 149 | 0.4123 | 0.1867 | 0.224  | 0.224 | 0.000194526 | 0.002954 |
| SE   | chr6  | Pex26         | + | 121185710-121185850-121187259-121187566-121190101-121190247        | 258 | 149 | 0.9803 | 0.7566 | -0.224 | 0.224 | 2.95176E-10 | 1.94E-08 |
| A5SS | chr13 | Lgals8        | - | 12461427-12461738-12461241-12461738-12459174-12459316              | 298 | 149 | 0.1557 | 0.3783 | -0.223 | 0.223 | 0.000147854 | 0.002439 |
| A5SS | chr7  | Tial1         | - | 128448121-128448208-128446731-128448208-128446195-128446270        | 298 | 149 | 0.5357 | 0.2847 | -0.223 | 0.223 | 7.33628E-07 | 2.99E-05 |
| MXE  | chr8  | Polb          | - | 22647413-22647471-22648182-22648256-22648305-22648324-22650489-226 | 168 | 223 | 0.0737 | 0.2963 | -0.223 | 0.223 | 0           | 0        |
| SE   | chrX  | Rbmx          | - | 57385133-57385221-57386114-57387393-57388061-57388143              | 298 | 149 | 0.6307 | 0.4073 | 0.223  | 0.223 | 0           | 0        |
| SE   | chr16 | Pdm15         | - | 97816849-97817045-97818212-97818341-97821768-97822010              | 278 | 149 | 1      | 0.7767 | 0.223  | 0.223 | 1.94241E-08 | 7E-07    |
| SE   | chr4  | Kih17         | - | 156230505-156230686-156230901-156230974-156231078-156231173        | 222 | 149 | 0.9163 | 0.6933 | 0.223  | 0.223 | 8.91329E-08 | 3.47E-06 |
| SE   | chr10 | Spp2b         | + | 80863455-80863551-80864072-80864154-80865121-80865220              | 231 | 149 | 0.7603 | 0.5377 | 0.223  | 0.223 | 0.000125938 | 0.00203  |
| SE   | chr17 | 110052M02Rik  | + | 161522627-16152345-161556179-161556332-16157519-16157611           | 298 | 149 | 0.6827 | 0.4593 | 0.223  | 0.223 | 0.001284789 | 0.014783 |
| MXE  | chr5  | Lvar          | + | 38220504-38220635-38222931-38223054-38223134-38223237-38224627-382 | 272 | 242 | 0.192  | 0.4137 | -0.222 | 0.222 | 0.003369175 | 0.038632 |
| RI   | chr7  | Zfp939        | + | 39472858-39474439-39472858-39477427-39477311-39477427              | 298 | 149 | 0.9093 | 0.6877 | -0.222 | 0.222 | 0.000510681 | 0.003512 |
| RI   | chr8  | Ikbk          | - | 22659205-22660459-22659205-22661492-22661402-22661492              | 298 | 149 | 0.5583 | 0.3367 | 0.222  | 0.222 | 3.99543E-07 | 6.77E-06 |
| RI   | chr1  | Hlurp         | - | 86263109-86266280-86263109-86266658-86266332-86266658              | 199 | 149 | 0.731  | 0.509  | 0.222  | 0.222 | 0.002392683 | 0.012991 |
| RI   | chr11 | Baiap2        | + | 12003038-12003085-12003038-12006782-12006782-12006782              | 298 | 149 | 0.9547 | 0.7323 | 0.222  | 0.222 | 3.2947E-05  | 0.00038  |
| RI   | chr5  | Tmem33        | + | 67286096-67286216-67286096-67291461-67287010-67291461              | 298 | 149 | 0.8393 | 0.6163 | 0.222  | 0.222 | 2.81131E-12 | 1.23E-10 |
| SE   | chr3  | Rmad1         | + | 87927055-87927117-87927563-87927715-87927924-87928048              | 298 | 149 | 0.9543 | 0.732  | 0.222  | 0.222 | 4.08988E-08 | 1.72E-06 |
| SE   | chr4  | Fang3         | - | 43004559-43004605-43004744-43005008-43005211-43005277              | 298 | 149 | 1      | 0.7777 | 0.222  | 0.222 | 5.18966E-08 | 2.14E-06 |
| SE   | chr6  | Cecr5         | - | 120509494-120510462-120510631-120510819-12051398-120514572         | 298 | 149 | 0.9887 | 0.767  | 0.222  | 0.222 | 3.68372E-13 | 4.09E-11 |
| SE   | chr1  | Dusp12        | + | 170880130-170880226-170880573-170880691-170880915-170881028        | 267 | 149 | 0.885  | 0.663  | 0.222  | 0.222 | 2.03418E-07 | 7.34E-06 |
| SE   | chr18 | Bin1          | + | 33242970-332429723-332430750-332430857-332431671-332431742         | 258 | 149 | 0.776  | 0.0543 | 0.222  | 0.222 | 0           | 0        |
| SE   | chr2  | Opi1          | + | 181715690-181715946-181717996-181718093-181718377-181718732        | 246 | 149 | 0.1697 | 0.392  | -0.222 | 0.222 | 1.7873E-09  | 1.02E-07 |
| SE   | chr8  | C30057M02Rik  | - | 122729771-122729894-122734088-122738893-122752114-122752649        | 298 | 149 | 0.0543 | 0.276  | -0.222 | 0.222 | 6.20559E-12 | 5.55E-10 |
| SE   | chr3  | Arnt          | + | 95460377-95460421-95466793-95466837-95470177-95470390              | 293 | 149 | 0.552  | 0.3303 | 0.222  | 0.222 | 0.000388973 | 0.005328 |
| SE   | chr15 | Zfp385a       | + | 103313895-103315225-103315361-103315456-103315627-103315796        | 144 | 149 | 0.9747 | 0.7523 | 0.222  | 0.222 | 0.00020017  | 0.001576 |
| SE   | chr12 | Tmed8         | - | 87174541-87174667-87176634-87176803-87181389-87181473              | 298 | 149 | 0.9157 | 0.6933 | 0.222  | 0.222 | 0.00024229  | 0.003564 |
| SE   | chr3  | Ppp3c4        | + | 136928522-136928619-136932011-136932040-136935029-136937725        | 178 | 149 | 0.5227 | 0.3003 | 0.222  | 0.222 | 0           | 0        |
| SE   | chrX  | Atp11c        | - | 60223283-60225793-60229923-60230013-60236557-60236710              | 139 | 149 | 0.9667 | 0.7447 | 0.222  | 0.222 | 1.66146E-06 | 4.75E-05 |
| A3SS | chr2  | Ceil2         | - | 6560659-6560790-6553785-6553982-6553785-6553984                    | 266 | 149 | 0.353  | 0.132  | 0.221  | 0.221 | 1.14218E-06 | 5.61E-05 |
| MXE  | chr10 | Ank3          | + | 69980272-69980394-69982116-69982161-69986083-69993762-69994372-699 | 194 | 298 | 0.1383 | 0.3593 | -0.221 | 0.221 | 3.69562E-09 | 3.17E-07 |
| MXE  | chr12 | Mapk4         | + | 69816290-69816393-69818022-69818080-69818384-69818498-69822803-698 | 263 | 207 | 0.0963 | 0.3187 | -0.221 | 0.221 | 1.0421E-07  | 8.3E-06  |
| MXE  | chr11 | Hnmp11        | + | 50379821-50379964-50382573-50382715-50382800-50382871-50382949-503 | 298 | 220 | 0.5377 | 0.759  | -0.221 | 0.221 | 1.30055E-07 | 7.78E-06 |
| MXE  | chr3  | Cankm2d       | + | 126767514-126767579-126770785-126770857-126771474-126771846-12678  | 291 | 221 | 0.9617 | 0.2407 | -0.221 | 0.221 | 4.32987E-15 | 1.27E-12 |
| RI   | chr17 | Anks1         | + | 28059294-28059391-28059294-28062775-28060562-28062775              | 298 | 149 | 0.677  | 0.4563 | 0.221  | 0.221 | 2.35098E-06 | 3.34E-05 |
| SE   | chr12 | Inf2          | + | 112611410-112612036-112612548-112612604-112614895-112615557        | 205 | 149 | 0.029  | 0.256  | -0.221 | 0.221 | 2.14361E-10 | 1.44E-08 |
| SE   | chr2  | Grb14         | + | 64912476-64912853-64914716-64914809-64916829-64916916              | 242 | 149 | 0.99   | 0.7693 | 0.221  | 0.221 | 7.70495E-14 | 9.53E-12 |
| SE   | chr2  | Kcnt1         | + | 25898696-25898835-25900223-25900286-25900372-25900480              | 212 | 149 | 0.9407 | 0.7193 | 0.221  | 0.221 | 8.1397E-07  | 2.55E-05 |
| SE   | chr2  | Cstf3         | + | 104660519-104660714-104663294-104663447-104664069-104664163        | 298 | 149 | 0.9883 | 0.7677 | 0.221  | 0.221 | 2.22045E-16 | 3.82E-14 |
| SE   | chr11 | Rnf157        | - | 116336353-116338830-116340338-116340378-116345907-116345955        | 189 | 149 | 0.9353 | 0.7147 | 0.221  | 0.221 | 0.00058686  | 0.008401 |
| SE   | chr12 | Siva1         | + | 112644828-112645084-112646838-112647032-112647825-112647981        | 298 | 149 | 0.889  | 0.668  | 0.221  | 0.221 | 5.71453E-11 | 4.26E-09 |
| A3SS | chr2  | Serp1         | + | 67271887-67272027-67272819-67272938-67272864-67272938              | 193 | 149 | 0.9947 | 0.2743 | 0.222  | 0.222 | 0           | 0        |
| A3SS | chr4  | Pank4         | + | 154978393-154978442-154978921-154979025-154979855-154979025        | 182 | 149 | 0.5817 | 0.362  | 0.222  | 0.222 | 1.9619E-06  | 8.85E-05 |
| A3SS | chr7  | Tlyh1         | + | 4133663-4133738-4133866-4135407-4134351-4135407                    | 298 | 149 | 0.7503 | 0.532  | 0.222  | 0.222 | 7.36311E-12 | 1.33E-09 |
| A5SS | chr7  | Pcf11         | + | 92659798-92659888-92659405-92659888-92657308-92658866              | 298 | 149 | 0.2863 | 0.5067 | -0.222 | 0.222 | 2.07093E-06 | 7.15E-05 |
| A5SS | chr16 | Nxpe3         | - | 55895288-55896773-55894928-55896773-55890582-55890581              | 298 | 149 | 0.018  | 0.2377 | -0.222 | 0.222 | 2.19208E-09 | 1.87E-07 |
| RI   | chr8  | Hpf1          | + | 60905548-60906438-60905548-60907580-60907337-60907580              | 298 | 149 | 0.817  | 0.597  | 0.222  | 0.222 | 0.00059632  | 0.003512 |
| RI   | chr8  | Purq          | + | 33386330-33387208-33386330-33389495-33389169-33389495              | 298 | 149 | 0.8023 | 0.5823 | 0.222  | 0.222 | 0.00020017  | 0.001576 |
| SE   | chr1  | Ikap          | + | 91390607-91390663-91391109-91391197-91398651-91398693              | 237 | 149 | 0.915  | 0.6953 | 0.222  | 0.222 | 5.35625E-11 | 4.03E-09 |
| SE   | chr4  | Rcc1          | - | 132337731-132337910-132338051-132338238-132339925-132340006        | 298 | 149 | 0.943  | 0.7233 | 0.222  | 0.222 | 1.43765E-09 | 8.35E-08 |
| SE   | chr7  | Zland6        | + | 84632439-84634409-84642286-84642437-84652882-84653042              | 298 | 149 | 0.11   | 0.3297 | -0.222 | 0.222 | 8.67607E-08 | 3.38E-06 |
| SE   | chr12 | Eimd5         | - | 98819861-98819869-98821600-98821614-98824634-98824760              | 163 | 149 | 1      | 0.7797 | -0.222 | 0.222 | 1.84667E-10 | 1.25E-08 |
| SE   | chr9  | Fam214a       | + | 75018997-75019155-75023585-75023653-75025851-75025847              | 217 | 149 | 1      | 0.7797 | 0.222  | 0.222 | 1.16751E-12 | 1.2E-10  |
| SE   | chr3  | Pht1          | + | 103985753-103985909-103988615-103988774-103991074-103991211        | 298 | 149 | 0.924  | 0.7037 | 0.222  | 0.222 | 0.000157936 | 0.002463 |
| SE   | chr7  | Zfp788        | + | 41632733-41633694-41634333-41634342-41647483-41647617              | 248 | 149 | 0.4773 | 0.257  | 0.222  | 0.222 | 0.003391956 | 0.024875 |
| SE   | chr9  | Zfp266        | + | 20505977-20506065-20506728-20506882-20508019-20508185              | 298 | 149 | 0.9217 | 0.7017 | 0.222  | 0.222 | 1.51346E-12 | 1.54E-10 |
| SE   | chr17 | 1110052M02Rik | + | 21651803-21652345-21656206-21656332-21657519-21657611              | 275 | 149 | 0.6757 | 0.4566 | 0.222  | 0.222 | 0.001994005 | 0.021314 |
| SE   | chr11 | Sh3pdx2b      | + | 32407562-32407666-32408968-32409051-32411457-32411574              | 232 | 149 | 0.597  | 0.3773 | 0.222  | 0.222 | 7.76266E-05 | 0.001944 |
| A5SS | chr11 | Med1          | + | 98158329-98158469-98155177-98158468-98152154-98154906              | 298 | 149 | 0.9823 | 0.7633 | 0.219  | 0.219 | 3.47565E-08 | 2.17E-06 |
| A5SS | chr10 | Chp1          | + | 89475426-89475536-89475333-89475358-89472913-89472984              | 241 | 149 |        |        |        |       |             |          |

|      |       |               |   |                                                                     |     |     |        |        |        |       |             |          |
|------|-------|---------------|---|---------------------------------------------------------------------|-----|-----|--------|--------|--------|-------|-------------|----------|
| SE   | chr2  | Elmo2         | - | 165301941-165301991;165303666-165303701;165304900-165304978         | 184 | 149 | 0.4623 | 0.2463 | 0.216  | 0.216 | 4.58051E-09 | 2.46E-07 |
| SE   | chr17 | Fez2          | - | 7838474-78384819;78386991-78387071;78400630-78400898                | 229 | 149 | 0.6767 | 0.461  | 0.216  | 0.216 | 3.29041E-07 | 1.13E-05 |
| SE   | chr9  | MHfsl         | - | 88688605-88688895;88694260-88694332;88715488-88715749               | 221 | 149 | 0.0823 | 0.298  | -0.216 | 0.216 | 2.1328E-06  | 5.92E-05 |
| A5SS | chr14 | Dca11         | + | 55560441-55560627;55560441-55560818;55561210-55561442               | 298 | 149 | 0.6593 | 0.444  | 0.215  | 0.215 | 0.000474155 | 0.006271 |
| MXE  | chr17 | Nrxn1         | - | 90162114-90162433;90163792-90163881;90208320-90208494;903622760-903 | 298 | 238 | 0.8773 | 0.662  | 0.215  | 0.215 | 0           | 0        |
| MXE  | chr1  | Slau2         | - | 16463035-16463194;16486020-16486150;16491241-16491394;16509342-165  | 298 | 279 | 0.1537 | 0.369  | -0.215 | 0.215 | 1.54992E-08 | 1.16E-06 |
| RI   | chr18 | Brd8          | - | 34599826-34600241;34599826-34602247;34602203-34602247               | 298 | 149 | 0.4497 | 0.2347 | 0.215  | 0.215 | 6.9178E-13  | 3.46E-11 |
| SE   | chr18 | Apc           | + | 34261068-34261157;34266058-34266222;34266298-34268379               | 298 | 149 | 0.7757 | 0.5603 | 0.215  | 0.215 | 6.91955E-08 | 2.77E-06 |
| SE   | chr2  | Mtq2          | + | 180083345-180083460;180084451-180084589;180085380-180085902         | 287 | 149 | 0.9887 | 0.7737 | 0.215  | 0.215 | 5.22466E-08 | 2.15E-06 |
| SE   | chr2  | Lrrc4c        | + | 97464684-97468420;97522122-97522199;97603489-97603540               | 226 | 149 | 0.0547 | 0.2697 | -0.215 | 0.215 | 1.81645E-11 | 1.49E-09 |
| SE   | chr7  | Dmwd          | + | 19078055-19078237;19081919-19081993;19082276-19082775               | 223 | 149 | 0.9683 | 0.753  | 0.215  | 0.215 | 7.28117E-09 | 3.69E-07 |
| SE   | chr4  | Tmem57        | - | 134833198-134833321;134836767-134837034;134837849-134837990         | 298 | 149 | 0.3393 | 0.1247 | 0.215  | 0.215 | 0.002311147 | 0.024168 |
| A3SS | chr17 | PHf10         | - | 14946655-14946763;14945001-14946387;14945001-14945184               | 298 | 149 | 0.9967 | 0.7827 | 0.214  | 0.214 | 0           | 0        |
| MXE  | chrX  | Dlg3          | + | 100807180-100807255;100809862-100809907;100811502-100811543;100812  | 194 | 190 | 0.7797 | 0.5657 | 0.214  | 0.214 | 2.83873E-07 | 1.56E-05 |
| SE   | chr2  | Tpd52i2       | + | 181508166-181508267;181510504-181510530;181511574-181511615         | 175 | 149 | 0.5563 | 0.2423 | 0.214  | 0.214 | 1.00212E-08 | 4.9E-07  |
| SE   | chr14 | Ogdh1         | + | 32322012-32322116;32323879-32323947;32325794-32325998               | 217 | 149 | 0.5893 | 0.375  | 0.214  | 0.214 | 0.00292958  | 0.030065 |
| SE   | chr12 | Fam49a        | + | 12262133-12262238;12276343-12276415;12295616-12295688               | 221 | 149 | 0.3083 | 0.5227 | -0.214 | 0.214 | 0.000404929 | 0.005619 |
| SE   | chr2  | Dtnb          | + | 3772587-3772746;3773551-3773640;3774570-3774810                     | 238 | 149 | 0.238  | 0.452  | -0.214 | 0.214 | 0.001278107 | 0.014716 |
| SE   | chr7  | Tenn4         | + | 96882333-96882582;96854717-96854737;96863450-96863682               | 169 | 149 | 0.9543 | 0.74   | 0.214  | 0.214 | 4.83052E-07 | 1.59E-05 |
| A5SS | chr17 | Wdr4          | + | 31509821-31509912;31509769-31509912;31503510-31503666               | 200 | 149 | 0.8517 | 0.6383 | 0.213  | 0.213 | 6.29245E-07 | 2.62E-05 |
| RI   | chr8  | Cers4         | + | 4520216-4520308;4520216-4520682;4520564-4520682                     | 298 | 149 | 0.5277 | 0.315  | 0.213  | 0.213 | 3.21951E-06 | 4.38E-05 |
| SE   | chr7  | Chrn7a        | - | 63103780-63103889;63104978-63105064;63106004-63106198               | 235 | 149 | 1      | 0.7867 | 0.213  | 0.213 | 5.47086E-10 | 3.45E-08 |
| SE   | chr4  | Ptprd         | - | 76099412-76099605;76100447-76100752;76102955-76103099               | 298 | 149 | 0.7247 | 0.5113 | 0.213  | 0.213 | 0.003267041 | 0.032366 |
| SE   | chr2  | Caacn1b       | - | 24861754-24861880;24870073-24870156;24877822-24878039               | 232 | 149 | 0.0903 | 0.3037 | -0.213 | 0.213 | 1.5343E-09  | 8.85E-08 |
| SE   | chr5  | Glt2          | - | 114752279-114753287;114753148-114753153;114753279-114753324         | 154 | 149 | 0.792  | 0.579  | 0.213  | 0.213 | 0.030398979 | 0.030956 |
| SE   | chr5  | Epf1          | + | 30247463-30247531;30249412-30249530;30256978-30256980               | 257 | 149 | 1      | 0.787  | 0.213  | 0.213 | 1.84704E-11 | 1.52E-09 |
| SE   | chr10 | Anks1b        | + | 90895099-90895206;90897247-90897428;90814696-90814767               | 298 | 149 | 0.974  | 0.7613 | 0.213  | 0.213 | 7.90569E-12 | 6.91E-10 |
| SE   | chr11 | Slc43a2       | + | 75563562-75563708;75566404-75566415;75566979-75567117               | 160 | 149 | 0.7247 | 0.5113 | 0.213  | 0.213 | 0.004266595 | 0.004443 |
| SE   | chr1  | Dca6          | + | 172186296-172186388;172186855-172186912;172187353-172187480         | 206 | 149 | 0.9847 | 0.7717 | 0.213  | 0.213 | 0           | 0        |
| SE   | chr11 | Rps8kb1       | - | 86535411-86535460;86543931-86544045;86544566-86544765               | 263 | 149 | 0.3843 | 0.5927 | -0.213 | 0.213 | 1.20035E-07 | 4.56E-06 |
| A3SS | chr4  | Mier1         | + | 103115560-103115660;103118239-103118315;103118242-103118315         | 151 | 149 | 0.6997 | 0.4873 | 0.212  | 0.212 | 0.002149861 | 0.02698  |
| MXE  | chr8  | Rbm34         | - | 126959542-126959585;126965382-126965622;126969833-126970128;12697C  | 294 | 298 | 0.8297 | 0.6173 | 0.212  | 0.212 | 7.45896E-09 | 5.89E-07 |
| MXE  | chr7  | Dlg2          | + | 92386915-92386990;92417224-92417323;92418088-92418133;92427691-924  | 248 | 194 | 0.4553 | 0.2433 | 0.212  | 0.212 | 1.15476E-06 | 4.96E-05 |
| SE   | chr15 | Fam91a1       | + | 58441578-58441726;58442322-58442968;58443161-58443243               | 283 | 149 | 0.9803 | 0.768  | 0.212  | 0.212 | 0           | 0        |
| SE   | chr2  | Ppia          | + | 69722819-69722957;69731746-69731813;69732197-69732274               | 216 | 149 | 0.9357 | 0.7233 | 0.212  | 0.212 | 1.38209E-11 | 1.16E-09 |
| SE   | chr7  | Emsy          | + | 98587130-98590884;98593331-98593310;98594752-98595312               | 298 | 149 | 0.8133 | 0.6013 | 0.212  | 0.212 | 2.72166E-06 | 7.3E-05  |
| SE   | chr1  | Caacn1e       | - | 154486498-154486707;154488044-154488133;154488785-154488838         | 238 | 149 | 0.5303 | 0.3187 | 0.212  | 0.212 | 0.001163734 | 0.01357  |
| SE   | chr2  | 4930402H24Rik | - | 130777205-130777281;130778417-130778504;130784424-130784460         | 236 | 149 | 0.977  | 0.7653 | 0.212  | 0.212 | 1.58544E-11 | 1.32E-09 |
| SE   | chr11 | Fdxr          | - | 115269897-115269896;115270015-115270099;115270323-115270340         | 173 | 149 | 0.5557 | 0.3437 | 0.212  | 0.212 | 0.00013035  | 0.002087 |
| A3SS | chr19 | Smc5          | - | 23218405-23218530;23215155-23215225;23215155-23215199               | 234 | 149 | 0.3397 | 0.1283 | 0.211  | 0.211 | 0.003634213 | 0.03995  |
| A3SS | chr11 | Pus10         | + | 23706885-23706946;23707361-23707568;23707523-23707568               | 249 | 149 | 0.2697 | 0.1087 | 0.211  | 0.211 | 9.80001E-08 | 7.44E-06 |
| A5SS | chr10 | Ankr2d4       | + | 81635688-81635752;81635688-81635857;81636639-81636426               | 253 | 149 | 0.3346 | 0.1233 | 0.211  | 0.211 | 0.08327E-05 | 0.000277 |
| MXE  | chrX  | Pdzd4         | + | 73793676-73796477;73796830-73796892;73798194-73798292;73799834-738  | 247 | 211 | 0.0407 | 0.252  | -0.211 | 0.211 | 0           | 0        |
| RI   | chr13 | 201111101Rik  | + | 63298712-63298856;63298712-63298777;63301779-63302877               | 298 | 149 | 0.7916 | 0.585  | 0.211  | 0.211 | 0.0002978   | 0.002205 |
| SE   | chr4  | Cpne3         | - | 19536527-19536625;19539152-19539180;19540741-19540830               | 177 | 149 | 0.2843 | 0.073  | 0.211  | 0.211 | 2.28062E-05 | 0.00047  |
| SE   | chr18 | Myo5b         | + | 74713548-74713632;74714826-74714959;74715959-74716078               | 282 | 149 | 0.982  | 0.771  | 0.211  | 0.211 | 1.14848E-07 | 4.39E-06 |
| SE   | chr11 | Kat7          | - | 95271853-95275887;95276443-95276549;95277469-95277615               | 255 | 149 | 0.8283 | 0.617  | 0.211  | 0.211 | 1.57294E-07 | 5.81E-06 |
| SE   | chr4  | Camt1a        | - | 151586415-151586482;151792419-151792502;151830418-151830536         | 232 | 149 | 0.6223 | 0.863  | -0.211 | 0.211 | 3.02371E-06 | 7.97E-05 |
| SE   | chr9  | Caacn2d3      | + | 107518193-107518269;107519179-107519199;107522123-107522183         | 169 | 149 | 0.3883 | 0.1777 | 0.211  | 0.211 | 9.64746E-05 | 0.001618 |
| SE   | chr7  | Ankr2d7       | + | 35591752-35591882;35600315-35600425;35602428-35602582               | 259 | 149 | 0.8747 | 0.6633 | 0.211  | 0.211 | 0.003543116 | 0.034655 |
| SE   | chr11 | Slc38a10      | - | 120140593-120140686;120141600-120141645;120150980-120151063         | 215 | 149 | 0.8617 | 0.6503 | 0.211  | 0.211 | 5.84892E-07 | 1.9E-05  |
| SE   | chr7  | Zfp787        | - | 6131489-613171;6134642-6134708;6143062-6143151                      | 194 | 149 | 0.0753 | 0.2867 | -0.211 | 0.211 | 6.3558E-11  | 4.7E-09  |
| A3SS | chr3  | Gria2         | - | 80692285-80692532;80691320-80691743;80691320-80691434               | 298 | 149 | 0.4563 | 0.2463 | 0.21   | 0.21  | 0           | 0        |
| MXE  | chr14 | Appl1         | - | 26958453-26958511;26959425-26959466;26960951-26961038;26962806-269  | 236 | 190 | 0.7063 | 0.496  | 0.21   | 0.21  | 2.56155E-05 | 0.00072  |
| MXE  | chr4  | S13gal3       | - | 118031840-118031882;118054600-118054697;118075419-11807693;118134   | 293 | 196 | 0.916  | 0.7057 | 0.21   | 0.21  | 6.18901E-07 | 3.05E-05 |
| RI   | chr15 | Kifc2         | + | 76662595-76662896;76662595-76663083;76662974-76663083               | 225 | 149 | 0.073  | 0.2827 | -0.21  | 0.21  | 5.9952E-15  | 3.66E-13 |
| SE   | chr6  | Tulp3         | - | 128324985-128325078;128325424-128325520;128325877-128325991         | 145 | 149 | 0.3237 | 0.534  | -0.21  | 0.21  | 0.000455061 | 0.006117 |
| SE   | chr5  | Srm3          | + | 135857038-135857215;135859282-135859299;135867127-135867146         | 266 | 149 | 0      | 0.21   | -0.21  | 0.21  | 1.26666E-07 | 4.79E-06 |
| SE   | chr1  | Cspp1         | + | 10083501-10083558;10085477-10085952;10088051-10088184               | 298 | 149 | 0.286  | 0.4937 | -0.21  | 0.21  | 0.000467399 | 0.00625  |
| SE   | chr14 | Pinx1         | + | 63878112-63878188;63892723-63892833;63919097-63919855               | 259 | 149 | 0.064  | 0.2757 | -0.21  | 0.21  | 2.56171E-07 | 9E-06    |
| A3SS | chr14 | Bmp1          | - | 70490020-70490200;70486147-70486930;70486147-70486272               | 298 | 149 | 0.195  | 0.404  | -0.209 | 0.209 | 5.93466E-08 | 4.87E-06 |
| A5SS | chr19 | Cbw1d         | - | 24961384-24961616;24961171-24961616;24961594-24967990               | 215 | 149 | 0.634  | 0.425  | 0.209  | 0.209 | 0.000368011 | 0.005119 |
| SE   | chr7  | Shank1        | + | 44343658-44343738;44344298-44344321;44344506-44344574               | 172 | 149 | 0.815  | 0.6057 | 0.209  | 0.209 | 6.23999E-11 | 4.66E-09 |
| SE   | chr2  | Fmm12         | + | 53128653-53128976;53128717-53128842;53130412-53130497               | 274 | 149 | 0.9223 | 0.713  | 0.209  | 0.209 | 2.28264E-07 | 8.13E-06 |
| SE   | chr1  | Pam           | + | 97821091-97821988;97822936-97822989;97825837-97826037               | 202 | 149 | 0.9897 | 0.781  | 0.209  | 0.209 | 0           | 0        |
| SE   | chr2  | Metap1d       | + | 71512126-71512168;71515637-71515680;71523802-71523849               | 298 | 149 | 0.991  | 0.7823 | 0.209  | 0.209 | 1.62205E-11 | 1.34E-09 |
| SE   | chr12 | Rnaseh1       | + | 28655585-28655644;28657272-28657326;28657363-28657717               | 203 | 149 | 0.987  | 0.7783 | 0.209  | 0.209 | 3.42193E-08 | 1.48E-06 |
| SE   | chr2  | Ubr1          | - | 120893068-120893216;120895072-120895162;120896496-120896593         | 239 | 149 | 0.9327 | 0.7237 | 0.209  | 0.209 | 0.000749326 | 0.009369 |
| SE   | chr8  | Ucn13a        | + | 71639538-71639567;71637772-71637927;71639217-71639222               | 298 | 149 | 1      | 0.7913 | 0.209  | 0.209 | 2.34638E-07 | 8.32E-06 |
| SE   | chr5  | Ept1          | + | 30247463-30247531;30252710-30252784;30256978-30256980               | 223 | 149 | 1      | 0.7907 | 0.209  | 0.209 | 2.95994E-11 | 2.35E-09 |
|      |       |               |   |                                                                     |     |     |        |        |        |       |             |          |

|      |       |               |   |                                                                    |     |     |        |        |        |       |             |          |
|------|-------|---------------|---|--------------------------------------------------------------------|-----|-----|--------|--------|--------|-------|-------------|----------|
| SE   | chr6  | Casd1         | + | 4631519-4631598-4634002-4634103-4635746-4635886                    | 250 | 149 | 0.9587 | 0.7537 | 0.205  | 0.205 | 4.88665E-12 | 4.43E-10 |
| SE   | chr1  | Kif1a         | - | 93025621-93025735-93026832-93026855-9303454-93034572               | 172 | 149 | 0.5413 | 0.3367 | 0.205  | 0.205 | 0.00187376  | 0.020192 |
| SE   | chr11 | Hdac5         | - | 102218416-102218487-102221768-102221851-102224134-102224955        | 232 | 149 | 0.0053 | 0.21   | -0.205 | 0.205 | 0           | 0        |
| SE   | chr6  | Parp11        | + | 127453315-127453822-127471548-127471668-127474236-127474311        | 263 | 149 | 0.6307 | 0.836  | -0.205 | 0.205 | 2.09729E-05 | 0.000436 |
| SE   | chr9  | Gria4         | + | 4424207-4424454-4427030-4427114-4423773-4432887                    | 269 | 149 | 0.5363 | 0.3313 | 0.205  | 0.205 | 0.00023104  | 0.003422 |
| SE   | chr9  | Ireb2         | + | 54882319-54882456-54883897-54884115-54885875-54885944              | 298 | 149 | 0.9823 | 0.7777 | 0.205  | 0.205 | 0           | 0        |
| A3SS | chr9  | Msahtd2       | + | 37510131-37513703-37517217-37517472-37517373-37517472              | 298 | 149 | 0.9527 | 0.4833 | 0.204  | 0.204 | 6.4567E-08  | 5.24E-06 |
| A5SS | chr10 | Ank3          | + | 69986083-69992475-69986083-69993762-69994372-69994446              | 298 | 149 | 0.909  | 0.7053 | 0.204  | 0.204 | 2.72116E-13 | 5.3E-11  |
| RI   | chrX  | Wdr45         | + | 7724187-7724291-7724187-7726292-7726198-7726292                    | 298 | 149 | 1      | 0.7963 | 0.204  | 0.204 | 5.61986E-06 | 7.1E-05  |
| SE   | chr7  | Phr1f         | + | 141258032-141260707-141260915-141261114-141261213-141261542        | 286 | 149 | 0.9663 | 0.762  | 0.204  | 0.204 | 4.85473E-09 | 2.57E-07 |
| SE   | chr6  | Mical3        | + | 120962755-120962865-120969355-120969492-120973403-120973647        | 286 | 149 | 0.398  | 0.6017 | -0.204 | 0.204 | 8.57866E-05 | 0.001466 |
| SE   | chr7  | Zlfand6       | + | 84632439-84634409-84642286-84642437-84679310-84679408              | 292 | 149 | 0.0467 | 0.261  | -0.204 | 0.204 | 0           | 0        |
| SE   | chr6  | Adcyap1r1     | + | 55484942-55485033-55491227-55491310-55494077-55494206              | 232 | 149 | 0.4507 | 0.2457 | 0.204  | 0.204 | 4.53049E-12 | 4.13E-10 |
| SE   | chr9  | Ppp6r3        | + | 3459361-3459480-3459747-3459764-3464545-3464695                    | 166 | 149 | 0.548  | 0.344  | 0.204  | 0.204 | 2.98638E-07 | 1.03E-05 |
| SE   | chr13 | Hsf1          | + | 131564768-131564983-131567502-131567678-131579311-131579425        | 298 | 149 | 0.1207 | 0.3243 | -0.204 | 0.204 | 2.66343E-12 | 2.54E-10 |
| SE   | chr11 | Sic38a10      | + | 120141600-120141645-120147721-120147838-120150980-120151063        | 226 | 149 | 0.3953 | 0.599  | -0.204 | 0.204 | 1.53624E-06 | 4.44E-05 |
| SE   | chr15 | Hsf1          | + | 76495970-76496078-76497619-76497694-76497768-76497829              | 264 | 149 | 0.9707 | 0.767  | 0.204  | 0.204 | 1.34309E-08 | 6.38E-07 |
| SE   | chr5  | Cdk8          | + | 146286108-146286239-146292639-146292767-146295163-146295232        | 277 | 149 | 0.913  | 0.709  | 0.204  | 0.204 | 1.35442E-06 | 3.99E-05 |
| A3SS | chr4  | Pust1         | + | 155890499-155890669-155889434-155889723-155889934-155889956        | 275 | 149 | 0.693  | 0.896  | 0.203  | 0.203 | 2.42226E-05 | 0.00078  |
| MXE  | chr2  | Metap1d       | + | 71512126-71512162-71515637-71515800-71523802-71523849-71524717-715 | 298 | 196 | 0.6867 | 0.4833 | 0.203  | 0.203 | 4.72825E-05 | 0.001205 |
| MXE  | chr15 | Mapk15        | + | 75993731-75993928-75994845-75994943-75995072-75995101-75995234-759 | 247 | 178 | 0.7843 | 0.9877 | 0.203  | 0.203 | 4.68032E-09 | 3.9E-07  |
| RI   | chr19 | Sfxn2         | + | 46594672-46594868-46594672-46596901-46596668-46596901              | 298 | 149 | 0.7697 | 0.973  | 0.203  | 0.203 | 1.98915E-07 | 3.63E-06 |
| RI   | chr11 | Gas2i1        | + | 5063826-5064478-5063826-5065904-5064837-5065904                    | 298 | 149 | 0.7903 | 0.5877 | 0.203  | 0.203 | 0.00070503  | 0.004651 |
| SE   | chr2  | Six1b         | + | 174091482-174091622-174092413-174092567-174093434-174093525        | 298 | 149 | 0.749  | 0.5463 | 0.203  | 0.203 | 4.68208E-06 | 0.000118 |
| SE   | chr4  | Npr2          | + | 43643054-43643174-43643335-43643408-43643606-43643683              | 223 | 149 | 0.5423 | 0.7453 | 0.203  | 0.203 | 1.3709E-06  | 4.02E-05 |
| SE   | chr5  | Sic15a4       | + | 127604111-127604158-127604338-127604706-127608772-127609061        | 298 | 149 | 0.9527 | 0.75   | 0.203  | 0.203 | 5.9525E-06  | 0.000442 |
| SE   | chr6  | Plekha5       | + | 140579427-140579476-140580483-140580535-140581968-140582042        | 221 | 149 | 0.9333 | 0.73   | 0.203  | 0.203 | 1.5196E-08  | 7.05E-07 |
| SE   | chr8  | Camsap3       | + | 3599217-3599249-3600358-3600405-3600676-3600814                    | 196 | 149 | 0.6253 | 0.422  | 0.203  | 0.203 | 2.95433E-05 | 0.000917 |
| SE   | chr7  | Sic8a3        | + | 81432644-81432774-81437745-81437813-81441773-81441790              | 217 | 149 | 0.113  | 0.3327 | -0.203 | 0.203 | 4.85484E-09 | 2.57E-07 |
| SE   | chr16 | Fgfd4         | + | 16482001-16482059-16489306-16489372-16489704-16489842              | 215 | 149 | 0.1087 | 0.3117 | -0.203 | 0.203 | 4.27281E-05 | 0.000805 |
| SE   | chr16 | Fyt1d1        | + | 32988878-32988939-32900633-32900707-32902419-32902545              | 223 | 149 | 0.985  | 0.7617 | 0.203  | 0.203 | 0           | 0        |
| SE   | chr17 | 3110052M02Rik | + | 21652267-21652345-21658096-21658332-21657519-21657611              | 298 | 149 | 0.885  | 0.662  | 0.203  | 0.203 | 1.60392E-06 | 4.61E-05 |
| SE   | chr19 | Sorbs1        | + | 40336986-40337035-40340045-40340146-40344356-40344349              | 250 | 149 | 0.8757 | 0.6723 | 0.203  | 0.203 | 0.00532868  | 0.048704 |
| A3SS | chr4  | Hook1         | + | 96014808-96014901-96015665-96017025-96016943-96017025              | 298 | 149 | 0.986  | 0.784  | 0.202  | 0.202 | 8.75077E-10 | 9.95E-08 |
| A3SS | chr2  | Pdcs1         | + | 22929744-22929857-22934319-22935639-22935559-22935639              | 298 | 149 | 0.5983 | 0.396  | 0.202  | 0.202 | 0.001275149 | 0.01844  |
| A5SS | chr11 | Cdk3          | + | 52004187-52004417-52004187-52004510-52004913-52005092              | 241 | 149 | 0.5    | 0.298  | 0.202  | 0.202 | 0.000585317 | 0.007401 |
| MXE  | chr5  | Vps37d        | + | 135072899-135073983-135074394-135074476-135076458-135076645-13507  | 298 | 231 | 0.09   | 0.292  | -0.202 | 0.202 | 1.71953E-10 | 2.08E-08 |
| MXE  | chr17 | Ptprs         | + | 56426387-56426455-56427939-56428132-56428852-56429157-56434453-564 | 298 | 231 | 0.981  | 0.729  | -0.202 | 0.202 | 0           | 0        |
| RI   | chr9  | Ipk6k2        | + | 108796064-108796396-108796064-108796572-108796541-108796572        | 292 | 149 | 0.7323 | 0.53   | 0.202  | 0.202 | 1.02771E-11 | 4.22E-10 |
| SE   | chr17 | Phf10         | + | 14944994-14945184-14946199-14946387-14946655-14946763              | 292 | 149 | 0.997  | 0.7953 | 0.202  | 0.202 | 0           | 0        |
| SE   | chr16 | Anks3         | + | 4957641-4957762-4960397-4960588-4964120-4964203                    | 298 | 149 | 0.444  | 0.2423 | 0.202  | 0.202 | 5.10195E-07 | 1.68E-05 |
| SE   | chr2  | Mtq2          | + | 180084064-180084282-180084451-180084562-180085380-180085902        | 280 | 149 | 0.9553 | 0.7533 | 0.202  | 0.202 | 7.71117E-05 | 0.001337 |
| SE   | chr2  | Csmpp3        | + | 65847567-65845884-65860531-65860692-65877956-65878075              | 298 | 149 | 0.4417 | 0.6433 | -0.202 | 0.202 | 1.47702E-05 | 0.00032  |
| SE   | chrX  | Map702        | + | 159459378-159459483-159460267-159460365-159462114-159462224        | 247 | 149 | 0.9103 | 0.7087 | 0.202  | 0.202 | 7.56188E-08 | 3E-06    |
| SE   | chr2  | Upf2          | + | 5951457-5951553-5952428-5952621-5957471-5957805                    | 297 | 149 | 0.2207 | 0.423  | -0.202 | 0.202 | 0.001711813 | 0.018737 |
| SE   | chr4  | Adgrb2        | + | 130014551-130014636-130014935-130015033-130017062-130017233        | 248 | 149 | 0.2367 | 0.4383 | -0.202 | 0.202 | 1.18794E-14 | 1.66E-12 |
| SE   | chr3  | Srsf11        | + | 158023243-158024231-158024698-158024761-158026255-158026858        | 212 | 149 | 0.876  | 0.674  | 0.202  | 0.202 | 4.18317E-05 | 0.00079  |
| SE   | chr13 | Cenph         | + | 100759686-100760194-100781761-100781924-100783550-100783601        | 298 | 149 | 0.983  | 0.7807 | 0.202  | 0.202 | 8.15289E-07 | 2.55E-05 |
| A3SS | chr2  | Sic39a13      | + | 91066013-91066126-91065582-91065739-91065582-91065700              | 187 | 149 | 0.2847 | 0.4853 | -0.201 | 0.201 | 0.001347382 | 0.019206 |
| A5SS | chr10 | Izumo4        | + | 80704418-80704435-80704418-80704472-80704699-80704713              | 185 | 149 | 0.4477 | 0.247  | 0.201  | 0.201 | 5.81614E-05 | 0.001151 |
| A5SS | chr12 | Smek1         | + | 101053468-101053584-101053429-101053584-101051531-101051662        | 187 | 149 | 0.291  | 0.492  | -0.201 | 0.201 | 0.005140038 | 0.040877 |
| MXE  | chr4  | Gm11837       | + | 14936441-14936539-14942200-14942275-14947439-14947545-14952621-149 | 224 | 255 | 0.0533 | 0.2543 | -0.201 | 0.201 | 9.2826E-06  | 0.000298 |
| MXE  | chr6  | Ccdc136       | + | 29414786-29414980-29415431-29415655-29421991-29422097-29426625-294 | 298 | 255 | 0.4063 | 0.6077 | -0.201 | 0.201 | 0.00881678  | 0.013578 |
| SE   | chr3  | Nbea          | + | 55992334-55992514-56000460-56000640-56002724-56002941-56004534-560 | 298 | 298 | 0.7457 | 0.5447 | -0.201 | 0.201 | 3.25698E-11 | 4.73E-09 |
| MXE  | chrX  | Atp11c        | + | 60229165-60229252-60229923-60230013-60236372-60236437-60236557-602 | 214 | 239 | 0.314  | 0.113  | 0.201  | 0.201 | 0.002610534 | 0.031764 |
| SE   | chr4  | Srsf4         | + | 131884276-131884482-131884276-131885492-131885492-131885492        | 298 | 149 | 0.4383 | 0.237  | 0.201  | 0.201 | 2.73981E-05 | 0.000279 |
| RI   | chr2  | Rbm39         | + | 156172828-156174168-156172828-156177385-156177385-156177385        | 298 | 149 | 0.852  | 0.6507 | 0.201  | 0.201 | 3.59802E-06 | 4.79E-05 |
| RI   | chr6  | Maq1          | + | 93675453-93680877-93675453-93683090-93682952-93683090              | 298 | 149 | 0.8863 | 0.6853 | 0.201  | 0.201 | 1.19326E-08 | 2.74E-07 |
| SE   | chr8  | Borcs8        | + | 70145024-70145134-70145811-70145890-70147090-70148635              | 228 | 149 | 0.961  | 0.7603 | 0.201  | 0.201 | 9.21546E-07 | 2.84E-05 |
| SE   | chr13 | Tmem14c       | + | 41016250-41016398-41017115-41017173-41017706-41017782              | 207 | 149 | 0.81   | 0.6091 | 0.201  | 0.201 | 6.53377E-12 | 5.81E-10 |
| SE   | chr13 | Pikp          | + | 6588489-6588653-6597859-6598040-65989739-6598982                   | 298 | 149 | 0.7473 | 0.5467 | 0.201  | 0.201 | 0.003822878 | 0.036969 |
| SE   | chr3  | Misd8         | + | 40821863-40822110-40822195-40822312-40823827-40823961              | 286 | 149 | 0.9897 | 0.7883 | 0.201  | 0.201 | 2.88963E-08 | 1.27E-06 |
| SE   | chr19 | Chuk          | + | 44084417-44084478-44086998-44087059-44087916-44088039              | 298 | 149 | 0.9173 | 0.7707 | 0.201  | 0.201 | 1.37209E-11 | 1.15E-09 |
| SE   | chr5  | Ogfd02        | + | 124113429-124113528-124114065-124114192-124114398-124114645        | 276 | 149 | 0.8187 | 0.8193 | 0.201  | 0.201 | 3.26038E-05 | 0.000641 |
| SE   | chr9  | Mmap7b        | + | 110079781-110079893-110081421-110081610-110081841-110083173        | 298 | 149 | 0.358  | 0.5587 | -0.201 | 0.201 | 2.56462E-14 | 3.38E-12 |
| SE   | chrX  | Timm17a       | + | 7899336-7899469-7900961-7901060-7903673-7903736                    | 248 | 149 | 0.945  | 0.7437 | 0.201  | 0.201 | 0           | 0        |
| SE   | chr6  | Tmem209       | + | 30508454-305088512-30508866-30508842-30509685-30509783             | 298 | 149 | 0.782  | 0.581  | 0.201  | 0.201 | 0.001594258 | 0.017643 |
| SE   | chr15 | Hsf1          | + | 76499948-76500053-76500131-76500196-76500267-76500336              | 214 | 149 | 0.4757 | 0.677  | -0.201 | 0.201 | 0.01819892  | 0.019708 |
| SE   | chr11 | Srx1f         | + | 9877133-9877322-9877444-98774495-9877698-98777061                  | 203 | 149 | 0.932  | 0.731  | 0.201  | 0.201 | 2.60073E-11 | 2.97E-09 |
| MXE  | chr12 | Mvt1l         | + | 29783855-29783888-29784425-29784444-29811374-29811734-29832288-298 | 211 | 298 | 0.794  | 0.5943 | 0.2    | 0.2   | 8.7787E-08  | 5.       |



|      |       |               |   |                                                                     |     |     |        |        |        |            |             |          |
|------|-------|---------------|---|---------------------------------------------------------------------|-----|-----|--------|--------|--------|------------|-------------|----------|
| MXE  | chr10 | Pex7          | - | 19887060-19887173:19888656-19888762:19894250-19894358:19904563-199  | 257 | 255 | 0.0657 | 0.2623 | -0.197 | 0.197      | 1.55058E-06 | 6.35E-05 |
| RI   | chr3  | Thb3c         | - | 89216681-89216687:89216681-89217941:89217685-89217941               | 298 | 149 | 0.443  | 0.2463 | 0.197  | 0.197      | 7.4996E-11  | 2.61E-09 |
| SE   | chr3  | Ank2          | - | 127104761-127104862:127248134-127248232:127498668-127500347         | 247 | 149 | 0.5437 | 0.7403 | -0.197 | 0.197      | 0.000454551 | 0.006111 |
| SE   | chr19 | Trpm3         | + | 22733000-22733171:22749771-22749845:22766634-22766808               | 223 | 149 | 0.179  | 0.3763 | -0.197 | 0.197      | 1.38606E-06 | 4.06E-05 |
| SE   | chr18 | Mapk4         | + | 73935006-73935167:73937130-73937274:73969891-73971276               | 293 | 149 | 0.949  | 0.7529 | 0.197  | 0.197      | 7.12804E-06 | 0.000171 |
| SE   | chr1  | Cdc42bpa      | + | 180084372-180084505:180093944-180094186:180094381-180094491         | 298 | 149 | 0.9027 | 0.7597 | 0.197  | 0.197      | 6.07572E-08 | 2.47E-06 |
| SE   | chr2  | Ncoa5         | - | 165012836-165013162:165023146-165023212:165034683-165034779         | 215 | 149 | 0.7917 | 0.5943 | 0.197  | 0.197      | 1.11022E-15 | 1.75E-13 |
| SE   | chr5  | Cdc7          | + | 106976630-106976712:106979316-106979444:106982964-106984439         | 277 | 149 | 0.94   | 0.7433 | 0.197  | 0.197      | 1.30807E-05 | 0.000289 |
| SE   | chr10 | Cco10a        | - | 128364405-128364506:128365023-128365245:128368007-128368153         | 298 | 149 | 0.9767 | 0.7797 | 0.197  | 0.197      | 3.44158E-12 | 3.19E-10 |
| SE   | chr7  | Ube3a         | + | 59247173-59247217:59262022-59262058:59271947-59272236               | 185 | 149 | 0.0473 | 0.244  | -0.197 | 0.197      | 1.87295E-13 | 2.18E-11 |
| SE   | chr12 | Trim9         | - | 70250957-70251260:70252443-70252484:70268062-70268200               | 190 | 149 | 0.2473 | 0.444  | -0.197 | 0.197      | 0.003105217 | 0.031004 |
| SE   | chr10 | Jmjd1c        | + | 67215270-67215375:67218038-67218181:67218277-67218469               | 292 | 149 | 0.96   | 0.7627 | 0.197  | 0.197      | 2.50595E-06 | 6.8E-05  |
| SE   | chr18 | Cables1       | + | 11888737-11888829:11905925-11906002:11923360-11923456               | 226 | 149 | 0.4037 | 0.2063 | 0.197  | 0.197      | 0.002736759 | 0.027903 |
| A3SS | chr2  | Ehmt1         | - | 24877455-248774626:24863772-24863929:24863772-24863908              | 169 | 149 | 0.3003 | 0.154  | 0.196  | 0.196      | 1.08168E-07 | 7.96E-06 |
| A3SS | chr2  | Arfgap1       | + | 180979661-180979720:180980398-180980474:180980404-180980474         | 154 | 149 | 0.959  | 0.743  | 0.196  | 0.196      | 0.00102215  | 0.002483 |
| A5SS | chr17 | Slc25a27      | - | 43664078-43664265:43664074-43664265:43661614-43661698               | 152 | 149 | 0.829  | 0.6333 | 0.196  | 0.196      | 3.99812E-06 | 0.000123 |
| A5SS | chr15 | Chkb          | - | 89428714-89428827:89428411-89428827:89428134-89428229               | 298 | 149 | 0.9827 | 0.7863 | 0.196  | 0.196      | 0           | 0        |
| A5SS | chrX  | Armxc2        | - | 134807621-134807725:134807454-134807725:134807262-134807327         | 298 | 149 | 0.8573 | 0.661  | 0.196  | 0.196      | 1.92145E-11 | 2.23E-09 |
| A5SS | chr9  | Cep70         | + | 99277937-99278018:99277937-99278161:99281028-99281102               | 291 | 149 | 1      | 0.804  | 0.196  | 0.196      | 1.12656E-06 | 4.21E-05 |
| MXE  | chr2  | Mtg2          | + | 180070593-180070615:180071794-180071886:180078619-180078823:1800802 | 241 | 298 | 0.06   | 0.2563 | -0.196 | 0.196      | 7.33478E-08 | 4.74E-06 |
| RI   | chrX  | CT7370        | - | 104076761-104081102:104076761-104083283:104083154-104083283         | 298 | 149 | 0.96   | 0.7637 | 0.196  | 0.196      | 8.23785E-14 | 4.69E-12 |
| RI   | chr11 | Zfp207        | + | 80403365-80403408:80403365-80403662:80403661-80403662               | 298 | 149 | 0.7657 | 0.5697 | 0.196  | 0.196      | 4.35083E-10 | 1.33E-08 |
| RI   | chr3  | Tpm3          | + | 90090010-90090019:90090010-90091091:90091013-90091091               | 298 | 149 | 0.3017 | 0.1057 | 0.196  | 0.196      | 2.19758E-07 | 3.93E-06 |
| SE   | chr5  | Asphd2        | - | 112391158-112392255:112393785-112393999:112394715-112394801         | 298 | 149 | 0.3427 | 0.539  | -0.196 | 0.196      | 5.73515E-10 | 3.59E-08 |
| SE   | chr6  | Dgki          | - | 36975147-36975247:36994459-36994921:37000042-37000241               | 211 | 149 | 0.7473 | 0.551  | 0.196  | 0.196      | 0.00188004  | 0.020252 |
| SE   | chr5  | Aasht         | - | 76391918-76392185:76394209-76394380:76395423-76395514               | 298 | 149 | 0.792  | 0.988  | -0.196 | 0.196      | 1.0592E-06  | 3.21E-05 |
| SE   | chr14 | Fam149b       | + | 20352704-20352839:20363263-20363450:20367946-20367952               | 298 | 149 | 0.8043 | 1      | -0.196 | 0.196      | 6.28016E-09 | 3.23E-07 |
| SE   | chr9  | Bmper         | + | 23373833-23373942:23375566-23375706:23377638-23377742               | 289 | 149 | 1      | 0.8043 | 0.196  | 0.196      | 0.03342E-06 | 7.99E-05 |
| SE   | chr8  | Cse1          | - | 120572636-120572906:120574171-120574278:120574934-120575305         | 256 | 149 | 0.2317 | 0.428  | -0.196 | 0.196      | 1.2725E-05  | 0.000283 |
| SE   | chr15 | Trmu          | + | 85893954-85894200:85894926-85895026:85896380-85896504               | 249 | 149 | 0.9517 | 0.7557 | 0.196  | 0.196      | 0.38477E-09 | 4.09E-07 |
| SE   | chr12 | Trim9         | - | 70248794-70251260:70255038-70255226:70268062-70268200               | 298 | 149 | 0.1217 | 0.3177 | -0.196 | 0.196      | 3.91735E-05 | 0.000746 |
| A3SS | chr17 | Ati2          | - | 79852525-79852956:79848390-79850793:79848390-79850278               | 298 | 149 | 0.1217 | 0.3177 | -0.196 | 0.196      | 0.00048573  | 0.008627 |
| MXE  | chr8  | Rllpr         | + | 105697217-105697438:105697561-105697841:105697868-105697945:105698  | 229 | 226 | 1.123  | 0.318  | -0.195 | 0.195      | 9.76101E-10 | 9.7E-08  |
| MXE  | chr7  | B230209E15Rik | - | 61534745-61534785:61535076-61535488:61604518-61604700:61615160-616  | 298 | 298 | 0.4297 | 0.6243 | -0.195 | 0.195      | 0.00223067  | 0.028197 |
| MXE  | chr4  | Ptprd         | - | 78594267-78594305:78594305-78594305:78594305-78594305:78594305      | 182 | 207 | 0.5073 | 0.7027 | -0.195 | 0.195      | 0.00436551  | 0.046937 |
| MXE  | chr2  | Cst33         | + | 104656889-104656919:104660519-104660714:104662944-104663447:10466   | 298 | 298 | 0.0183 | 0.2133 | -0.195 | 0.195      | 1.75415E-14 | 4.53E-12 |
| MXE  | chr9  | Hmcd1c        | + | 76056452-76056559:76072627-76072722:76130312-76130437:76133755-761  | 244 | 274 | 0.3537 | 0.5483 | -0.195 | 0.195      | 8.79047E-05 | 0.002028 |
| RI   | chr15 | Hdac10        | - | 89124175-89124253:89124175-89124588:89124588-89124588               | 298 | 149 | 0.5893 | 0.195  | 0.195  | 0.00113952 | 0.000967    |          |
| RI   | chr7  | Atxn2         | - | 126491708-126492215:126491708-126492608:126492449-126492608         | 298 | 149 | 0.592  | 0.397  | 0.195  | 0.195      | 9.49352E-13 | 4.4E-11  |
| RI   | chr7  | Gygf1         | + | 137520547-137520800:137520547-137521002:137520885-137521002         | 232 | 149 | 0.324  | 0.519  | -0.195 | 0.195      | 0.000163165 | 0.001309 |
| SE   | chr4  | Srsf4         | + | 131873612-131873870:131886131-131886304:131891207-131891349         | 298 | 149 | 0.1633 | 0.3587 | -0.195 | 0.195      | 5.89761E-08 | 2.4E-06  |
| SE   | chr14 | Pbrn1         | + | 31019138-31019293:31022720-31022859:31023607-31023170               | 288 | 149 | 0.645  | 0.45   | 0.195  | 0.195      | 9.17193E-05 | 0.001551 |
| SE   | chr4  | Tnc           | - | 63974646-63976568:64000698-64000970:64006246-64006509               | 298 | 149 | 0.707  | 0.9017 | -0.195 | 0.195      | 2.30926E-07 | 8.21E-06 |
| SE   | chr6  | Pknox1        | - | 89335397-89335493:89337151-89337351:89340523-89340637               | 298 | 149 | 0.989  | 0.7434 | 0.195  | 0.195      | 0           | 0        |
| SE   | chr13 | Rnf180        | - | 105181450-105181675:105246663-105246698:105252252-105252347         | 180 | 149 | 0.9847 | 0.719  | 0.195  | 0.195      | 9.97174E-08 | 3.84E-06 |
| SE   | chr11 | Lymr7         | - | 54839289-54841202:54848579-54848660:54850354-54850474               | 234 | 149 | 0.903  | 0.7077 | 0.195  | 0.195      | 0.00011284  | 0.001849 |
| SE   | chr7  | Actn4         | - | 28909903-28909988:28911490-28911575:28912240-28912321               | 234 | 149 | 0.1437 | 0.339  | -0.195 | 0.195      | 1.02312E-06 | 3.12E-05 |
| SE   | chr9  | Vstm5         | + | 15238918-15239358:15257230-15257556:15257651-15257791               | 298 | 149 | 0.9007 | 0.7953 | 0.195  | 0.195      | 4.91793E-11 | 3.73E-09 |
| SE   | chr8  | Mri1          | + | 84250576-84251711:84253863-84254087:84254176-84254352               | 298 | 149 | 0.9777 | 0.7823 | 0.195  | 0.195      | 1.16757E-11 | 9.93E-10 |
| SE   | chr8  | Evi5l         | + | 4200868-4200921:4201934-4201966:4202936-4203076                     | 181 | 149 | 0.8383 | 0.634  | 0.195  | 0.195      | 1.85335E-10 | 1.25E-08 |
| A3SS | chr7  | Chmp2a        | - | 13033329-13034042:13032289-13032565:13032289-13032350               | 298 | 149 | 0.7243 | 0.9183 | -0.194 | 0.194      | 0.00180358  | 0.023576 |
| A5SS | chr7  | Eed           | - | 89956344-89956413:89956255-89956413:89955531-89955604               | 237 | 149 | 0.8387 | 0.646  | -0.194 | 0.194      | 1.53734E-06 | 5.5E-05  |
| MXE  | chr2  | Mylf2         | - | 125097563-125097634:125097977-125098075:125098450-125098518:12510   | 217 | 247 | 0.1607 | 0.355  | -0.194 | 0.194      | 0           | 0        |
| RI   | chr15 | Trps1         | - | 50830829-50831006:50830829-50831958:50831607-50831958               | 298 | 149 | 0.884  | 0.6897 | 0.194  | 0.194      | 0.006500261 | 0.030298 |
| RI   | chr7  | Dyrk1b        | + | 28185714-28185749:28185714-28186029:28185834-28186029               | 232 | 149 | 0.9603 | 0.766  | 0.194  | 0.194      | 5.05104E-10 | 1.51E-08 |
| SE   | chr3  | Gba           | + | 89206134-89206368:89206760-89206812:89207227-89207315               | 201 | 149 | 0.0113 | 0.2057 | -0.194 | 0.194      | 6.02851E-14 | 7.6E-12  |
| SE   | chr9  | Hmgn3         | + | 83109942-83110429:83110691-83110874:83110993-83111106               | 298 | 149 | 0.2967 | 0.103  | 0.194  | 0.194      | 1.75315E-11 | 1.44E-09 |
| SE   | chr19 | Trpm3         | + | 22897670-22897810:22900134-22900163:22901046-22901335               | 178 | 149 | 0.9    | 0.7057 | 0.194  | 0.194      | 0.000204303 | 0.003079 |
| SE   | chr4  | Hnmp3         | + | 136310942-136311089:136314087-136314255:136316361-136316479         | 298 | 149 | 0.7373 | 0.5433 | 0.194  | 0.194      | 6.85341E-13 | 7.24E-11 |
| SE   | chr15 | Rdh13         | + | 4442594-4442749:4443737-4443771:44442030-4444321                    | 183 | 149 | 0.3617 | 0.1673 | 0.194  | 0.194      | 1.13185E-05 | 0.000256 |
| SE   | chr16 | Ilns1         | + | 91854573-91854655:91861194-91861239:91863257-91863378               | 194 | 149 | 1      | 0.8065 | -0.194 | 0.194      | 9.47776E-14 | 1.18E-11 |
| SE   | chr9  | Lingo1        | - | 56685120-56685281:56724301-56724346:56775539-56775648               | 193 | 149 | 0.7113 | 0.1907 | 0.194  | 0.194      | 0.000235238 | 0.003472 |
| A3SS | chr15 | Hdac10        | - | 89124532-89124588:89124175-89124588:89124175-89124253               | 298 | 149 | 0.4553 | 0.2623 | -0.193 | 0.193      | 0.000182065 | 0.003898 |
| MXE  | chr9  | Clasp2        | + | 113854173-113854346:113858581-113858604:11386010-113860137:1138662  | 172 | 166 | 0.6643 | 0.857  | -0.193 | 0.193      | 4.92951E-08 | 2.99E-06 |
| MXE  | chr3  | Adgr2         | + | 148815855-148817928:148818648-148818686:148820451-148820468:148821  | 166 | 187 | 0.133  | 0.3263 | -0.193 | 0.193      | 0.001022908 | 0.015245 |
| RI   | chr2  | Klnl23        | + | 69833675-69835250:69833675-69836651:69836094-69836651               | 298 | 149 | 0.9907 | 0.7973 | 0.193  | 0.193      | 0           | 0        |
| SE   | chr8  | Eps15l1       | - | 72340990-72341524:72358313-72358445:72367904-72367996               | 257 | 149 | 0.5267 | 0.72   | -0.193 | 0.193      | 1.18408E-05 | 0.000265 |
| SE   | chr10 | Pasp          | + | 60295946-60296002:60297537-60297545:60299098-60299229               | 181 | 149 | 0.8063 | 0.6137 | 0.193  | 0.193      | 0           | 0        |
| SE   | chr17 | Zfp871        | - | 32777157-32777172:32777401-32777527:3278138-32788287                | 275 | 149 | 0.986  | 0.793  | 0.193  | 0.193      | 2.13163E-14 | 2.85E-12 |
| SE   | chr17 | Nrxn1         | - | 90704066-90704367:90991367-90991378:90992115-90992144               | 160 | 149 | 0.8007 | 0.734  | -0.193 |            |             |          |

|      |       |               |   |                                                                      |     |     |        |        |        |            |             |          |
|------|-------|---------------|---|----------------------------------------------------------------------|-----|-----|--------|--------|--------|------------|-------------|----------|
| SE   | chr9  | Dalrd3        | + | 108571782-108571864:108571941-108572117:108572187-108572297          | 298 | 149 | 0.985  | 0.7963 | 0.189  | 0.189      | 1.11022E-16 | 1.97E-14 |
| SE   | chr6  | Phc1          | - | 122336858-122337015:122338472-122338480:122339598-122339622          | 157 | 149 | 0.517  | 0.328  | 0.189  | 0.189      | 0.003405361 | 0.03354  |
| SE   | chr13 | Simc1         | + | 54523970-54526672:54528304-54528551:54529154-54529223                | 298 | 149 | 0.8593 | 0.6703 | 0.189  | 0.189      | 0.001989537 | 0.021273 |
| SE   | chr2  | Ntnq2         | - | 29196982-29197149:29198814-29198815:29204898-29204924                | 250 | 149 | 0.0273 | 0.216  | -0.189 | 0.189      | 0           | 0        |
| SE   | chr6  | Zfp248        | - | 118453846-118453887:118454677-118454911:118455416-118455506          | 298 | 149 | 0.9723 | 0.783  | 0.189  | 0.189      | 2.90304E-06 | 7.71E-05 |
| SE   | chrX  | Cstf2         | + | 134072415-134072474:134072678-134072764:134073214-134073277          | 235 | 149 | 0.6573 | 0.8463 | -0.189 | 0.189      | 0.000330647 | 0.004637 |
| SE   | chr7  | Caly          | - | 140073941-140074100:140081381-140081538:140082093-140082031          | 298 | 149 | 0.327  | 0.5163 | -0.189 | 0.189      | 0.001606454 | 0.017748 |
| SE   | chrX  | Oqt           | + | 101640218-101640322:101643000-101643156:101643947-101644190          | 298 | 149 | 0.989  | 0.7907 | 0.189  | 0.189      | 0           | 0        |
| A3SS | chr6  | Nup205        | + | 35203963-35204013:35204695-35205534:35205325-35205534                | 298 | 149 | 0.2387 | 0.5053 | 0.189  | 0.189      | 1.89848E-14 | 5.07E-12 |
| MXE  | chr3  | Dck1          | + | 55502089-55502905:55506701-55506781:55516873-55516986:55521850-555   | 229 | 262 | 0.868  | 0.6797 | 0.188  | 0.188      | 0           | 0        |
| MXE  | chr14 | Csner2        | - | 36874936-36879762:36885751-36885790:36890294-36890426:36896255-368   | 281 | 188 | 0.5687 | 0.3777 | 0.188  | 0.188      | 0.000166839 | 0.003503 |
| SE   | chr3  | Celsr2        | - | 108939340-108939350:108939650-108939832:108939936-108939424          | 298 | 149 | 0.814  | 0.6257 | 0.188  | 0.188      | 9.62368E-06 | 0.000222 |
| SE   | chr7  | Mical2        | + | 112331896-112332039:112333829-112333954:112346722-112346908          | 274 | 149 | 0.893  | 0.7653 | 0.188  | 0.188      | 5.22042E-05 | 0.000959 |
| SE   | chr4  | Eps15         | + | 109379867-109380029:109382785-109382966:109385319-109387666          | 298 | 149 | 0.834  | 0.646  | 0.188  | 0.188      | 3.47477E-08 | 1.5E-06  |
| SE   | chr19 | Fads1         | + | 10194318-10194397:10194489-10194614:10194871-10196874                | 274 | 149 | 0.9577 | 0.7697 | 0.188  | 0.188      | 0           | 0        |
| SE   | chr12 | Meq3          | + | 109545398-109546542:109549479-109549552:109549653-109549810          | 298 | 149 | 0.9517 | 0.764  | 0.188  | 0.188      | 0           | 0        |
| SE   | chr7  | Saxo2         | - | 82645660-82645829:82645923-82646460:82648392-82648481                | 222 | 149 | 0.936  | 0.748  | 0.188  | 0.188      | 0.000278915 | 0.00402  |
| SE   | chr9  | Lztf11        | - | 123712430-123712624:123715300-123715424:123717526-123717557          | 273 | 149 | 0.942  | 0.7543 | 0.188  | 0.188      | 2.23223E-08 | 1E-06    |
| SE   | chr3  | Csde1         | + | 103039933-103040042:103040441-103040553:103041145-103041242          | 241 | 149 | 0.3667 | 0.1783 | 0.188  | 0.188      | 0           | 0        |
| SE   | chr7  | Brsk2         | + | 141998633-141998722:142000842-142000889:142002063-142004244          | 298 | 149 | 0.5787 | 0.7667 | -0.188 | 0.188      | 0.000759465 | 0.009478 |
| A3SS | chr7  | Tsq101        | - | 46910745-46910810:46908905-46909068:46909805-46909891                | 126 | 149 | 0.9267 | 0.74   | 0.187  | 0.187      | 0           | 0        |
| A3SS | chr17 | Ptprs         | - | 56427791-56427817:56426556-56426653:56426556-56426653                | 138 | 149 | 0.1713 | 0.358  | -0.187 | 0.187      | 0.001691431 | 0.022603 |
| A3SS | chr14 | Ndsr2         | - | 20724748-20724820:20724711-20724820:20724461-20724563                | 265 | 149 | 0.8623 | 0.675  | -0.187 | 0.187      | 0.00073411  | 0.009434 |
| A3SS | chr6  | C87436        | + | 86438610-86438847:86438610-86439258:86443727-86443975                | 298 | 149 | 0.662  | 0.8493 | -0.187 | 0.187      | 0.001003061 | 0.011624 |
| MXE  | chr1  | Nckap5        | - | 125913636-125915021:125976926-125977062:125981383-125981697:126014   | 298 | 285 | 0.6383 | 0.8237 | -0.187 | 0.187      | 0.000399128 | 0.007134 |
| MXE  | chr2  | Opr1          | + | 181719357-181715489:181715690-181715945:181716502-181716535:181717   | 298 | 182 | 0.9173 | 0.73   | 0.187  | 0.187      | 9.0039E-05  | 0.002076 |
| SE   | chr1  | Enah          | - | 181300678-181300782:181311174-181311174-18131185:181366394-181366571 | 160 | 149 | 0.34   | 0.163  | 0.187  | 0.187      | 1.42814E-07 | 5.33E-06 |
| SE   | chr2  | Tmm12a        | + | 18250820-18251001:18251359-18251474:18251549-18251660                | 264 | 149 | 0.763  | 0.95   | -0.187 | 0.187      | 2.74974E-07 | 9.89E-06 |
| SE   | chr16 | Slx4          | + | 3994708-3994920:3995694-3995877:3999118-3999340                      | 298 | 149 | 0.8123 | 0.625  | 0.187  | 0.187      | 0.001248606 | 0.014249 |
| SE   | chr17 | Wiz           | - | 32358943-32359424:32360038-32360427:32361461-32361964                | 298 | 149 | 0.5137 | 0.701  | -0.187 | 0.187      | 4.56158E-06 | 0.000115 |
| SE   | chr17 | Tulp4         | + | 6106828-6106896:6121828-61212344:6137211-6139156                     | 298 | 149 | 0.226  | 0.4127 | -0.187 | 0.187      | 2.3176E-08  | 1.2E-06  |
| SE   | chr6  | P3h3          | - | 124845202-124845319:124845508-124845568:124845942-124846043          | 298 | 149 | 0.919  | 0.732  | 0.187  | 0.187      | 1.68291E-08 | 7.74E-07 |
| SE   | chr4  | Dock7         | - | 98946629-98946763:98952264-98953880:98955316-98955447                | 298 | 149 | 0.6433 | 0.4563 | 0.187  | 0.187      | 0.002890207 | 0.027513 |
| A5SS | chr10 | Smarrc2       | + | 128487934-128488017:128487934-128488359:128488896-128490174          | 298 | 149 | 0.2983 | 0.112  | 0.186  | 0.186      | 0           | 0        |
| A5SS | chr5  | Nsun5         | + | 135374927-135375065:135374927-135375105:135375275-135375485          | 298 | 149 | 0.4883 | 0.3027 | 0.186  | 0.186      | 7.39888E-05 | 0.001412 |
| MXE  | chr11 | Ogoh          | + | 6316785-6316855-6316978-6317000:6324878-6324922:6334533-6334648      | 251 | 193 | 0.3457 | 0.1593 | 0.186  | 0.186      | 1.0060E-07  | 6.64E-06 |
| MXE  | chr8  | C300018D20Rik | - | 56957088-56957921:56962401-56962515:56972805-56972943:56973384-569   | 287 | 266 | 0.0817 | 0.2677 | -0.186 | 0.186      | 3.58218E-05 | 0.000958 |
| MXE  | chr5  | Adgr3         | + | 81771584-81771680:81787436-81787564:81792361-81792378:81794264-818   | 277 | 166 | 0.265  | 0.4513 | -0.186 | 0.186      | 0.00045499  | 0.047731 |
| RI   | chr1  | Fam134a       | + | 75146430-75146719:75146430-75147909:75146831-75147909                | 259 | 149 | 0.8853 | 0.6993 | 0.186  | 0.186      | 0           | 0        |
| SE   | chr17 | Gpacth11      | + | 78835516-78835678:78836974-78836920:78837831-78837902                | 275 | 149 | 0.918  | 0.732  | 0.186  | 0.186      | 9.32936E-08 | 3.61E-06 |
| SE   | chr7  | Mical2        | - | 112331896-112332039:112345246-112345353:112346722-112346908          | 256 | 149 | 0.9137 | 0.7273 | 0.186  | 0.186      | 1.05338E-05 | 0.00024  |
| SE   | chr12 | Ccdc85c       | - | 108207834-108207929:108211515-108211619:108221709-108221782          | 253 | 149 | 0.947  | 0.761  | 0.186  | 0.186      | 1.14709E-07 | 4.39E-06 |
| SE   | chr16 | Clec16a       | + | 10731661-10731819:10738392-10738515:10741614-10744877                | 272 | 149 | 0.4293 | 0.2437 | 0.186  | 0.186      | 0.000641757 | 0.008225 |
| SE   | chr6  | Adcyap1r1     | + | 55487659-55487742:55491227-55491310:55494077-55494206                | 232 | 149 | 0.93   | 0.7443 | 0.186  | 0.186      | 3.76222E-05 | 0.000642 |
| SE   | chr17 | Cyp4f17       | + | 32528047-32528111:32528276-32528363:32528717-32528809                | 236 | 149 | 0.2883 | 0.1027 | 0.186  | 0.186      | 0.00094594  | 0.01138  |
| SE   | chr1  | Kansl1        | - | 66801049-66802168:66807525-66807604:66811374-66811796                | 228 | 149 | 0.085  | 0.271  | -0.186 | 0.186      | 3.6833E-05  | 0.000709 |
| SE   | chr3  | Adgr12        | - | 148815586-148817928:148821280-148821408:148822955-148823051          | 277 | 149 | 0.974  | 0.589  | 0.186  | 0.186      | 6.98116E-08 | 2.79E-06 |
| SE   | chr15 | Hsf1          | + | 76495970-76496078:76496453-76496589:76497768-76497829                | 285 | 149 | 0.974  | 0.7883 | 0.186  | 0.186      | 6.68206E-09 | 3.41E-07 |
| SE   | chr15 | Klfc2         | + | 76661236-76661384:76661480-76661618:76661727-76661872                | 287 | 149 | 0.9143 | 0.728  | 0.186  | 0.186      | 5.04485E-13 | 5.44E-11 |
| SE   | chr13 | Gfm2          | + | 97150325-97150413:97153228-97153316:97155190-97155250                | 237 | 149 | 0.94   | 0.754  | 0.186  | 0.186      | 0.002767814 | 0.02815  |
| SE   | chr14 | Exoc5         | - | 49011922-49014349:49015534-49015632:49016198-49016306                | 247 | 149 | 0.978  | 0.7923 | -0.186 | 0.186      | 5.32907E-15 | 7.89E-13 |
| A5SS | chr7  | Lclat1        | + | 73107985-73108145:73107985-73108156:73161823-73161991                | 159 | 149 | 0.644  | 0.829  | 0.185  | 0.185      | 0.002834773 | 0.025991 |
| MXE  | chr15 | Kctd17        | + | 78435585-78435710:78436901-78437099:78437158-78437232:78437584-784   | 298 | 223 | 0.8057 | 0.6203 | 0.185  | 0.185      | 5.9554E-05  | 0.001365 |
| MXE  | chr15 | Kct25a14      | + | 48623578-48623828:48623962-48624197:48628136-48628143:48629252-486   | 298 | 196 | 0.8607 | 0.185  | 0.185  | 0.00326185 | 0.006109    |          |
| MXE  | chr9  | Zfp426        | - | 20473028-20473108:20474907-20475033:20476396-20476478:20478133-204   | 231 | 275 | 0.508  | 0.693  | -0.185 | 0.185      | 0.000929065 | 0.014186 |
| RI   | chr1  | Zcohc2        | + | 106029752-106031233:106029752-106034077:106032096-106034077          | 298 | 149 | 0.4003 | 0.215  | 0.185  | 0.185      | 0.00587688  | 0.027912 |
| RI   | chr15 | 43711         | + | 82291253-82291318:82291253-82294574:82293246-82294574                | 298 | 149 | 0.922  | 0.733  | 0.185  | 0.185      | 0           | 0        |
| SE   | chr5  | Giqy1         | + | 137518482-137518612:137518482-137518986:137518878-137518986          | 298 | 149 | 0.4707 | 0.2853 | 0.185  | 0.185      | 0.000847394 | 0.005458 |
| SE   | chr15 | Senp1         | - | 98076550-98076709:98076912-98077042:98082243-98082327                | 279 | 149 | 0.0683 | 0.2537 | -0.185 | 0.185      | 4.47113E-07 | 1.57E-05 |
| SE   | chr6  | Eif2ak3       | + | 70878835-70878968:70881528-70881718:70882265-70882427                | 298 | 149 | 1      | 1.8153 | 0.185  | 0.185      | 2.24479E-08 | 1.01E-06 |
| SE   | chr15 | Rai14         | - | 10598353-10598582:10599720-10599784:10610005-10610093                | 213 | 149 | 0.99   | 0.803  | 0.185  | 0.185      | 5.11402E-09 | 2.69E-07 |
| SE   | chr2  | Sdcccag3      | - | 26388492-26388560:26388916-26389065:26389149-26389326                | 298 | 149 | 0.2533 | 0.4383 | -0.185 | 0.185      | 0.004219496 | 0.040106 |
| SE   | chr3  | Fnpb1         | - | 122549156-122549265:122562412-12256570:122557903-122558106           | 298 | 149 | 0.3723 | 0.1877 | 0.185  | 0.185      | 0           | 0        |
| SE   | chr7  | Zfp228        | + | 6390400-6390560:6392182-6392296:6393367-6393575                      | 263 | 149 | 0.6233 | 0.4387 | 0.185  | 0.185      | 0.002577745 | 0.026569 |
| SE   | chr10 | Dmd50         | + | 62684914-626847201:62684734-62684764:62651025-62651248               | 298 | 149 | 0.427  | 0.612  | -0.185 | 0.185      | 8.66475E-06 | 0.000202 |
| SE   | chr1  | Nvslab1       | + | 151354634-151354759:151355167-151355311:151356129-151356236          | 293 | 149 | 0.227  | 0.4117 | -0.185 | 0.185      | 0           | 0        |
| SE   | chr12 | Lfrn5         | + | 61669480-61669694:61768008-61768077:61839408-61840812                | 218 | 149 | 0.1803 | 0.365  | -0.185 | 0.185      | 1.46232E-07 | 5.45E-06 |
| SE   | chr2  | Odf2          | + | 29892186-29892276:29893001-29893154:29893444-29893512                | 298 | 149 | 0.6733 | 0.4887 | 0.185  | 0.185      | 4.4752E-06  | 0.000113 |
| SE   | chr3  | Adgr12        | - | 148820973-148821025:148821280-148821408:148822955-148823051          | 298 | 149 | 0.979  | 0.7937 | 0.185  | 0.185      | 4.68919E-11 | 3.57E-09 |
| A3SS | chr3  | Dck2          | - | 88792089-88792111:88786151-88789490:88786151-88787412                | 277 | 149 | 0.957  | 0.573  | 0.184  | 0.184      | 0.00107224  | 0.016119 |
|      |       |               |   |                                                                      |     |     |        |        |        |            |             |          |

|      |       |               |   |                                                                    |     |     |          |        |        |       |                |          |
|------|-------|---------------|---|--------------------------------------------------------------------|-----|-----|----------|--------|--------|-------|----------------|----------|
| SE   | chr8  | Dctd          | + | 48137258-48137374:48138782-48138878:48140343-48141667              | 245 | 149 | 0.994    | 0.8123 | 0.182  | 0.182 | 6.01442E-09    | 3.1E-07  |
| SE   | chr10 | Tpd521        | - | 31338185-31338245:31341140-31341178:31343012-31343026              | 187 | 149 | 1        | 0.8183 | 0.182  | 0.182 | 8.29149E-09    | 4.15E-07 |
| SE   | chr1  | Nfasc         | - | 132576286-132576417:132584364-132584480:132593351-132593365        | 265 | 149 | 0.0233   | 0.2053 | -0.182 | 0.182 | 1.44178E-06    | 4.2E-05  |
| SE   | chr1  | Bag2          | + | 33745484-33747016:33748217-33748326:33757579-33757750              | 258 | 149 | 0.744    | 0.562  | 0.182  | 0.182 | 0.00130749E-06 | 0.014992 |
| SE   | chr1  | Slc44a5       | + | 154265459-154265543:154267677-154268620:154269840-154270072        | 298 | 149 | 0.963    | 0.718  | 0.182  | 0.182 | 1.64374E-05    | 0.000352 |
| SE   | chr2  | Sec61a2       | + | 5876841-5877001:5877688-5878008:5882581-5882690                    | 298 | 149 | 0.9627   | 0.807  | 0.182  | 0.182 | 2.72957E-10    | 1.81E-08 |
| SE   | chr11 | Syng7         | + | 84039211-84039321:84039656-84039691:84040797-84041455              | 184 | 149 | 0.1597   | 0.3413 | -0.182 | 0.182 | 1.06527E-05    | 0.000242 |
| SE   | chr2  | Popola        | + | 105807165-105807218:105808555-105808666:105809343-105809432        | 260 | 149 | 0.9723   | 0.7907 | 0.182  | 0.182 | 0              | 0        |
| SE   | chr19 | Ankrd13d      | + | 4281918-4282042:4282169-4282304:4282881-4283137                    | 284 | 149 | 0.9853   | 0.803  | 0.182  | 0.182 | 0              | 0        |
| A3SS | chr11 | Sec1411       | + | 117156801-117156902:117157259-117159268:117158754-117159268        | 298 | 149 | 0.6323   | 0.4513 | 0.181  | 0.181 | 2.13118E-05    | 0.000709 |
| A3SS | chr11 | Zfp207        | + | 80402646-80402711:80403365-80408557:80403601-80408557              | 298 | 149 | 0.894    | 0.7133 | 0.181  | 0.181 | 9.47021E-07    | 4.88E-05 |
| A3SS | chr16 | Dcbld2        | + | 58451661-58451785:58455126-58455276:58455203-58455276              | 225 | 149 | 0.883    | 0.7017 | 0.181  | 0.181 | 0.003788134    | 0.041112 |
| A3SS | chr2  | Strbp         | + | 37580673-37580806:37577770-37579748:37577770-37579748              | 298 | 149 | 1        | 0.819  | 0.181  | 0.181 | 3.0972E-06     | 0.000134 |
| A5SS | chr11 | Zfp62         | + | 49213590-49213642:49213590-49214654:49215064-49218785              | 298 | 149 | 0.3493   | 0.1683 | 0.181  | 0.181 | 0.000122304    | 0.002102 |
| A5SS | chr11 | Srxn1         | + | 96779696-96777061:96776094-96777061:96775374-96775433              | 212 | 149 | 0.3543   | 0.1733 | 0.181  | 0.181 | 0.001267006    | 0.013826 |
| MXE  | chr16 | Anks3         | + | 4941415-4941797:4942693-4942778:4943079-4943251:4943559-4943700    | 298 | 234 | 0.975    | 0.7937 | 0.181  | 0.181 | 1.18372E-10    | 1.47E-08 |
| MXE  | chr9  | Mto1          | + | 78457917-78458047:78460833-78461037:78461520-78461594:78464884-784 | 298 | 223 | 0.8977   | 0.7167 | 0.181  | 0.181 | 0.003217218    | 0.037385 |
| MXE  | chr16 | Senp5         | + | 31965745-31965828:31968800-31968937:31977680-31977757:31983264-319 | 226 | 286 | 0.335    | 0.5163 | -0.181 | 0.181 | 0.003894465    | 0.043213 |
| RI   | chr2  | Gm30189       | - | 174320908-174322197:174320908-174323965:174323664-174323965        | 298 | 149 | 0.3983   | 0.2167 | 0.181  | 0.181 | 0.011808502    | 0.049843 |
| SE   | chr17 | Rhbd1         | + | 25835969-25836193:25836411-25836572:25836988-25837127              | 298 | 149 | 0.435    | 0.2543 | 0.181  | 0.181 | 5.88314E-07    | 1.91E-05 |
| SE   | chr11 | Rpain         | + | 70974069-70974132:70974900-70975040:7097658-70977687               | 289 | 149 | 0.957    | 0.7763 | 0.181  | 0.181 | 7.16241E-06    | 0.000171 |
| SE   | chr2  | Mbd5          | + | 49018254-49018325:49086590-49086652:49099717-49099809              | 211 | 149 | 0.75     | 0.9307 | -0.181 | 0.181 | 0.000652756    | 0.008339 |
| SE   | chr12 | Ncoa1         | + | 4247362-4249750:4249836-4249980:4253657-4253746                    | 203 | 149 | 0.547    | 0.7283 | -0.181 | 0.181 | 2.18517E-05    | 0.000452 |
| SE   | chr17 | Zfp945        | + | 22861506-22861561:22861732-22861852:22865247-22866332              | 249 | 149 | 0.3747   | 0.194  | 0.181  | 0.181 | 0.000135178    | 0.002155 |
| SE   | chr18 | Pold2         | + | 31791840-31792020:31795288-31795383:31796050-31796642              | 264 | 149 | 0.8973   | 0.716  | 0.181  | 0.181 | 0              | 0        |
| SE   | chr19 | Bbs1          | + | 4892895-4893021:4894281-4894419:4894982-4895031                    | 298 | 149 | 0.9717   | 0.7903 | 0.181  | 0.181 | 2.65475E-07    | 9.28E-06 |
| SE   | chr9  | Cleap2        | + | 113876244-113876350:113878750-113878773:113879942-113880186        | 172 | 149 | 0.934    | 0.753  | 0.181  | 0.181 | 0              | 0        |
| SE   | chr11 | Map2k4        | + | 65766289-65766371:6576733-65767565:65788136-65788313               | 181 | 149 | 0.583    | 0.7643 | -0.181 | 0.181 | 9.16227E-06    | 0.000212 |
| SE   | chr2  | L3mbtl1       | + | 162968986-162967085:162967252-162967449:162967557-162967606        | 298 | 149 | 1        | 0.8193 | 0.181  | 0.181 | 0.00010691     | 0.001821 |
| SE   | chr10 | Fbxo5         | + | 5799158-5799822:5800256-5800435:5801152-5801242                    | 298 | 149 | 0.981    | 0.8003 | 0.181  | 0.181 | 1.93922E-07    | 7.03E-06 |
| SE   | chr10 | Pdm4          | + | 85902927-85903012:85904131-85904270:85905349-85905498              | 298 | 149 | 0.9817   | 0.8007 | 0.181  | 0.181 | 1.32549E-07    | 4.98E-06 |
| SE   | chr5  | Spr2          | + | 23525496-23525745:23526790-23526815:23527887-23528062              | 178 | 149 | 1        | 0.8193 | 0.181  | 0.181 | 0              | 0        |
| SE   | chr4  | 1110017D15Rik | + | 41505568-41505654:41507099-41507328:41507521-41507593              | 298 | 149 | 0.234    | 0.4147 | -0.181 | 0.181 | 0.001940993    | 0.020814 |
| SE   | chr4  | Slc4a7        | + | 14760235-14760341:14762348-14762522:14765577-14765710              | 298 | 149 | 0.845    | 0.664  | 0.181  | 0.181 | 0.001329972    | 0.015213 |
| A3SS | chrX  | Syn1          | + | 20862499-20863000:20860511-20861609:20860511-20861571              | 186 | 149 | 0.5217   | 0.3417 | 0.18   | 0.18  | 2.40548E-07    | 1.54E-05 |
| A3SS | chr9  | Tmed1         | + | 21509994-21510234:21509831-21509351:21509831-21509114              | 298 | 149 | 0.9653   | 0.785  | 0.181  | 0.181 | 1.46041E-06    | 6.89E-05 |
| A5SS | chr2  | Slp1galnac6   | + | 32608042-32608096:32608042-32608225:32609226-32609316              | 277 | 149 | 0.4067   | 0.227  | 0.18   | 0.18  | 0.005225221    | 0.041284 |
| MXE  | chr8  | Eps15l1       | + | 72340990-72341524:72345966-72346171:72358133-72358445:72367904-723 | 281 | 298 | 0.4603   | 0.6840 | -0.181 | 0.181 | 2.67743E-07    | 1.49E-05 |
| MXE  | chr11 | B9d1          | + | 61506344-61506412:61507628-61507736:61509470-61509532:61512372-615 | 260 | 211 | 0.514    | 0.3343 | 0.18   | 0.18  | 0.000176388    | 0.003644 |
| SE   | chr8  | Zdhnc1        | + | 105472991-105473069:105473206-105473299:105473484-105473566        | 282 | 149 | 0.893    | 0.7127 | 0.181  | 0.181 | 0.000168159    | 0.002604 |
| SE   | chr7  | Ntrk3         | + | 78300690-78302747:78304292-78304426:78356027-78356215              | 283 | 149 | 0.973    | 0.7933 | 0.181  | 0.181 | 7.45122E-10    | 4.56E-08 |
| SE   | chr11 | Trim37        | + | 87129716-87129817:87137590-87137630:87140485-87140601              | 189 | 149 | 0.877    | 0.6897 | 0.181  | 0.181 | 7.20689E-11    | 5.25E-09 |
| SE   | chr6  | Ppfbp1        | + | 146888080-146888683:146917748-146917908:146938086-146938989        | 298 | 149 | 0.1477   | 0.328  | -0.181 | 0.181 | 0.001174931    | 0.013683 |
| SE   | chr19 | Shtn1         | + | 58990189-58990381:58995118-58995138:5899983-58999946               | 269 | 149 | 0.989037 | 0.8087 | 0.18   | 0.18  | 4.64747E-09    | 2.48E-07 |
| SE   | chr5  | Tmem165       | + | 76204637-76204816:76207802-76207907:76208510-76209244              | 254 | 149 | 0.995    | 0.815  | 0.18   | 0.18  | 0              | 0        |
| SE   | chr11 | Acsf2         | + | 94569941-94570032:94570303-94570460:94570614-94570709              | 298 | 149 | 0.985    | 0.8047 | 0.181  | 0.181 | 6.9591E-05     | 0.001222 |
| SE   | chr14 | Mycbp2        | + | 103262702-103262821:103275789-103275890:103276373-103276518        | 250 | 149 | 0.984    | 0.804  | 0.181  | 0.181 | 4.97047E-13    | 5.37E-11 |
| SE   | chr1  | Syt14         | + | 192933114-192933385:192940966-192941110:19298046-192980428         | 273 | 149 | 0.2613   | 0.4417 | -0.181 | 0.181 | 0.004879504    | 0.045231 |
| SE   | chr7  | Lsm14a        | + | 34344637-34345958:34347926-34347982:34351286-34351517              | 205 | 149 | 0.5017   | 0.3213 | 0.18   | 0.18  | 4.34592E-09    | 2.34E-07 |
| SE   | chr12 | Trim9         | + | 70252443-70252484:70255038-70255226:70267234-70267263              | 298 | 149 | 0.8917   | 0.712  | 0.18   | 0.18  | 2.75171E-05    | 0.000554 |
| SE   | chr11 | Fbf1          | + | 116164663-116165912:116167133-116167228:116167552-116168178        | 244 | 149 | 0.7057   | 0.886  | -0.181 | 0.181 | 4.2764E-05     | 0.000806 |
| A5SS | chr8  | Pnpla6        | + | 3537767-3537883:3537767-3538085:3541291-3541592                    | 298 | 149 | 0.9697   | 0.7903 | 0.179  | 0.179 | 2.50135E-07    | 1.23E-05 |
| A5SS | chr9  | Cep70         | + | 99277937-99278018:99277937-99278157:99281028-99281027              | 287 | 149 | 1        | 0.8213 | 0.179  | 0.179 | 7.14905E-07    | 2.99E-05 |
| RI   | chr18 | Poi1          | + | 70525344-70525528:70525344-70526721:70526557-70526712              | 259 | 149 | 0.3003   | 0.1213 | 0.179  | 0.179 | 0.000498294    | 0.003455 |
| RI   | chr18 | Slc35a4       | + | 36681528-36681765:36681528-36683862:36681874-36683862              | 256 | 149 | 0.5773   | 0.3987 | -0.179 | 0.179 | 0.008300014    | 0.005382 |
| SE   | chr7  | Z310010J17Rik | + | 90124836-90125032:90126928-90127044:90129872-90129936              | 265 | 149 | 0.0447   | 0.2327 | -0.179 | 0.179 | 9.96139E-05    | 0.001372 |
| SE   | chr3  | Ck2-scamp3    | + | 89168695-89168923:89169615-89169702:89170049-89170115              | 236 | 149 | 0.8133   | 0.634  | 0.179  | 0.179 | 0.000152167    | 0.002387 |
| SE   | chr6  | Ptcd3         | + | 71889894-71889866:71892469-71892519:71893382-71893526              | 199 | 149 | 0.9897   | 0.8103 | 0.179  | 0.179 | 5.55112E-16    | 9.03E-14 |
| SE   | chr17 | Slc25a27      | + | 43661614-43661698:43664074-43664265:43666900-43667015              | 198 | 149 | 0.9793   | 0.803  | 0.179  | 0.179 | 7.28306E-14    | 9.03E-12 |
| SE   | chr11 | Srcin1        | + | 97537044-97537239:97542534-97542557:97551677-97551978              | 172 | 149 | 0.4513   | 0.667  | -0.179 | 0.179 | 8.09536E-05    | 0.001393 |
| SE   | chr16 | Tic3          | + | 94403314-94403368:94412060-94412123:94415949-94416009              | 212 | 149 | 0.5917   | 0.7707 | -0.179 | 0.179 | 7.54952E-15    | 1.1E-12  |
| SE   | chr10 | Mical1        | + | 41479326-41479499:41479619-41479774:41480285-41480385              | 298 | 149 | 0.9903   | 0.8113 | -0.179 | 0.179 | 1.8381E-11     | 2.5E-09  |
| SE   | chr11 | Socs7         | + | 97376437-97376541:97376997-97377098:97377936-97378066              | 298 | 149 | 0.9757   | 0.7963 | 0.179  | 0.179 | 1.74749E-13    | 2.05E-11 |
| SE   | chr7  | Shank2        | + | 144405330-144405460:144407121-144407205:144408056-144408076        | 233 | 149 | 0.9203   | 0.7467 | 0.179  | 0.179 | 3.2568E-05     | 0.000618 |
| SE   | chr2  | Vipa39        | + | 87253166-87253258:87254230-87254286:87256485-87256549              | 205 | 149 | 0.9977   | 0.819  | 0.179  | 0.179 | 0              | 0        |
| SE   | chrX  | Upf3b         | + | 3796858-37970718:3799066-37991014:3799507-3799689                  | 187 | 149 | 0.4033   | 0.224  | 0.179  | 0.179 | 9.72797E-06    | 0.000187 |
| SE   | chr2  | Edem2         | + | 155713338-155713479:155716010-155716221:155718264-155718389        | 298 | 149 | 0.9427   | 0.764  | 0.179  | 0.179 | 1.84286E-09    | 0        |
| SE   | chr17 | Ptprs         | + | 56427939-56428132:56428852-56429157:56434453-56434597              | 298 | 149 | 0.988    | 0.809  | 0.179  | 0.179 | 0              | 0        |
| SE   | chr7  | Lymr1         | + | 119896137-119896252:119909671-119909962:119914173-119914265        | 298 | 149 | 0.8073   | 0.9887 | -0.178 | 0.178 | 6.66154E-07    | 2.14E-05 |
| A3SS | chr15 | Hdac10        | + | 89124532-89124598:89124175-89124428:89124175-89124256              | 298 | 149 | 0.8973   | 0.7197 | -0.178 | 0.178 | 0.00157169     | 0.015926 |
| A3SS | chr9  | Elm1d1        | + | 5394915-53949649:53953730-53953570:5395                            |     |     |          |        |        |       |                |          |

|      |       |          |   |                                                                    |     |     |        |        |        |       |             |          |
|------|-------|----------|---|--------------------------------------------------------------------|-----|-----|--------|--------|--------|-------|-------------|----------|
| A3SS | chr1  | Edem3    | + | 151811519-151811704:151812754-151812768:151812757-151812768        | 151 | 149 | 0.8437 | 0.6687 | 0.175  | 0.175 | 0.004231363 | 0.044705 |
| MXE  | chr1  | Odkh     | - | 6313788-6313979:6316765-6316855:6316978-6317080:6324878-6324922    | 239 | 251 | 0.6627 | 0.838  | -0.175 | 0.175 | 6.90148E-07 | 3.31E-05 |
| MXE  | chr1  | Qcgh     | - | 86791995-8679211:8679381-8679391:8679911-8679908:86799461-867      | 226 | 245 | 0.9133 | 0.738  | 0.175  | 0.175 | 2.22045E-16 | 7.87E-14 |
| MXE  | chr15 | Cacn3b   | + | 9864039-9864045:9864068-9864070:9864095-9864098:9864117-986        | 120 | 168 | 0.1723 | 0.3473 | -0.175 | 0.175 | 0.000331533 | 0.006202 |
| MXE  | chr1  | Hjupr    | + | 88269321-8826941:8827020-8827029:8827279-8827285:88275042-882      | 185 | 246 | 0.096  | 0.271  | -0.175 | 0.175 | 0.001287391 | 0.018326 |
| RI   | chr6  | Luc72    | + | 38557852-38558075:38557852-38559304:38559204-38559304              | 298 | 149 | 0.521  | 0.3463 | 0.175  | 0.175 | 4.83969E-06 | 6.21E-05 |
| SE   | chrX  | Nlgn3    | + | 101301785-101302431:101307075-101307134:101308757-101308906        | 298 | 149 | 0.623  | 0.448  | 0.175  | 0.175 | 0.001888513 | 0.020145 |
| SE   | chr12 | Nrcam    | + | 44576604-44576780:44584835-44584987:44590108-44590239              | 298 | 149 | 0.295  | 0.12   | 0.175  | 0.175 | 0.000120049 | 0.001946 |
| SE   | chr8  | Sup2     | + | 70260469-70260589:702611231-70261137:70262871-70263105             | 235 | 149 | 0.242  | 0.417  | -0.175 | 0.175 | 8.37066E-06 | 0.000196 |
| SE   | chrX  | Rppr     | + | 10158216-10158880:10162602-10162690:10164722-10164779              | 237 | 149 | 0.893  | 0.704  | 0.175  | 0.175 | 9.12404E-05 | 0.001544 |
| SE   | chr11 | Unk      | - | 116056191-116056379:116058327-116058424:116058989-116059244        | 246 | 149 | 0.92   | 0.747  | 0.175  | 0.175 | 0.000105347 | 0.001745 |
| SE   | chr16 | Dzip3    | - | 48943457-48943552:48944763-48944928:48945598-48945623              | 298 | 149 | 0.9603 | 0.7865 | 0.175  | 0.175 | 2.07112E-12 | 2.03E-10 |
| SE   | chr10 | Tab2     | - | 7924685-7924872:7933068-7933068:7958001-7958665                    | 298 | 149 | 0.0613 | 0.2067 | -0.175 | 0.175 | 9.21485E-15 | 1.31E-12 |
| SE   | chr15 | Azin1    | - | 38501404-38501600:38507187-38507346:38514473-38514609              | 298 | 149 | 0.1563 | 0.331  | -0.175 | 0.175 | 0           | 0        |
| SE   | chr6  | lpr1     | + | 108363610-108363705:108365299-108365343:108369011-108369165        | 193 | 149 | 0.9447 | 0.777  | 0.175  | 0.175 | 2.73523E-05 | 0.000551 |
| SE   | chr4  | Cttnal1  | - | 56817247-56817297:56822518-56822555:56826274-56826424              | 186 | 149 | 1      | 0.8247 | 0.175  | 0.175 | 2.22545E-06 | 6.13E-05 |
| SE   | chr13 | Mtr      | - | 12190204-12190404:12193614-12193810:12195238-12195393              | 298 | 149 | 0.9857 | 0.811  | 0.175  | 0.175 | 3.27272E-05 | 0.000642 |
| SE   | chrX  | Las1     | - | 95946867-95947073:95947398-95947448:95947770-95947855              | 199 | 149 | 0.4477 | 0.2727 | 0.175  | 0.175 | 5.83713E-05 | 0.001056 |
| SE   | chr5  | Add1     | + | 34628415-34628513:34629136-34629172:34630470-34631805              | 185 | 149 | 0.8767 | 0.7017 | 0.175  | 0.175 | 0           | 0        |
| SE   | chr8  | Vsp9d1   | - | 123245114-123245210:123245507-123245712:123245484-123246089        | 298 | 149 | 0.976  | 0.801  | 0.175  | 0.175 | 1.09912E-14 | 1.55E-12 |
| SE   | chr17 | Srf      | - | 46549436-46549512:46549845-46550036:46550901-46551020              | 298 | 149 | 0.7227 | 0.5477 | 0.175  | 0.175 | 0.000725212 | 0.009118 |
| A3SS | chr19 | Nhr2     | + | 56591576-56591807:56592393-56592515:56592427-56592515              | 182 | 149 | 0.8567 | 0.6823 | 0.174  | 0.174 | 0.001168302 | 0.017106 |
| A3SS | chr10 | Knc2     | + | 112458490-112458654:112463117-112466304:112466304-112466304        | 298 | 149 | 1      | 0.826  | 0.174  | 0.174 | 1.24121E-06 | 5.56E-05 |
| A3SS | chr9  | Tmem205  | - | 21927292-21927535:21927287-21927535:21926249-21926357              | 153 | 149 | 0.1073 | 0.281  | -0.174 | 0.174 | 1.43674E-06 | 5.28E-05 |
| A3SS | chr11 | Ghdc     | - | 100789398-100789529:100789028-100789529:100789385-100789577        | 298 | 149 | 0.9443 | 0.777  | 0.174  | 0.174 | 0.001135929 | 0.010987 |
| MXE  | chr15 | Kctd17   | + | 7843585-78435710:78436901-78437094:78437158-78437671:784338487-784 | 298 | 298 | 0.496  | 0.3223 | 0.174  | 0.174 | 2.7557E-07  | 1.52E-05 |
| MXE  | chr4  | Ube2f2   | + | 15595234-15595336:15595422-15595560:15595368-15595448:15595        | 287 | 229 | 0.5807 | 0.4067 | 0.174  | 0.174 | 8.22846E-07 | 3.75E-05 |
| MXE  | chr5  | Ccdc92   | - | 124834432-124838291:124838943-124839884:124838661-124839807:124886 | 295 | 190 | 0.8503 | 0.6763 | 0.174  | 0.174 | 0.003631948 | 0.041047 |
| MXE  | chr9  | Map4     | + | 109978850-109979091:109997772-109998840:110026101-110026223:110027 | 217 | 271 | 0.624  | 0.798  | -0.174 | 0.174 | 1.8551E-13  | 4.45E-11 |
| RI   | chr8  | Sup2     | + | 70260469-70260589:70260469-70261317:70261317-70261317              | 298 | 149 | 0.8087 | 0.6347 | 0.174  | 0.174 | 0.000144975 | 0.001178 |
| RI   | chr11 | Tbrd4    | + | 8615598-8615766:8615598-8616714:8616558-8616714                    | 298 | 149 | 0.8447 | 0.6707 | 0.174  | 0.174 | 4.94847E-06 | 6.32E-05 |
| SE   | chr3  | Rmad1    | - | 87927055-87927117:87927563-87927755:87927924-87928048              | 298 | 149 | 0.984  | 0.7903 | -0.174 | 0.174 | 6.08086E-08 | 2.47E-06 |
| SE   | chr4  | Ptprr    | - | 76050327-76050439:76054589-76054600:76059689-76059826              | 160 | 149 | 0.4417 | 0.268  | 0.174  | 0.174 | 3.88127E-05 | 0.00074  |
| SE   | chr11 | Zfp672   | - | 58319324-58319590:58322600-58322729:58323120-58323365              | 278 | 149 | 0.82   | 0.6463 | 0.174  | 0.174 | 0.00465564  | 0.034525 |
| SE   | chr7  | Peg3     | - | 6712673-6712775:6712850-6713012:6716054-6716157                    | 211 | 149 | 0.2817 | 0.1073 | 0.174  | 0.174 | 2.46315E-06 | 6.71E-05 |
| SE   | chr9  | Tcf12    | - | 72000416-72000518:72006701-72006762:72015638-72015711              | 210 | 149 | 0.1963 | 0.3707 | -0.174 | 0.174 | 4.3466E-08  | 1.83E-06 |
| SE   | chr16 | Mina     | + | 59487428-59487599:59489345-59489433:59491205-59491294              | 237 | 149 | 0.898  | 0.7237 | -0.174 | 0.174 | 0.002658415 | 0.027243 |
| SE   | chr9  | Map4     | + | 110068693-110068985:110071026-110071139:110072613-110072705        | 262 | 149 | 0.179  | 0.3527 | -0.174 | 0.174 | 1.69414E-08 | 7.77E-07 |
| SE   | chr4  | Fbxo44   | + | 148156146-148156281:148156395-148156490:148156609-148156706        | 244 | 149 | 0.225  | 0.3987 | -0.174 | 0.174 | 4.65639E-07 | 2.08E-05 |
| SE   | chr11 | Ctln1    | + | 45895060-45895129:45902211-45902285:45906181-45906467              | 223 | 149 | 0.9343 | 0.76   | 0.174  | 0.174 | 7.26333E-10 | 4.47E-08 |
| SE   | chr8  | Wdr17    | - | 54643114-54643225:54645338-54645358:54648220-54648359              | 169 | 149 | 0.2647 | 0.0903 | 0.174  | 0.174 | 2.43533E-06 | 6.63E-05 |
| SE   | chr7  | Lym1     | + | 119896138-119896252:119909804-119909962:119914173-119914265        | 298 | 149 | 0.127  | 0.987  | -0.174 | 0.174 | 9.20541E-07 | 2.84E-05 |
| A3SS | chr11 | Hdac5    | - | 102224734-102224955:102218416-102218953:102218416-102218487        | 298 | 149 | 0.1723 | 0.345  | -0.173 | 0.173 | 1.3158E-07  | 9.31E-06 |
| A3SS | chr8  | Atip13a1 | + | 69799321-69799478:69799762-69799937:69799937-69799937              | 218 | 149 | 0.6007 | 0.4273 | 0.173  | 0.173 | 1.7234E-06  | 7.87E-05 |
| A5SS | chr18 | Sltc12a2 | + | 57934951-57934998:57934951-57935491:57936308-57936430              | 298 | 149 | 0.2407 | 0.0673 | 0.173  | 0.173 | 7.73943E-09 | 5.39E-07 |
| A5SS | chr18 | Atrc     | - | 105929100-105929406:105929599-105929646:105999881-105999993        | 289 | 149 | 0.711  | 0.5383 | 0.173  | 0.173 | 0.000271059 | 0.004002 |
| MXE  | chr2  | Fbxw2    | + | 34808514-34808600:34812815-34813009:34825584-34822975:34825962-348 | 298 | 298 | 0.9357 | 0.7627 | 0.173  | 0.173 | 1.34102E-07 | 7.99E-06 |
| MXE  | chr7  | Fam168a  | + | 100812920-100813000:100824132-100824257:100831328-100831470:100834 | 274 | 291 | 0.2573 | 0.4033 | -0.173 | 0.173 | 2.6887E-08  | 1.66E-06 |
| MXE  | chr9  | Man2c1   | + | 57139246-57139401:57139611-57139705:57139870-57139964:57140382-571 | 246 | 243 | 0.896  | 0.723  | 0.173  | 0.173 | 3.96942E-05 | 0.001045 |
| RI   | chrX  | Gpm6b    | + | 166385391-166385481:166385391-166389033:16638952-166389033         | 298 | 149 | 0.864  | 0.6907 | 0.173  | 0.173 | 6.66134E-16 | 4.39E-14 |
| RI   | chr14 | Nds1     | - | 20725574-20725697:20725574-20727090:20726994-20727090              | 298 | 149 | 0.3403 | 0.1673 | 0.173  | 0.173 | 0.000214447 | 0.00169  |
| SE   | chr7  | Pot1b    | - | 55692722-55692877:55695027-55695317:55698457-55698587              | 298 | 149 | 0.9533 | 0.7803 | 0.173  | 0.173 | 0.000861022 | 0.010534 |
| SE   | chr12 | Ja2      | - | 112915471-112915517:112915605-112915718:112915880-112915993        | 262 | 149 | 0.8797 | 0.7026 | 0.173  | 0.173 | 5.10405E-05 | 0.000973 |
| SE   | chr8  | Adgr1    | + | 83928299-83928382:83928668-83928891:83929464-83930264              | 298 | 149 | 0.0997 | 0.277  | 0.173  | 0.173 | 6.40215E-08 | 2.58E-06 |
| SE   | chr7  | Zfand6   | - | 84632439-84634409:84652882-84653042:84679310-84679351              | 298 | 149 | 0.1683 | 0.3413 | -0.173 | 0.173 | 2.0228E-10  | 1.36E-08 |
| SE   | chr2  | Cacna1b  | - | 24678876-24679643:24682976-24683038:24685768-24685874              | 211 | 149 | 0.0637 | 0.2363 | -0.173 | 0.173 | 4.79489E-07 | 1.58E-05 |
| SE   | chr2  | Sh3glb2  | - | 30347081-30347104:30348555-30348617:30350288-30350380              | 210 | 149 | 0.752  | 0.925  | -0.173 | 0.173 | 4.72164E-10 | 3.01E-08 |
| SE   | chr6  | Tsen2    | - | 115547822-115548030:115549913-115549994:115553991-115554027        | 230 | 149 | 0.783  | 0.6097 | 0.173  | 0.173 | 5.51117E-05 | 0.001005 |
| SE   | chr11 | Ccdc157  | - | 4147700-4147777:4148439-4149084:4160159-4160293                    | 298 | 149 | 0.8273 | 1      | -0.173 | 0.173 | 0.000115487 | 0.013486 |
| SE   | chr2  | Odf2     | + | 29892186-29892276:29893038-29893154:29893444-29893512              | 265 | 149 | 0.5163 | 0.343  | 0.173  | 0.173 | 0.000117492 | 0.001909 |
| SE   | chr7  | Dlg2     | + | 92417224-92417323:92418088-92418133:92420632-92420673              | 294 | 149 | 0.4537 | 0.6267 | -0.173 | 0.173 | 0.000285931 | 0.004107 |
| SE   | chr18 | Ss18     | - | 14636496-14636618:14637392-14637484:14640257-14640361              | 191 | 149 | 0.347  | 0.174  | 0.173  | 0.173 | 0.001644357 | 0.018107 |
| SE   | chr8  | Copsr    | - | 13884788-13885201:13885666-13885881:13887760-13887826              | 298 | 149 | 0.9643 | 0.791  | 0.173  | 0.173 | 0           | 0        |
| A3SS | chr2  | Dph7     | + | 24963456-24963543:24965557-24965654:24965550-24965654              | 151 | 149 | 0.408  | 0.5803 | -0.173 | 0.173 | 0.004463211 | 0.046809 |
| A5SS | chr5  | Traf1d1  | - | 121373339-121373474:121373138-121373474:121372603-121372675        | 298 | 149 | 0.9223 | 0.7503 | 0.172  | 0.172 | 0           | 0        |
| A5SS | chr2  | Nrsn2    | - | 152374223-152374290:152374096-152374290:152368755-152369923        | 275 | 149 | 0.9087 | 0.7367 | 0.172  | 0.172 | 3.69116E-06 | 0.000115 |
| MXE  | chr15 | Kctd17   | + | 7843585-78435710:78436901-78436994:78437158-78437232:78437584-784  | 242 | 223 | 0.8287 | 0.6565 | 0.172  | 0.172 | 3.14435E-05 | 0.00086  |
| MXE  | chr13 | Fam169a  | + | 97091863-97091952:97094062-97094147:97097540-97097711:97106954-971 | 234 | 298 | 0.053  | 0.232  | -0.172 | 0.172 | 6.64402E-07 | 3.25E-05 |
| MXE  | chr16 | Dlg2     | + | 31842770-31842839:31846934-31846933:31847636-31847669:31853804-318 | 248 | 182 | 0.2913 | 0.1197 | -0.172 | 0.172 | 1.17332E-05 | 0.000511 |
| MXE  | chr19 | Nrxn1    | + | 6508778-65089449:6513716-65138055:65169233-65                      |     |     |        |        |        |       |             |          |

|      |       |              |   |                                                                    |     |     |        |        |        |       |              |          |
|------|-------|--------------|---|--------------------------------------------------------------------|-----|-----|--------|--------|--------|-------|--------------|----------|
| MXE  | chr9  | Tcf12        | - | 71922652-71922767-71943954-71944018-7200671-7200672-72015638-720   | 210 | 213 | 0.128  | 0.2967 | -0.169 | 0.169 | 0.000131257  | 0.002839 |
| RI   | chr9  | Daird3       | + | 108571782-108571864-108571782-108572297-108572187-108572297        | 298 | 149 | 0.988  | 0.819  | 0.169  | 0.169 | 0            | 0        |
| SE   | chr1  | Map4k4       | + | 40000531-40000749-40003763-40003987-40004087-40004913              | 298 | 149 | 0.8307 | 0.6613 | 0.169  | 0.169 | 1.47781E-11  | 1.23E-09 |
| SE   | chr4  | Srf10        | + | 135863040-135863202-135863526-135863576-135867126-1358689908       | 199 | 149 | 0.9923 | 0.823  | 0.169  | 0.169 | 0            | 0        |
| SE   | chr13 | Pfkfb        | + | 6588489-6596062-6597859-6598011-6598739-6598826                    | 298 | 149 | 0.775  | 0.9437 | -0.169 | 0.169 | 6.03994E-06  | 0.000148 |
| SE   | chr7  | Tgfb11       | + | 128248420-128248472-128248583-128248720-128248887-128248974        | 298 | 149 | 0.9383 | 0.7693 | 0.169  | 0.169 | 0.00193584   | 0.002941 |
| SE   | chr2  | Ppig         | + | 69723088-69723363-69731746-697331813-69732197-69732274             | 216 | 149 | 0.9637 | 0.7943 | 0.169  | 0.169 | 8.07667E-07  | 2.53E-05 |
| SE   | chr6  | Ldhb         | - | 142490249-142490604-142492943-142492616-142494100-142494177        | 272 | 149 | 0.9343 | 0.7653 | 0.169  | 0.169 | 0            | 0        |
| SE   | chr9  | Dnajc13      | - | 104237577-104237726-104238465-104238540-104246760-104246840        | 274 | 149 | 0.9697 | 0.801  | 0.169  | 0.169 | 1.99217E-07  | 7.2E-06  |
| SE   | chr4  | Rnf38        | + | 44152360-44152553-44158903-44159052-44167627-44167972              | 298 | 149 | 0.429  | 0.5977 | -0.169 | 0.169 | 1.41165E-05  | 0.00031  |
| SE   | chr9  | Snrk         | + | 122117266-122117407-122131893-122131942-122136906-122137601        | 198 | 149 | 0.6963 | 0.865  | -0.169 | 0.169 | 0.000931727  | 0.001258 |
| SE   | chr9  | Zfp810       | - | 22276737-22279280-22280453-22280565-22283168-22283260              | 255 | 149 | 0.928  | 0.729  | 0.169  | 0.169 | 0.06892E-07  | 7.44E-06 |
| SE   | chr5  | Zfp932       | + | 109996502-109996633-11000353-110003452-110006944-110007070         | 248 | 149 | 0.5543 | 0.759  | -0.169 | 0.169 | 0.002704153  | 0.02763  |
| SE   | chrX  | Atp11c       | + | 60223283-60225793-60229148-60229252-60236557-60236710              | 253 | 149 | 0.982  | 0.813  | 0.169  | 0.169 | 2.58524E-07  | 9.07E-06 |
| A5SS | chr16 | Kalm         | - | 34256191-34256360-34256152-34256360-34252225-34252399              | 187 | 149 | 0.729  | 0.5613 | 0.169  | 0.169 | 0.001068994  | 0.0123   |
| MXE  | chr18 | Fhod3        | + | 25001791-25002023-25028065-25028169-25056260-25056394-25060326-250 | 253 | 283 | 0.468  | 0.3    | 0.168  | 0.168 | 0.000526627  | 0.009089 |
| MXE  | chrX  | Pzd4         | + | 73796376-73796477-73796830-73796892-73798194-73798292-73798758-737 | 247 | 211 | 0.3287 | 0.497  | -0.168 | 0.168 | 6.69255E-07  | 3.25E-05 |
| MXE  | chr2  | Cacna1b      | + | 24622599-24622707-24631899-24632026-24635096-24635240-24637426-246 | 293 | 276 | 0.8577 | 0.709  | 0.168  | 0.168 | 1.00497E-06  | 4.44E-05 |
| MXE  | chr17 | Baq6         | + | 35148026-35146169-35146267-35146353-35146757-35146903-35147141-351 | 235 | 296 | 0.2527 | 0.421  | -0.168 | 0.168 | 1.49988E-09  | 1.4E-07  |
| MXE  | chr15 | Shank3       | + | 89543100-89543230-89543794-89543878-89547626-89549882-89557735-895 | 233 | 298 | 0.669  | 0.5013 | 0.168  | 0.168 | 0.00105734   | 0.002354 |
| MXE  | chr17 | Cacna1h      | + | 25384979-25385079-25385561-25385983-25386970-25387178-25387479-253 | 298 | 298 | 0.405  | 0.5733 | -0.168 | 0.168 | 0.000815158  | 0.012747 |
| MXE  | chr14 | Erc2         | + | 28302876-28303010-28317249-28317314-28383824-28384043-28475603-284 | 214 | 298 | 0.8403 | 0.6723 | 0.168  | 0.168 | 8.20014E-08  | 5.17E-06 |
| RI   | chr9  | Adams7       | + | 90192899-90193865-90192899-90194269-90194043-90194269              | 298 | 149 | 0.834  | 0.6663 | 0.168  | 0.168 | 0.00320285   | 0.017135 |
| SE   | chr5  | Km12c        | + | 23433129-23434783-23446526-23446598-23450152-23450336              | 221 | 149 | 0.1063 | 0.2747 | -0.168 | 0.168 | 3.5083E-14   | 4.54E-12 |
| SE   | chr11 | Uncl19       | + | 78347218-78347331-78347787-78347899-78348087-78349259              | 251 | 149 | 0.939  | 0.771  | -0.168 | 0.168 | 2.22054E-16  | 3.82E-14 |
| SE   | chr4  | Elavl2       | + | 91250786-91253570-91254141-91254179-91253992-91264145              | 287 | 149 | 0.991  | 0.823  | 0.168  | 0.168 | 5.7345E-08   | 2.28E-05 |
| SE   | chr11 | Sir          | + | 74912962-74913133-74919437-74919662-74925619-74925755              | 298 | 149 | 0.5577 | 0.3897 | 0.168  | 0.168 | 7.9733E-05   | 0.007189 |
| SE   | chr10 | Grip1        | + | 119818641-119819634-119897715-119897795-119929801-119930036        | 129 | 149 | 0.7917 | 0.96   | -0.168 | 0.168 | 8.29456E-06  | 0.001994 |
| SE   | chr14 | Rnf31        | + | 55601881-55601938-55602603-55602699-55603256-55603424              | 245 | 149 | 0.9527 | 0.785  | 0.168  | 0.168 | 1.20462E-06  | 6.08E-05 |
| SE   | chr5  | Cdc7         | + | 106975485-106975660-106979295-106979444-106982964-106984439        | 298 | 149 | 0.975  | 0.8067 | 0.168  | 0.168 | 1.5311E-05   | 0.000331 |
| A3SS | chr1  | Dixf         | + | 193114605-193114717-193113757-193114002-193113757-193113887        | 263 | 149 | 0.814  | 0.647  | 0.167  | 0.167 | 0.00210705   | 0.004382 |
| A3SS | chr12 | Acpi1        | + | 30905069-30905142-30904718-30904983-30904718-30908413              | 298 | 149 | 0.306  | 0.1387 | 0.167  | 0.167 | 1.93989E-12  | 4E-10    |
| A3SS | chr8  | Polb         | + | 22639934-22640004-22637068-22637154-22637068-22637099              | 203 | 149 | 0.795  | 0.6277 | 0.167  | 0.167 | 6.88647E-07  | 3.68E-05 |
| A5SS | chr13 | 4k3420G17Rik | + | 119473833-119473956-119473833-119474194-119474833-119474924        | 298 | 149 | 0.5517 | 0.7187 | -0.167 | 0.167 | 7.82543E-08  | 4.59E-06 |
| MXE  | chr2  | Dph7         | + | 24962172-24962810-24963023-24963156-24965560-24965654-24965602-249 | 282 | 243 | 0.2367 | 0.07   | 0.167  | 0.167 | 6.0658E-08   | 4.05E-06 |
| MXE  | chr5  | Tc28         | + | 110879784-110879888-110892832-110893110-110895022-11089169-111100  | 298 | 296 | 0.1793 | 0.3467 | -0.167 | 0.167 | 1.20244E-07  | 7.3E-06  |
| MXE  | chr2  | Pkp4         | + | 59347924-59348041-59350494-59350622-59352262-59352335-59354203-593 | 277 | 222 | 0.5943 | 0.427  | 0.167  | 0.167 | 1.21382E-05  | 0.000376 |
| RI   | chr1  | Ab12         | + | 156640996-156641229-156640996-156649568-156641542-156649568        | 298 | 149 | 0.9413 | 0.7473 | 0.167  | 0.167 | 9.20281E-05  | 0.000803 |
| SE   | chr2  | Dlgap4       | + | 156748023-156748102-156748332-156748420-156748944-156748956        | 237 | 149 | 0.4923 | 0.6597 | -0.167 | 0.167 | 2.3607E-05   | 0.000483 |
| SE   | chr1  | Poqk         | + | 166393610-166400165-166401866-166401964-166408399-166408532        | 247 | 149 | 0.8507 | 0.684  | 0.167  | 0.167 | 3.21424E-05  | 0.000633 |
| SE   | chr17 | Zfp494       | + | 22343640-22343693-22355081-22355134-22358823-22358915              | 202 | 149 | 0.1533 | 0.3203 | 0.167  | 0.167 | 0.003472136  | 0.03406  |
| SE   | chr7  | Cars         | + | 14359649-14359708-143561859-143561926-143562961-143563041          | 216 | 149 | 0.9443 | 0.7707 | -0.167 | 0.167 | 8.21618E-11  | 5.91E-09 |
| SE   | chr13 | Erb2b1p      | + | 103823314-103823406-103824720-103824926-103834968-103835028        | 298 | 149 | 0.7277 | 0.5603 | 0.167  | 0.167 | 0.001407726  | 0.015931 |
| SE   | chr19 | Vdir         | + | 27234790-27234912-27236240-27236262-27238053-27238424              | 271 | 149 | 0.683  | 0.8497 | -0.167 | 0.167 | 5.558E-05    | 0.001012 |
| SE   | chr9  | Usp3         | + | 66540062-66540175-66542513-66542613-66543946-66544028              | 249 | 149 | 0.9927 | 0.8253 | 0.167  | 0.167 | 3.16293E-11  | 2.48E-09 |
| SE   | chr17 | Ppard        | + | 28286261-28286467-28295341-28295495-28297086-28297224              | 298 | 149 | 0.9607 | 0.793  | 0.167  | 0.167 | 3.0975E-05   | 0.000613 |
| SE   | chr9  | Rnf111       | + | 70475776-70476668-70502940-70503002-70503459-70503548              | 211 | 149 | 0.433  | 0.5997 | -0.167 | 0.167 | 0.001269735  | 0.014638 |
| SE   | chr8  | Tfcd2        | + | 123400625-123400697-123401058-123401189-123403417-123403815        | 280 | 149 | 0.0187 | 0.186  | -0.167 | 0.167 | 0            | 0        |
| SE   | chr18 | Ythcd2       | + | 44847744-44847879-44850038-44850434-44850636-44850701              | 275 | 149 | 0.9487 | 0.782  | 0.167  | 0.167 | 0.000689549  | 0.008727 |
| SE   | chr11 | Trim41       | + | 48806403-48807846-48808125-48808252-48809050-48809280              | 276 | 149 | 0.9773 | 0.81   | 0.167  | 0.167 | 4.86731E-11  | 3.7E-09  |
| SE   | chr5  | Srp2c        | + | 23525496-23525745-23526790-23526815-23527924-23528062              | 174 | 149 | 0.9957 | 0.8287 | 0.167  | 0.167 | 4.55191E-15  | 6.77E-13 |
| SE   | chr16 | Mcm4         | + | 15634439-15634577-15635049-15635144-15635230-15635325              | 244 | 149 | 0.974  | 0.807  | 0.167  | 0.167 | 1.21896E-07  | 4.62E-06 |
| SE   | chr12 | Trim9        | + | 70255038-70255226-70267234-70267266-70268062-70268200              | 181 | 149 | 0.7983 | 0.6317 | 0.167  | 0.167 | 0.00278975   | 0.028343 |
| SE   | chr4  | Fgf13        | + | 59131840-59131950-59250799-59250966-59567140-59567348              | 298 | 149 | 0.6913 | 0.8583 | -0.167 | 0.167 | 2.9901E-11   | 2.36E-09 |
| SE   | chr5  | Mapre3       | + | 30862498-30862643-30863204-30863405-30864574-30864728              | 298 | 149 | 0.936  | 0.7693 | 0.167  | 0.167 | 9.85692E-07  | 3.01E-05 |
| SE   | chr2  | Scn2a1       | + | 65735609-65735890-65743065-65743118-65748294-65748431              | 202 | 149 | 0.9983 | 0.8317 | 0.167  | 0.167 | 0            | 0        |
| A3SS | chr10 | Lzumo4       | + | 80704180-80704194-80704290-80704435-80704418-80704435              | 276 | 149 | 0.3987 | 0.2327 | -0.166 | 0.166 | 0.00012547   | 0.002893 |
| A3SS | chr1  | Rnpep        | + | 135267170-135267282-135267129-135267282-135266870-135266978        | 189 | 149 | 0.2143 | 0.38   | -0.166 | 0.166 | 0.000188202  | 0.002936 |
| A5SS | chr4  | Rims3        | + | 120854779-120854933-120854779-120855122-120827477-120872650        | 298 | 149 | 0.9167 | 0.7503 | 0.166  | 0.166 | 8.52767E-08  | 4.87E-06 |
| MXE  | chr12 | Nrcam        | + | 44576604-44576789-44578145-44578180-44584835-44584987-44590108-445 | 184 | 298 | 0.8997 | 0.7307 | 0.166  | 0.166 | 6.83089E-05  | 0.001645 |
| MXE  | chr16 | Lrch3        | + | 32981828-32981904-32985976-32986027-32986739-32986888-32988431-329 | 210 | 298 | 0.5637 | 0.3973 | 0.166  | 0.166 | 0.0005204326 | 0.030866 |
| MXE  | chr11 | Spag9        | + | 94013623-94013743-94036600-94036670-94043572-94043666-94048408-946 | 209 | 243 | 0.4063 | 0.2600 | 0.166  | 0.166 | 0.003240724  | 0.037601 |
| MXE  | chr18 | Fam13b       | + | 34462961-34463009-34465186-34465220-34473550-34473685-34486979-344 | 284 | 213 | 0.5113 | 0.6777 | -0.166 | 0.166 | 4.77099E-06  | 0.000177 |
| SE   | chr13 | Pdlm7        | + | 55507864-55507880-55508208-55508326-55508780-55508810              | 267 | 149 | 0.8987 | 0.733  | 0.166  | 0.166 | 7.75982E-11  | 5.6E-09  |
| SE   | chr11 | Ogh          | + | 6316765-6316855-6324878-6324922-6334533-6334648                    | 193 | 149 | 0.5353 | 0.7013 | -0.166 | 0.166 | 0.000369263  | 0.000991 |
| SE   | chr3  | Gm3764       | + | 88227366-88227624-88228559-88228694-88229012-88229365              | 284 | 149 | 0.4943 | 0.328  | 0.166  | 0.166 | 2.23763E-08  | 1E-06    |
| SE   | chr12 | Rock2        | + | 16928945-16929034-16934241-16934366-16940403-16940540              | 254 | 149 | 0.068  | 0.2337 | -0.166 | 0.166 | 2.00005E-06  | 5.61E-05 |
| SE   | chr14 | Pbrn1        | + | 31054158-31054255-31056236-31056280-31061469-31061745              | 193 | 149 | 0.5497 | 0.716  | -0.166 | 0.166 | 0.001623307  | 0.017902 |
| SE   | chr4  | Mlb2         | + | 15656785-15657959-15658984-15659043-15659123-15659215              | 298 | 149 | 0.2587 | 0.425  | -0.166 | 0.166 | 2.47182E-06  | 6.73E-05 |
| SE   | chr3  | Ccnr1        | + | 6591                                                               |     |     |        |        |        |       |              |          |

|      |       |               |   |                                                                     |     |     |        |        |        |       |             |           |
|------|-------|---------------|---|---------------------------------------------------------------------|-----|-----|--------|--------|--------|-------|-------------|-----------|
| SE   | chr5  | Fip11         | + | 74557040-74557149-74564519-74564626-74571099-74571192               | 256 | 149 | 0.6433 | 0.4797 | 0.164  | 0.164 | 5.34265E-05 | 0.000978  |
| SE   | chr11 | Thoc5         | + | 4910627-4910759-4911435-4911470-4912781-4912858                     | 184 | 149 | 0.4533 | 0.2897 | 0.164  | 0.164 | 4.97507E-05 | 0.00092   |
| SE   | chr12 | Zc3h14        | + | 98774245-98774319-98779108-98779267-98783352-98783702               | 298 | 149 | 0.3433 | 0.5073 | -0.164 | 0.164 | 0.000453276 | 0.0061    |
| SE   | chr15 | Pup1f16a      | + | 76693014-76693138-76693227-76693352-76693585-76693724               | 274 | 149 | 0.8857 | 0.7217 | 0.164  | 0.164 | 0.000216739 | 0.003233  |
| SE   | chr12 | Dsd4          | - | 31642764-31642886-31646621-31646738-31646876-31646887               | 266 | 149 | 0.9547 | 0.791  | 0.164  | 0.164 | 0.000733556 | 0.009209  |
| SE   | chr5  | Ep400         | - | 110739296-110739681-110740182-110740289-110741970-110742060         | 296 | 149 | 0.8787 | 0.7147 | 0.164  | 0.164 | 0.000272721 | 0.00394   |
| SE   | chr10 | Mdm1          | + | 118146595-118146971-118150789-118150956-118152002-118152096         | 298 | 149 | 1      | 0.8357 | 0.164  | 0.164 | 6.72307E-05 | 0.001185  |
| SE   | chr16 | Son           | + | 91671349-91671465-91674695-91674774-91675401-91675499               | 228 | 149 | 0.316  | 0.48   | -0.164 | 0.164 | 0.000258987 | 0.003771  |
| SE   | chr3  | Zc2h1ca       | + | 7526269-7526417-7528030-7528129-7530976-7530981                     | 248 | 149 | 1      | 0.836  | 0.164  | 0.164 | 3.9746E-14  | 5.1E-12   |
| SE   | chr1  | lpo9          | - | 135420292-135420353-135426924-135427041-135430268-135430441         | 266 | 149 | 0.1437 | 0.3077 | -0.164 | 0.164 | 4.63527E-10 | 2.96E-08  |
| SE   | chrX  | Gripap1       | + | 7792228-7792337-7794992-7795099-7799290-7799428                     | 256 | 149 | 0.5357 | 0.6993 | -0.164 | 0.164 | 7.79941E-06 | 0.000184  |
| SE   | chr10 | Pkl3b         | + | 8469277-84693006-8469555-84695713-84696949-84697066                 | 298 | 149 | 1      | 0.836  | 0.164  | 0.164 | 2.06786E-08 | 9.33E-07  |
| SE   | chr9  | Pom3          | + | 59675029-59675195-59675568-59675734-59678044-59678225               | 298 | 149 | 0.1257 | 0.2897 | -0.164 | 0.164 | 0           | 0         |
| SE   | chr3  | Hlf3          | + | 20092678-20092816-20098080-20098215-20105641-20105765               | 286 | 149 | 0.9573 | 0.793  | 0.164  | 0.164 | 0.00029829  | 0.004273  |
| SE   | chr11 | 4933427D14Rik | - | 72189548-72189758-72191278-72191344-72191419-72191634               | 214 | 149 | 0.2953 | 0.4593 | -0.164 | 0.164 | 0.001459034 | 0.016405  |
| SE   | chr14 | Rab2b         | - | 52286642-52286734-52286818-52286900-52275443-52275510               | 231 | 149 | 0.9873 | 0.8237 | 0.164  | 0.164 | 0           | 0         |
| A3SS | chr10 | Knc2          | + | 112458490-112458654-112461965-112466304-112466391-112466304         | 298 | 149 | 1      | 0.8367 | 0.163  | 0.163 | 1.17281E-06 | 5.72E-05  |
| A3SS | chr3  | Fbxw17        | + | 50419840-50419877-50419840-50420028-50423202-50423262               | 298 | 149 | 0.156  | 0.319  | -0.163 | 0.163 | 1.8874E-05  | 0.000446  |
| MXE  | chr3  | Rmad1         | - | 87927055-87927117-87927563-87927755-87927924-87928048-87930444-879  | 273 | 298 | 0.14   | 0.303  | -0.163 | 0.163 | 0.001311975 | 0.018572  |
| MXE  | chr1  | Nckap5        | - | 125981383-125981697-126014571-126014649-126023033-126023210-1260242 | 298 | 227 | 0.6967 | 0.534  | 0.163  | 0.163 | 0.002879005 | 0.034292  |
| MXE  | chr14 | Cnkm2g        | - | 20744604-20744648-20745792-20745860-20747819-20747851-20755659-207  | 181 | 217 | 0.886  | 0.723  | 0.163  | 0.163 | 1.09382E-09 | 1.07E-07  |
| RI   | chr1  | Ppox          | - | 171280140-171280255-171280140-171280522-171280388-171280522         | 298 | 149 | 0.6857 | 0.5223 | 0.163  | 0.163 | 0.000833516 | 0.005391  |
| RI   | chr13 | Prip4b        | + | 34901393-34904089-34901393-34906064-34905883-34906064               | 298 | 149 | 0.4973 | 0.3343 | 0.163  | 0.163 | 3.33672E-06 | 4.47E-05  |
| RI   | chr15 | Klf2c         | + | 76662595-76662672-76662595-76662696-76662833-76662896               | 298 | 149 | 0.7217 | 0.8847 | -0.163 | 0.163 | 1.53744E-07 | 2.87E-06  |
| SE   | chr16 | Hspabp1       | + | 35813918-35814054-35814330-35814408-35817152-35817323               | 228 | 149 | 0.036  | 0.199  | -0.163 | 0.163 | 3.69202E-05 | 0.000711  |
| SE   | chr3  | Ank2          | + | 127104761-127104862-127248134-127248232-127330132-127339192         | 247 | 149 | 0.5493 | 0.7127 | -0.163 | 0.163 | 0.000302524 | 0.004304  |
| SE   | chr10 | Ppap          | + | 60295646-60296002-60297540-60297545-60299089-60299223               | 154 | 149 | 0.475  | 0.3123 | 0.163  | 0.163 | 6.45426E-11 | 4.76E-09  |
| SE   | chr6  | Tmccl1        | + | 116042871-116043805-116133767-116134029-116138195-116138250         | 298 | 149 | 0.9537 | 0.7907 | 0.163  | 0.163 | 0.000470434 | 0.006287  |
| SE   | chr19 | 9930021J03Rik | - | 29786249-29786449-29791349-29791444-29805282-29808053               | 244 | 149 | 0.078  | 0.2407 | -0.163 | 0.163 | 0.00034821  | 0.004849  |
| SE   | chr15 | Smut1         | - | 103157617-103157918-103158157-103158227-103163272-103163437         | 219 | 149 | 0.5173 | 0.68   | 0.163  | 0.163 | 0.004507706 | 0.042333  |
| SE   | chr2  | Metap1d       | + | 7115637-71156800-71522533-71522630-71523802-71523849                | 246 | 149 | 0.971  | 0.8083 | 0.163  | 0.163 | 2.30383E-09 | 1.3E-07   |
| SE   | chr18 | Diaph1        | + | 37905004-37905159-37906388-37906414-37935202-37935423               | 175 | 149 | 0.9797 | 0.817  | 0.163  | 0.163 | 1.59504E-09 | 9.16E-08  |
| SE   | chr7  | Srnp70        | + | 45380717-45380818-45381825-45383184-45383804-45383885               | 298 | 149 | 0.3007 | 0.464  | -0.163 | 0.163 | 4.33975E-12 | 3.98E-10  |
| SE   | chr2  | Kyatl1        | + | 30194054-30194112-30197957-30198159-30205633-30205699               | 298 | 149 | 0.3613 | 0.1983 | 0.163  | 0.163 | 0.000991367 | 0.011846  |
| SE   | chr2  | Ankrd16       | + | 11784291-11784452-11785123-11785260-11786224-11786302               | 298 | 149 | 0.4583 | 0.295  | 0.163  | 0.163 | 0.001188664 | 0.013814  |
| SE   | chr6  | Amn1          | + | 149170833-149171050-149183394-149183538-149188606-149188712         | 286 | 149 | 0.7053 | 0.8683 | -0.163 | 0.163 | 5.98931E-07 | 1.93E-05  |
| SE   | chr8  | Pbx4          | + | 69866468-69866603-69870029-69870182-69870578-69870684               | 298 | 149 | 0.832  | 0.6693 | 0.163  | 0.163 | 0.000857276 | 0.010494  |
| A3SS | chr4  | Gfr4a         | + | 131040399-131040475-131039632-131040325-131039632-131040258         | 215 | 149 | 0.9493 | 0.787  | 0.162  | 0.162 | 1.14653E-12 | 1.18E-10  |
| A5SS | chr4  | Mib2          | + | 155661323-155661374-155661106-155661174-155660950-155661021         | 298 | 149 | 0.908  | 0.7457 | 0.162  | 0.162 | 3.28542E-09 | 2.71E-07  |
| A5SS | chr14 | Kat5b         | + | 21624833-21624888-21624833-21625761-21626781-21626840               | 298 | 149 | 0.2847 | 0.4467 | -0.162 | 0.162 | 0.002067811 | 0.020373  |
| MXE  | chr15 | Cacnb3        | + | 98632301-98632520-98634148-98634251-98634436-98635213-98639488-986  | 252 | 298 | 0.047  | 0.2487 | -0.162 | 0.162 | 9.9021E-06  | 0.000315  |
| MXE  | chr2  | Ubr1          | + | 120870989-120871045-12087124-12087322-120875366-120875499-120881    | 282 | 257 | 0.086  | 0.208  | -0.162 | 0.162 | 7.84864E-05 | 0.001838  |
| MXE  | chr2  | Cers6         | + | 69068629-69068757-69071332-69071438-69105003-69105159-69108442-691  | 255 | 298 | 0.97   | 0.808  | 0.162  | 0.162 | 1.37035E-09 | 1.31E-07  |
| MXE  | chr3  | Hif1          | + | 20092678-20092816-20099776-20099955-20105641-20105765-20106350-201  | 298 | 273 | 0      | 0.162  | -0.162 | 0.162 | 5.32725E-09 | 4.37E-07  |
| MXE  | chr12 | Papola        | + | 105809524-105809662-105812274-105812394-105813198-105813282-10581E  | 299 | 233 | 0.047  | 0.2087 | -0.162 | 0.162 | 4.26365E-09 | 3.59E-07  |
| RI   | chr7  | 2310022A10Rik | + | 27580337-27580691-27580337-27582099-2758151-27582099                | 298 | 149 | 0.5721 | 0.4103 | 0.162  | 0.162 | 0.000219492 | 0.001668  |
| SE   | chr7  | Shis7         | - | 4830759-4830908-4831673-4831723-4834230-4834363                     | 199 | 149 | 0.357  | 0.5193 | -0.162 | 0.162 | 6.24907E-05 | 0.001115  |
| SE   | chr16 | Fogn1         | - | 14311043-14311131-14313816-14314013-14317294-14317332               | 298 | 149 | 0.9643 | 0.802  | 0.162  | 0.162 | 1.14653E-12 | 1.18E-10  |
| SE   | chr11 | Taf15         | + | 83487223-83487413-83497262-83497296-83497894-83497926               | 183 | 149 | 0.938  | 0.7763 | 0.162  | 0.162 | 8.31924E-07 | 2.6E-05   |
| SE   | chr1  | Tram1         | + | 13579450-13579566-13579690-13579811-13581023-13581086               | 270 | 149 | 0.9513 | 0.789  | 0.162  | 0.162 | 1.28023E-10 | 8.96E-09  |
| SE   | chr8  | Adgr11        | + | 83923019-83923108-83928298-83928382-83929464-83930264               | 233 | 149 | 0.1447 | 0.3067 | -0.162 | 0.162 | 6.97754E-05 | 0.001225  |
| SE   | chr3  | Lrrcc1        | + | 14533788-14534022-14535999-14536204-14536474-14536539               | 298 | 149 | 0.911  | 0.748  | 0.162  | 0.162 | 0.000258553 | 0.003767  |
| SE   | chr5  | Rundc3b       | + | 8494784-8494905-8512621-85126240-8520859-8520116                    | 295 | 149 | 0.187  | 0.3487 | -0.162 | 0.162 | 3.75643E-08 | 1.6E-06   |
| SE   | chr12 | Bmsl1         | + | 55865951-55866077-55868162-55868405-55868497-55869736               | 298 | 149 | 0.9813 | 0.8197 | 0.162  | 0.162 | 3.23104E-11 | 2.53E-09  |
| SE   | chr12 | Map4k5        | + | 6981384-69818498-69818809-69818811-69822803-69822863                | 151 | 149 | 0.9093 | 0.744  | 0.162  | 0.162 | 3.09048E-05 | 0.000612  |
| SE   | chr15 | Zc3h3         | + | 75837467-75837663-75839256-75840594-75841850-75841936               | 298 | 149 | 0.9257 | 0.767  | 0.162  | 0.162 | 0.00461306  | 0.043182  |
| SE   | chr4  | Szrd1         | + | 141118527-141118781-141120324-141120373-141139692-141139796         | 198 | 149 | 0.605  | 0.443  | 0.162  | 0.162 | 0.000120617 | 0.001955  |
| SE   | chr3  | Ect2          | + | 27145956-27146045-27146837-27147017-27148993-27149072               | 298 | 149 | 0.9683 | 0.8067 | 0.162  | 0.162 | 1.05146E-05 | 0.00024   |
| SE   | chr2  | Dnajc5        | + | 181520485-181520697-181521235-181521287-181546371-181546488         | 201 | 149 | 0.086  | 0.2477 | -0.162 | 0.162 | 0           | 0         |
| SE   | chr3  | Phf11         | + | 103985753-103985909-103987427-103987561-103991038-103991211         | 283 | 149 | 0.9477 | 0.7857 | 0.162  | 0.162 | 0.000745091 | 0.009321  |
| SE   | chr6  | Aak1          | + | 86956259-86956572-86959032-86959274-86963996-86964225               | 298 | 149 | 0.7217 | 0.8833 | -0.162 | 0.162 | 0.000320988 | 0.004255  |
| SE   | chr3  | Adgr12        | + | 148826365-148826533-148827541-148827585-148828477-148828568         | 193 | 149 | 0.3423 | 0.1803 | -0.162 | 0.162 | 8.85883E-09 | 4.41E-07  |
| SE   | chr13 | Gfm2          | + | 197165011-97165197-97168266-97168342-97171486-97171624              | 225 | 149 | 0.9907 | 0.8229 | 0.162  | 0.162 | 7.52612E-07 | 2.38E-05  |
| SE   | chr7  | Zfp446        | + | 12978998-12979378-12979451-12979646-12979888-12979979               | 298 | 149 | 0.9853 | 0.8233 | 0.162  | 0.162 | 6.27254E-05 | 0.000541  |
| SE   | chr5  | Agap3         | + | 24496731-24496903-24498070-24498207-24499658-24499812               | 286 | 149 | 0.9287 | 0.7687 | 0.162  | 0.162 | 0.000145242 | 0.002296  |
| A3SS | chrX  | Fmr1          | + | 68710584-68710779-68711496-68712413-68712231-68712413               | 298 | 149 | 0.2533 | 0.092  | 0.161  | 0.161 | 4.57862E-07 | 2.64E-05  |
| A3SS | chr3  | 492438A13Rik  | + | 37022384-37022474-37026090-37026343-37026231-37026343               | 289 | 149 | 0.8987 | 0.738  | 0.161  | 0.161 | 5.19446E-06 | 0.0004273 |
| A3SS | chr9  | Nrk2b         | + | 31396323-31396497-31396794-31397137-31397036-31397137               | 298 | 149 | 0.373  | 0.212  | 0.161  | 0.161 | 0.000473461 | 0.004815  |
| A5SS | chr7  | Gm1901        | - | 62207633-62207740-62207322-62207440-62207640-62209803               | 189 | 149 | 0.4278 | 0.117  | 0.161  | 0.161 | 0.001212552 | 0.013474  |
| A5SS | chr6  | Cttnb2        | + | 18433983-18434546-18433820-18435446-18427438-18427642               | 298 | 149 |        |        |        |       |             |           |

|      |       |                |   |                                                                    |     |     |        |        |        |       |             |          |
|------|-------|----------------|---|--------------------------------------------------------------------|-----|-----|--------|--------|--------|-------|-------------|----------|
| RI   | chr4  | Dhrs3          | + | 144892917-144893375-144892917-144893709-144893565-144893709        | 298 | 149 | 0.9867 | 0.8273 | 0.159  | 0.159 | 2.58898E-05 | 0.000267 |
| RI   | chr11 | Srsf1          | + | 88049043-88049215-88049043-88053757-88049412-88053757              | 298 | 149 | 0.272  | 0.4307 | -0.159 | 0.159 | 1.12576E-10 | 3.81E-09 |
| SE   | chr15 | Skp2           | - | 9123870-9124004-9125060-9125203-9139432-9139703                    | 292 | 149 | 1      | 0.8407 | 0.159  | 0.159 | 0.00019619  | 0.002973 |
| SE   | chr5  | Slc25a40       | + | 8447298-8447407-8449613-8449694-8452746-8452826                    | 230 | 149 | 0.988  | 0.8277 | 0.159  | 0.159 | 4.73695E-05 | 0.001294 |
| SE   | chr6  | Tmcc1          | - | 116042871-116043805-116133767-116134453-116138195-116138250        | 290 | 149 | 0.9567 | 0.8287 | 0.159  | 0.159 | 0.000405969 | 0.00553  |
| SE   | chr12 | Sell1          | - | 91831569-91831674-91833205-91833222-91841638-91841854              | 166 | 149 | 0.967  | 0.808  | 0.159  | 0.159 | 4.47308E-05 | 0.000837 |
| SE   | chr4  | 1110037F02Rik  | + | 11534189-11534321-11539910-11540062-11540481-11540641              | 298 | 149 | 0.9447 | 0.7857 | 0.159  | 0.159 | 7.63782E-07 | 2.41E-05 |
| SE   | chr17 | Crim1          | + | 78237742-78237915-78302987-78303108-78313124-78313306              | 270 | 149 | 0.7737 | 0.933  | -0.159 | 0.159 | 0.001015276 | 0.012097 |
| SE   | chr2  | Cntr1          | + | 35113324-35113454-35116672-35116802-35118055-35118196              | 279 | 149 | 0.841  | 1      | -0.159 | 0.159 | 1.40615E-05 | 0.000309 |
| SE   | chr16 | Tm12a          | + | 18251549-18251660-18252126-18252248-18252402-18252477              | 271 | 149 | 0.9487 | 0.7893 | 0.159  | 0.159 | 6.09957E-13 | 6.51E-11 |
| SE   | chr3  | Zfp687         | - | 95010345-95012476-95013833-95013928-95015320-95015413              | 244 | 149 | 0.163  | 0.3223 | -0.159 | 0.159 | 0.00011231  | 0.001828 |
| SE   | chr1  | Mrip30         | + | 37890563-37890584-37892943-37893023-37893938-37894015              | 229 | 149 | 0.7903 | 0.6317 | 0.159  | 0.159 | 3.80695E-13 | 4.21E-11 |
| SE   | chr7  | Map6           | + | 99320499-99321285-99323692-99323999-99335986-99336052              | 298 | 149 | 0.8163 | 0.9753 | 0.159  | 0.159 | 0.000146818 | 0.002317 |
| SE   | chr11 | Fbxw11         | + | 32642003-32642935-32652748-32652904-32708188-32708250              | 298 | 149 | 0.2223 | 0.381  | -0.159 | 0.159 | 6.40979E-05 | 0.001138 |
| SE   | chr16 | Trap1          | - | 4056330-4056439-4060757-4060917-4062330-4062401                    | 298 | 149 | 0.984  | 0.825  | 0.159  | 0.159 | 4.66693E-12 | 4.24E-10 |
| SE   | chr7  | Shank2         | + | 144407121-144407232-144408056-144408076-144409462-144410968        | 169 | 149 | 0.9303 | 0.7717 | 0.159  | 0.159 | 0.000145069 | 0.002293 |
| SE   | chr1  | Sdccb8g        | + | 176824752-176824904-176826199-176826284-176828870-176828983        | 234 | 149 | 1      | 0.841  | 0.159  | 0.159 | 1.65821E-06 | 4.75E-05 |
| SE   | chr3  | Slc34a5        | + | 153973423-153973798-154046929-154047012-154171569-154171617        | 230 | 149 | 0.0563 | 0.2157 | -0.159 | 0.159 | 9.96674E-07 | 3.04E-05 |
| SE   | chr6  | Wbp1           | - | 83120185-83120287-83120773-83120873-83121203-83121461              | 252 | 149 | 0.8783 | 0.7197 | 0.159  | 0.159 | 1.09646E-09 | 6.51E-08 |
| SE   | chr9  | Apeh           | + | 108092981-108093074-108093622-108093748-108094227-108094359        | 275 | 149 | 0.913  | 0.7543 | 0.159  | 0.159 | 0.000173556 | 0.002677 |
| SE   | chr13 | E430024f08Rik  | + | 74449956-74450016-74450236-74450362-74462582-74462666              | 275 | 149 | 0.9047 | 0.746  | 0.159  | 0.159 | 0.000493654 | 0.006553 |
| SE   | chr15 | Cdh9           | + | 16728999-16729035-16777570-16777624-16778061-16778325              | 203 | 149 | 0      | 0.1587 | -0.159 | 0.159 | 1.18983E-10 | 8.39E-09 |
| SE   | chr14 | Dhdn1          | + | 45593171-45595664-45599102-45599185-45601565-45601756              | 232 | 149 | 0.1733 | 0.332  | -0.159 | 0.159 | 5.72916E-05 | 0.001039 |
| MXE  | chr12 | Slc8a3         | + | 81204892-81205016-81214066-81214168-81314260-81316104-81332641-813 | 298 | 252 | 0.2833 | 0.4417 | -0.158 | 0.158 | 0.004516616 | 0.048154 |
| MXE  | chr4  | Lrp8           | + | 107861133-107861357-107864009-107864077-107868978-107869150-107872 | 217 | 298 | 0.642  | 0.494  | -0.158 | 0.158 | 1.11821E-06 | 4.82E-05 |
| RI   | chr3  | Cnrl1          | + | 6594891-65948790-65948991-6595054-65950480-65950544                | 298 | 149 | 0.348  | 0.506  | -0.158 | 0.158 | 0.000253095 | 0.001885 |
| SE   | chr17 | Nlyra          | + | 48306650-48306796-48398982-48399065-48400438-48400580              | 232 | 149 | 0.8823 | 0.7243 | 0.158  | 0.158 | 8.17893E-05 | 0.001405 |
| SE   | chr2  | Dync12         | + | 71228600-71228690-71233649-71233708-71235915-71236303              | 298 | 149 | 0.9157 | 0.758  | 0.158  | 0.158 | 0           | 0        |
| SE   | chr2  | Rord1b         | + | 158058652-158058827-158070561-158070856-158074930-158077320        | 244 | 149 | 0.219  | 0.3773 | -0.158 | 0.158 | 0.00282715  | 0.028674 |
| SE   | chr10 | Tcf3           | - | 80410398-80410624-80412827-804130682-80413205-80413337             | 298 | 149 | 0.6907 | 0.8487 | -0.158 | 0.158 | 9.66898E-07 | 2.97E-05 |
| SE   | chr8  | Pkm1           | - | 83671299-83671441-83671717-83671793-83671907-83671969              | 225 | 149 | 0.9003 | 0.742  | 0.158  | 0.158 | 5.84095E-11 | 4.35E-09 |
| SE   | chr7  | Lrrc56         | + | 141207186-141207250-141207487-141207623-141207831-141207970        | 285 | 149 | 0.9247 | 0.7687 | 0.158  | 0.158 | 0.001800488 | 0.019522 |
| SE   | chr2  | D43004f1D05Rik | + | 104254956-104255570-104255968-104258508-104409929-104411771        | 298 | 149 | 0.4157 | 0.5737 | -0.158 | 0.158 | 0.001963633 | 0.02102  |
| SE   | chrX  | C230004f18Rik  | + | 61122012-61122159-61133366-61133503-61134721-61134796              | 286 | 149 | 0.9817 | 0.8237 | 0.158  | 0.158 | 1.26023E-05 | 0.00028  |
| SE   | chr11 | Bcas3          | + | 85801785-85801952-85814000-85814065-85825202-85826058              | 214 | 149 | 0.1757 | 0.334  | -0.158 | 0.158 | 0.000369004 | 0.005089 |
| SE   | chr14 | Erc2           | + | 28302876-28303010-28317249-28317314-28475603-28478537              | 214 | 149 | 0.517  | 0.6753 | -0.158 | 0.158 | 0.002080947 | 0.003797 |
| SE   | chr10 | Slc39a3        | + | 81033612-81033933-81034918-81035008-81037204-81037337              | 280 | 149 | 0.9303 | 0.7723 | 0.158  | 0.158 | 1.56707E-08 | 7.28E-07 |
| SE   | chr2  | Slc25a25       | + | 32420305-32420416-32420656-32420691-32421303-32421390              | 144 | 149 | 0.6673 | 0.5093 | 0.158  | 0.158 | 0.004700429 | 0.043863 |
| SE   | chr9  | Dzfp1          | + | 99639814-99639898-99641734-99641852-99642533-99642694              | 167 | 149 | 0.9813 | 0.823  | 0.158  | 0.158 | 1.27351E-05 | 0.000283 |
| A3SS | chr8  | Tcf25          | + | 123400625-123400697-123401058-123401118-123401076-123401189        | 266 | 149 | 0.286  | 0.1287 | 0.157  | 0.157 | 1.15634E-05 | 0.000419 |
| A5SS | chr14 | Kat5b          | + | 21624833-21624888-21624833-21625125-21626719-21626840              | 298 | 149 | 0.262  | 0.4187 | -0.157 | 0.157 | 0.002154572 | 0.021057 |
| MXE  | chr13 | Faf2           | + | 54641419-54641553-54645245-54645321-54648292-54648400-54649978-546 | 225 | 287 | 0.3903 | 0.5477 | -0.157 | 0.157 | 0.00241201  | 0.003134 |
| RI   | chr2  | Kcnj3          | + | 55446826-55446844-55446826-55447042-55446957-55447042              | 260 | 149 | 0.989  | 0.8323 | 0.157  | 0.157 | 7.15657E-07 | 1.19E-05 |
| RI   | chr13 | Srek1          | - | 103748759-103748854-103748759-103752702-10375294-103752702         | 298 | 149 | 0.3713 | 0.5283 | -0.157 | 0.157 | 6.87757E-06 | 8.52E-05 |
| RI   | chr8  | Slc10a7        | + | 78731609-78732149-78731609-78734005-78732487-78734005              | 298 | 149 | 0.9363 | 0.779  | 0.157  | 0.157 | 0.00438938  | 0.021791 |
| RI   | chr10 | Zfrz           | + | 81249165-81249260-81249165-81249796-81249685-81249796              | 298 | 149 | 0.233  | 0.0763 | 0.157  | 0.157 | 2.29851E-08 | 5E-07    |
| RI   | chr19 | Csf2ra         | + | 61225324-61225420-61225324-61225662-61225523-61225652              | 250 | 149 | 0.538  | 0.3813 | 0.157  | 0.157 | 3.79261E-06 | 5.02E-05 |
| RI   | chr13 | Bicd2          | + | 49383043-49383253-49383043-49387026-49384971-49387026              | 298 | 149 | 0.8683 | 0.7117 | 0.157  | 0.157 | 1.68391E-05 | 0.000184 |
| RI   | chr13 | Prip4b         | + | 34901393-34902131-34901393-34902675-34902630-34902675              | 298 | 149 | 0.6613 | 0.504  | 0.157  | 0.157 | 1.1438E-05  | 0.000131 |
| SE   | chr1  | Cep170         | + | 176758397-176758517-176761351-176761500-176769173-176769870        | 298 | 149 | 0.7977 | 0.641  | 0.157  | 0.157 | 1.36634E-06 | 4.01E-05 |
| SE   | chr9  | Azip2          | + | 118059057-118059175-118059620-118059666-118061714-118063580        | 195 | 149 | 0.572  | 0.2293 | -0.157 | 0.157 | 3.86583E-10 | 2.49E-08 |
| SE   | chr6  | Pip638         | + | 83954711-83954761-83957509-83957592-83958184-83958252              | 232 | 149 | 0.055  | 0.172  | 0.157  | 0.157 | 0.000156815 | 0.002449 |
| SE   | chr4  | Galt           | + | 41756513-41756561-41756682-41756811-41756939-41756995              | 278 | 149 | 0.6903 | 0.5333 | 0.157  | 0.157 | 0.002743507 | 0.02795  |
| SE   | chr4  | Mier1          | + | 103115560-103115660-103118239-103118315-103127273-103127297        | 225 | 149 | 0.7953 | 0.638  | 0.157  | 0.157 | 0.001794829 | 0.019497 |
| SE   | chr17 | Rhbd1l         | + | 25835999-25836193-25836399-25836572-25836988-25838367              | 298 | 149 | 0.3247 | 0.168  | 0.157  | 0.157 | 4.08513E-10 | 2.63E-08 |
| SE   | chr17 | Nhlh1          | + | 24633927-24634165-24634725-24634895-24635588-24635747              | 298 | 149 | 1      | 0.8427 | 0.157  | 0.157 | 2.75632E-05 | 0.000555 |
| SE   | chr2  | Miq2           | + | 180083345-180083460-180084064-180084312-180085380-180085902        | 298 | 149 | 0.9823 | 0.8257 | 0.157  | 0.157 | 1.29427E-06 | 3.83E-05 |
| SE   | chr2  | Dph7           | + | 24962174-24962625-24963023-24963156-24965557-24965654              | 282 | 149 | 0.7947 | 0.6373 | 0.157  | 0.157 | 0.001170922 | 0.013641 |
| SE   | chr11 | Lrrc75a        | + | 62604884-62606246-62609203-62609315-62620434-62620562              | 262 | 149 | 0.8987 | 0.742  | 0.157  | 0.157 | 0.000684562 | 0.008673 |
| SE   | chr16 | Pcdh17         | + | 84477515-84477687-84517945-84518028-84532875-84533796              | 231 | 149 | 0.2077 | 0.3643 | -0.157 | 0.157 | 0.000206635 | 0.000311 |
| SE   | chr5  | Ythcd1         | + | 86820066-86820175-86820633-86820686-86821252-86821346              | 202 | 149 | 0.6037 | 0.761  | -0.157 | 0.157 | 7.66007E-06 | 0.000182 |
| SE   | chr15 | Rfbfox2        | + | 77089607-77089615-77089862-77089893-77094451-77094490              | 180 | 149 | 0.2497 | 0.0923 | 0.157  | 0.157 | 0           | 0        |
| SE   | chr6  | C2cd5          | + | 143017883-143018073-143020324-143020374-143029160-143029246        | 199 | 149 | 0.207  | 0.364  | -0.157 | 0.157 | 0.000340763 | 0.004335 |
| SE   | chr12 | Map3k9         | + | 81725722-81725834-81727331-81727399-81729683-81729836              | 217 | 149 | 0.781  | 0.6243 | -0.157 | 0.157 | 0.004476657 | 0.042141 |
| A3SS | chr7  | Fgfr2          | + | 130167703-130167808-130162451-130164215-130164251-130164123        | 240 | 149 | 0.3977 | 0.2437 | 0.156  | 0.156 | 0.002022961 | 0.025882 |
| A3SS | chr1  | Mgal4a         | + | 37490260-37490393-37468537-37468583-37468537-37468579              | 152 | 149 | 0.768  | 0.9237 | 0.156  | 0.156 | 0.002988452 | 0.034782 |
| A5SS | chr3  | Dck2           | + | 86792069-86792111-86791995-86792111-86796151-867987412             | 122 | 149 | 0.9227 | 0.7687 | 0.156  | 0.156 | 2.59426E-12 | 4.07E-10 |
| A5SS | chr1  | Prr2c          | - | 162721445-162721539-162721430-162721539-162720081-162720606        | 163 | 149 | 0.7417 | 0.8977 | 0.156  | 0.156 | 3.39095E-05 | 0.000718 |
| MXE  | chr12 | Rlan           | + | 109627048-109627153-109640267-109640328-109642565-109642652-109642 | 210 | 236 | 0.0468 | 0.2023 | -0.156 | 0.156 | 1.24095E-10 | 1.53E-08 |
| MXE  | chr6  | Codc136        | + | 29415431-29415655-29417072-29417576-29417932-29418153-29419102     |     |     |        |        |        |       |             |          |

|      |       |               |   |                                                                      |     |     |        |        |        |       |             |          |
|------|-------|---------------|---|----------------------------------------------------------------------|-----|-----|--------|--------|--------|-------|-------------|----------|
| SE   | chr15 | Adcy6         | - | 98589978-98592232-98592312-98592475-98592673-98592797                | 298 | 149 | 0.9783 | 0.8243 | 0.154  | 0.154 | 6.44261E-07 | 2.08E-05 |
| SE   | chrX  | Hs6st1a       | - | 51386637-51390361-51428658-51428744-51679890-51680408                | 235 | 149 | 0.6703 | 0.8247 | -0.154 | 0.154 | 0.00042845  | 0.005944 |
| SE   | chr4  | Nol9          | + | 152045695-152045830-152045948-152046035-152046547-152046644          | 236 | 149 | 0.876  | 0.722  | 0.154  | 0.154 | 0.001921543 | 0.020629 |
| SE   | chr7  | Gltscr1       | - | 15987479-15989404-15993080-15993145-15996401-15996443                | 214 | 149 | 0.8893 | 0.735  | 0.154  | 0.154 | 0.002377013 | 0.024742 |
| SE   | chr16 | Itsn1         | + | 91854573-91854655-91858209-91858375-91863257-91863378                | 298 | 149 | 1      | 0.8463 | 0.154  | 0.154 | 9.88098E-15 | 1.4E-12  |
| SE   | chr3  | Adgr12        | - | 148815855-148817928-148818648-148818686-148821280-148821408          | 187 | 149 | 0.3083 | 0.154  | 0.154  | 0.154 | 7.50998E-07 | 2.38E-05 |
| SE   | chr11 | Sirt7         | - | 120618372-120619049-120619683-120619768-12062163-120620269           | 234 | 149 | 0.125  | 0.2793 | -0.154 | 0.154 | 7.08519E-08 | 2.83E-06 |
| SE   | chr18 | Mib1          | + | 10778149-10778300-10792895-10793027-10794478-10794564                | 281 | 149 | 0.9733 | 0.819  | 0.154  | 0.154 | 7.52192E-08 | 2.98E-06 |
| SE   | chr7  | Aamdcd        | - | 97565151-97565300-97569687-97569774-97579366-97579509                | 236 | 149 | 0.086  | 0.24   | -0.154 | 0.154 | 0.000923566 | 0.011169 |
| SE   | chr9  | Man2c1        | + | 57139246-57139401-57139598-57139708-57139870-57139964                | 259 | 149 | 1      | 0.8457 | 0.154  | 0.154 | 4.73123E-06 | 0.000118 |
| SE   | chr9  | Neo1          | - | 58880592-58880855-58884470-58884628-58888401-58888493                | 298 | 149 | 0.3897 | 0.2353 | 0.154  | 0.154 | 9.15218E-09 | 4.54E-07 |
| A5SS | chr5  | Wdfy3         | - | 101900059-101900249-101900014-101900249-101898427-101898561          | 193 | 149 | 0.52   | 0.367  | 0.153  | 0.153 | 0.003395643 | 0.029994 |
| A5SS | chr8  | Ssbp4         | - | 70598013-70598120-70597897-70598120-70597486-70597768                | 264 | 149 | 0.3277 | 0.165  | 0.153  | 0.153 | 5.56666E-12 | 7.74E-10 |
| MXE  | chr3  | Tars2         | - | 95746535-95746697-95747439-95747656-95748042-95748140-95750339-957   | 247 | 298 | 0.0887 | 0.2413 | -0.153 | 0.153 | 0.000194015 | 0.003944 |
| MXE  | chr14 | Ccser2        | - | 36874936-36879762-36888571-36888590-36890342-36890426-36896255-368   | 233 | 188 | 0.612  | 0.4593 | 0.153  | 0.153 | 0.00205905  | 0.0266   |
| MXE  | chr12 | Meg3          | + | 109544027-109544742-109546430-109546542-109549479-109549552-10954    | 261 | 222 | 0.4063 | 0.559  | -0.153 | 0.153 | 2.40719E-12 | 4.59E-10 |
| MXE  | chr1  | Lrrfp1        | + | 91107298-91107390-91108580-91108672-91110355-91110447-91112156-911   | 241 | 241 | 0.2967 | 0.1433 | 0.153  | 0.153 | 1.95289E-06 | 7.75E-05 |
| MXE  | chr15 | Ptk2          | + | 7334133-73343359-73365041-73365195-73391759-73391880-73394648-733    | 270 | 298 | 0.2573 | 0.1043 | 0.153  | 0.153 | 0.000646526 | 0.010587 |
| MXE  | chr19 | Nrxn2         | + | 6513716-6513805-6516923-6517248-6519249-6519327-6531268-6533217      | 298 | 227 | 0.638  | 0.791  | -0.153 | 0.153 | 1.33201E-09 | 1.28E-07 |
| SE   | chrX  | Ocr1          | + | 47948125-47948360-47956210-47956233-47960453-47960569                | 172 | 149 | 0.872  | 0.7187 | 0.153  | 0.153 | 0.000160968 | 0.002503 |
| SE   | chr3  | Ifi80         | - | 68916092-68916263-68917957-68918104-68918490-68918625                | 298 | 149 | 0.9753 | 0.8223 | 0.153  | 0.153 | 2.9644E-05  | 0.000592 |
| SE   | chr9  | Cyb561d2      | - | 107541003-107541040-107541497-107541650-107542035-107542188          | 298 | 149 | 0.951  | 0.7983 | 0.153  | 0.153 | 9.60189E-07 | 2.95E-05 |
| SE   | chr14 | Pbm1          | + | 31107094-31107310-31110415-31110679-31110713-31110783                | 298 | 149 | 0.2543 | 0.407  | -0.153 | 0.153 | 0.005385275 | 0.049163 |
| SE   | chr18 | Csrn1g3       | + | 53948048-53948154-53948645-53948688-53953245-53955578                | 172 | 149 | 0.8613 | 0.708  | 0.153  | 0.153 | 9.36181E-07 | 2.88E-05 |
| SE   | chr10 | Tcd3          | - | 80410398-80410624-80412834-80413062-80413205-80413337                | 298 | 149 | 0.6897 | 0.843  | -0.153 | 0.153 | 2.38074E-06 | 6.51E-05 |
| SE   | chr5  | Sird          | - | 112339877-112340123-112341036-112341136-112342875-112343040          | 189 | 149 | 0.9697 | 0.8163 | 0.153  | 0.153 | 6.13176E-13 | 6.53E-11 |
| SE   | chr10 | Crk2          | - | 49099463-49101272-49104979-49105065-49113370-49113620                | 235 | 149 | 0.077  | 0.2303 | -0.153 | 0.153 | 4.18554E-14 | 5.36E-12 |
| SE   | chr11 | Obr1          | - | 21989370-21989521-21989380-21989585-22001122-22001189                | 298 | 149 | 1      | 0.8467 | 0.153  | 0.153 | 6.96908E-07 | 2.22E-05 |
| SE   | chr1  | Tmem237       | - | 59117331-59117341-59117975-59118006-59119703-59119806                | 180 | 149 | 0.983  | 0.8297 | 0.153  | 0.153 | 5.3164E-11  | 4.2E-05  |
| SE   | chr2  | Cdc123        | - | 5803947-5803975-5804911-5805033-5807431-5807506                      | 271 | 149 | 0.9787 | 0.824  | 0.153  | 0.153 | 0           | 0        |
| SE   | chr14 | Fam160b2      | - | 70590129-70590231-70590340-70590444-70591575-70591747                | 253 | 149 | 0.9503 | 0.7977 | 0.153  | 0.153 | 0.000153447 | 0.002403 |
| A3SS | chr7  | Ntkk3         | - | 78191650-78192744-7819986-78199405-7819986-7819986-7819986           | 298 | 149 | 0.9117 | 0.8290 | 0.152  | 0.152 | 0.00011164  | 0.002659 |
| A3SS | chr5  | Sird          | - | 112339719-112339817-112339818-112339857-112339818-112339872          | 243 | 149 | 0.6127 | 0.4607 | -0.152 | 0.152 | 0.004193088 | 0.044562 |
| A3SS | chrX  | Cstf2         | + | 134072415-134072474-134073136-134073277-134084033-1340840523-1343841 | 226 | 149 | 0.7217 | 0.8737 | -0.152 | 0.152 | 0.00014393  | 0.0076   |
| A5SS | chr6  | Hnmpa2b1      | - | 51461983-51462055-51461920-51462055-51460930-51461433                | 211 | 149 | 0.8043 | 0.6523 | 0.152  | 0.152 | 1.80525E-09 | 1.6E-07  |
| A5SS | chr4  | Rnf38         | - | 44167627-44167972-44167466-44167972-44162360-44162563                | 298 | 149 | 0.15   | 0.307  | -0.152 | 0.152 | 2.54129E-06 | 8.4E-05  |
| MXE  | chr12 | Spta7         | + | 98631963-98632037-98633990-98634151-98634224-98634319-98637566-986   | 298 | 244 | 0.269  | 0.4207 | -0.152 | 0.152 | 0.002804363 | 0.033586 |
| MXE  | chr2  | Opr1          | + | 181715690-181715946-181716502-181716535-181717955-181718093-181711   | 182 | 287 | 0.3473 | 0.4997 | -0.152 | 0.152 | 0.001600276 | 0.021698 |
| MXE  | chr7  | Fam168a       | + | 100706640-100706893-100786804-100786891-100812920-100813000-100824   | 236 | 229 | 0.8077 | 0.656  | -0.152 | 0.152 | 1.62844E-07 | 9.54E-06 |
| MXE  | chr7  | Dhc7          | + | 143830139-143830265-143836638-143836727-143840433-143840523-143841   | 230 | 239 | 0.093  | 0.2447 | -0.152 | 0.152 | 4.68414E-06 | 0.000168 |
| MXE  | chr2  | H13           | + | 152895482-152895584-152700183-152700268-152703995-152704194-152704   | 234 | 298 | 0.635  | 0.7873 | -0.152 | 0.152 | 3.56037E-12 | 6.46E-10 |
| MXE  | chr4  | Rars2         | + | 34630473-34630570-34633658-34633713-34633727-34639321-34645697-346   | 204 | 225 | 0.307  | 0.1547 | 0.152  | 0.152 | 0.001830713 | 0.024103 |
| RI   | chr8  | Tsm161a       | + | 70180706-70180849-70180706-70181049-70180936-70181049                | 298 | 149 | 0.3803 | 0.2287 | 0.152  | 0.152 | 0.000502449 | 0.003474 |
| RI   | chr3  | Srsf11        | - | 158022841-158022950-158022841-158024231-158023243-158024231          | 234 | 149 | 0.4377 | 0.286  | 0.152  | 0.152 | 6.64127E-07 | 1.07E-05 |
| SE   | chr12 | Rhan          | + | 109640267-109640328-109643414-109643461-109645262-109645331          | 210 | 149 | 0.986  | 0.8337 | 0.152  | 0.152 | 1.21464E-10 | 8.55E-09 |
| SE   | chrX  | Arhgef9       | - | 95048930-95052154-95054229-95054290-95054943-95055011                | 196 | 149 | 0.39   | 0.2377 | 0.152  | 0.152 | 0.000493131 | 0.006549 |
| SE   | chr11 | Tada2a        | - | 84087414-84087457-84085563-84085771-84087111-84087182                | 298 | 149 | 0.9923 | 0.8403 | 0.152  | 0.152 | 1.58765E-08 | 7.36E-07 |
| SE   | chr3  | D930015E06Rik | - | 83906347-83906425-83909152-83903334-83910303-83910508                | 298 | 149 | 0.4357 | 0.8393 | 0.152  | 0.152 | 1.19757E-06 | 3.58E-05 |
| SE   | chr5  | Asphd2        | - | 112391158-112392255-112393460-112393581-112393785-112393999          | 272 | 149 | 0.6353 | 0.4837 | 0.152  | 0.152 | 0.001939254 | 0.020803 |
| SE   | chr11 | Dhx33         | - | 70992108-70992311-70993610-70993698-70993857-70994016                | 237 | 149 | 0.9887 | 0.8369 | 0.152  | 0.152 | 0.000109004 | 0.001797 |
| SE   | chr5  | Wbscr22       | - | 135053549-135053638-135053639-135053684-135056842-135056927          | 194 | 149 | 0.9883 | 0.8367 | 0.152  | 0.152 | 3.46455E-06 | 8.99E-05 |
| SE   | chr4  | Srsf4         | + | 131873612-131873870-131884276-131884482-131891022-131891349          | 298 | 149 | 0.1537 | 0.3056 | -0.152 | 0.152 | 7.8002E-07  | 2.4E-05  |
| SE   | chr4  | Ptpru         | - | 131793518-131793675-131794961-131794990-131797853-131797991          | 178 | 149 | 0.9183 | 0.7667 | 0.152  | 0.152 | 0.000108622 | 0.001792 |
| SE   | chr13 | Hmcs1         | + | 119690351-119690513-119694989-119695047-119699664-119700121          | 207 | 149 | 0.3617 | 0.5137 | -0.152 | 0.152 | 5.50662E-11 | 4.12E-09 |
| SE   | chr5  | Fbx5          | + | 43759743-43759825-43760707-43780655-43782817-43782942                | 297 | 149 | 0.9667 | 0.815  | 0.152  | 0.152 | 2.24265E-14 | 2.99E-12 |
| SE   | chr2  | Pknox         | - | 76643223-76643304-76647125-76647294-76647792-76647994                | 298 | 149 | 0.908  | 0.756  | 0.152  | 0.152 | 9.10383E-15 | 1.3E-12  |
| SE   | chr7  | Gdgd5         | + | 99387104-99387188-99405092-99405199-99410409-99410491                | 256 | 149 | 0.047  | 0.1993 | -0.152 | 0.152 | 1.44833E-08 | 6.81E-07 |
| SE   | chr16 | Hira          | + | 18894774-18894836-18895903-18896046-18896454-18896564                | 292 | 149 | 0.25   | 0.098  | 0.152  | 0.152 | 2.49257E-11 | 1.99E-09 |
| SE   | chr6  | Tia1          | + | 86419101-86420411-86423606-86423671-86424345-86424420                | 214 | 149 | 0.251  | 0.099  | 0.152  | 0.152 | 7.55618E-13 | 7.92E-11 |
| SE   | chr10 | Coq10a        | - | 128364405-128364506-128365023-128365215-128368007-128368153          | 298 | 149 | 0.9843 | 0.8323 | 0.152  | 0.152 | 3.91021E-13 | 4.31E-11 |
| SE   | chr2  | Chd6          | - | 160961863-160962014-160964758-160964794-160965169-160966740          | 185 | 149 | 0.073  | 0.225  | -0.152 | 0.152 | 1.63558E-06 | 4.7E-05  |
| SE   | chrX  | Araf          | + | 20858394-20858512-20858742-20858873-20859979-20860519                | 280 | 149 | 0.9863 | 0.8343 | 0.152  | 0.152 | 1.519E-06   | 4.41E-05 |
| SE   | chr1  | Ptprm         | - | 75260571-75260667-75262027-75262140-75262323-75262673                | 262 | 149 | 0.9733 | 0.821  | 0.152  | 0.152 | 6.53988E-12 | 5.81E-10 |
| SE   | chr14 | Dmtn          | - | 70617285-70617440-70617955-70618029-70618239-70618408                | 223 | 149 | 0.3877 | 0.5397 | -0.152 | 0.152 | 0.000587648 | 0.007626 |
| SE   | chr3  | Rap1gds1      | - | 138968868-138968996-138983722-138983868-139015646-139015671          | 295 | 149 | 0.432  | 0.5837 | -0.152 | 0.152 | 0.005302052 | 0.048497 |
| SE   | chr8  | Ap1g1         | + | 109829599-109829675-109830613-109830621-109832117-109832812          | 157 | 149 | 0.8557 | 0.7037 | 0.152  | 0.152 | 1.43708E-06 | 4.19E-05 |
| SE   | chr1  | Fastkd2       | + | 63735463-63735671-63735845-63739968-6373779-63737918                 | 272 | 149 | 1      | 0.848  | 0.152  | 0.152 | 0.000198159 | 0.002997 |
| A3SS | chr8  | Atp11a        | + | 12859314-12859479-12861640-12868728-12863759-12868728                | 298 | 149 | 0.9463 | 0.795  | 0.151  | 0.151 | 0.000286892 | 0.005687 |
| A3SS | chr19 | Rbm4b         | + | 4761977-4762647-4764350-4765940-4765263-4765940                      | 298 | 149 | 0.976  | 0.8247 | 0.151  | 0.151 | 1.01208E-06 | 5.11E-0  |
